# Supplementary material for: Manure application increased denitrifying gene abundance in a drip-irrigated cotton field
Source: PeerJ. 2019 Oct 23;7:e7894. doi: 10.7717/peerj.7894 (PMC6815196; doi:10.7717/peerj.7894)
Supplement: Supplemental Information 1 [file peerj-07-7894-s001.xlsx]

## Sheet: Table 2
Table 2 Soil (0-20 cm) properties of addition treatments in the drip-irrigated cotton field. U+M: 50% urea + 50% manure
Teatment	NO3-(mg kg-1)	Mean	SE	NH4+(mg kg-1)	Mean	SE	Total Ccontent (g kg-1)	Mean	SE	DOC(mg g-1)	Mean	SE	C:N	Mean	SE	Total N content (g kg-1)	Mean	SE
Control	28.254			14.438			9.10195			0.203			10.6538			0.854337
Control	15.44			13.883			7.80635			0.174			7.37112			1.05905
Control	14.278			13.969			7.09923			0.237			10.2129			0.69512
Control	24.031	20.5008	3.37774	13.93	14.055	0.128871	7.30634	7.82847	0.449691	0.207	0.20525	0.0128865	9.37761	9.40388	0.727424	0.779126	0.846907	0.0778308
Urea	30.041			14.616			7.46981			0.169			8.1176			0.9202
Urea	30.862			16.046			6.29429			0.16			7.96024			0.790716
Urea	34.798			27.326			7.57823			0.249			9.72878			0.77895
Urea	24.517	30.0545	2.11772	13.654	17.9105	3.17673	5.78165	6.781	0.442119	0.214	0.198	0.0207002	8.60221	8.60221	0.399598	1.52114	1.00275	0.175733
U+M	86.848			17.528			16.9224			0.298			12.6688			1.33575
U+M	96.697			14.668			12.0977			0.336			10.4366			1.15916
U+M	88.399			11.418			18.7939			0.391			13.1326			1.43108
U+M	206.636	119.645	29.0775	17.973	15.3968	1.51495	15.9603	15.9436	1.41049	0.461	0.3715	0.0354177	13.9867	12.5562	0.757409	1.1411	1.26677	0.0701957
M	103.385			24.659			15.9752			0.313			11.8959			1.34292
M	111.64			15.361			16.81			0.341			11.4229			1.47161
M	83.742			17.518			21.4649			0.39			14.3566			1.49512
M	113.328	103.024	6.78438	12.382	17.48	2.61437	22.1104	19.0901	1.57224	0.386	0.3575	0.0185315	17.1021	13.6944	1.30529	1.29285	1.40062	0.0490876

## Sheet: Table 3
Table 3 Richness and diversity of the microbial communityat as affected by addition treatments in a drip-irrigated cotton field used in this study.
treatment	Seq_num	Mean	SE	OTU_num	Mean	SE	Shannon	Mean	SE	ACE	Mean	SE	Chao1	Mean	SE	Coverage	Mean	SE	Simpson	Mean	SE
Control	25622			4259			7.21338			6365.48			6161.56			0.932441			0.002682
Control	28577			4554			6.92383			8324.61			6829.82			0.932008			0.008034
Control	27196	27131.7	853.641	4247	4353.33	100.393	6.79573	6.97764	0.123532	6313.93	7001.34	661.802	6069.24	6353.54	239.625	0.936572	0.933674	0.00145455	0.010417	0.00704433	0.00228708
Urea	28937			4528			7.08489			6737.25			6549.15			0.936379			0.004748
Urea	28741			4289			6.87098			7710.26			6334.89			0.937546			0.007436
Urea	28759	28812.3	62.5495	4368	4395	70.3017	6.88246	6.94611	0.0694703	6555.93	7001.15	358.399	6402.19	6428.74	63.2589	0.937724	0.937216	0.000421808	0.008338	0.00684067	0.00107825
M	26089			4099			7.17885			6112.69			5976.4			0.937177			0.002939
M	30718			4342			7.1565			6357.22			6232.34			0.944983			0.002779
M	22432	26413	2397.44	3775	4072	164.235	7.0489	7.12808	0.0401153	5848.09	6106	147.013	5707.72	5972.15	151.459	0.928183	0.936781	0.00485378	0.003507	0.003075	0.000220883
U+M	27849			4375			7.22909			6576.58			6467.68			0.93594			0.002495
U+M	31557			4537			7.12011			6763.64			6715.53			0.942168			0.003908
U+M	31810	30405.3	1280.25	3962	4291.33	171.179	6.98703	7.11208	0.0699921	5899.99	6413.4	262.326	5785.89	6323.03	277.94	0.950802	0.94297	0.00430899	0.002859	0.00308733	0.000423574

## Sheet: Table 4
Table 4 Relative abundances (%) of selected bacterial and archaeal taxa at the phylum level as affected by addition treatments.
phylum	Freq1（control）	Freq2(U+M)	pValue	qValue	Difference between means	95.0% lower CI	95.0% upper CI	A1(CK)	A2(CK)	A3(CK)	D1(U+M)	D2(U+M)	D3(U+M)
Actinobacteria	11.5594	9.3977	0.00298731	0.104556	2.16173	1.23113	3.09233	3071	3198	3128	2725	2825	3008
Euryarchaeota	0.772184	0.242471	0.0101406	0.177461	0.529713	0.287322	0.772104	195	227	207	97	74	46
candidate division WPS-2	0.0667173	0.00675966	0.0238429	0.278167	0.0599576	0.017311	0.102604	22	19	13	3	3	0
Thaumarchaeota	0.58199	0.30132	0.0246558	0.215738	0.28067	0.0728645	0.488476	151	154	168	111	95	65
Latescibacteria	0.117834	0.0406314	0.0275973	0.193181	0.0772026	0.0200112	0.134394	29	34	33	19	9	8
Planctomycetes	8.90304	10.3298	0.0294084	0.171549	-1.4268	-2.56746	-0.286146	2334	2557	2353	2708	3319	3419
Bacteroidetes	5.58091	11.3863	0.0324243	0.162121	-5.80539	-10.7274	-0.883352	1774	1627	1122	2622	3370	4474
Proteobacteria	32.5466	35.0689	0.131302	0.353506	-2.52223	-6.74688	1.70242	8216	9365	8921	9214	11563	11286
Armatimonadetes	0.616431	0.27037	0.0442375	0.172035	0.346061	0.0208274	0.671295	166	171	164	115	82	44
phylum	Freq1（control）	Freq2(M)	pValue	qValue	Difference between means	95.0% lower CI	95.0% upper CI	A1(CK)	A2(CK)	A3(CK)	C1(M)	C2(M)	C3(M)
Euryarchaeota	0.772184	0.242001	0.000720515	0.025218	0.530183	0.430538	0.629828	195	227	207	74	77	43
Ignavibacteriae	0.133896	0.246611	0.00221717	0.0388004	-0.112715	-0.157357	-0.0680727	37	42	30	59	77	59
Actinobacteria	11.5594	8.95654	0.00523015	0.0610184	2.60289	1.3755	3.83028	3071	3198	3128	2453	2824	1856
Thaumarchaeota	0.58199	0.24193	0.00651343	0.0569925	0.34006	0.180741	0.49938	151	154	168	75	47	64
Planctomycetes	8.90304	11.0762	0.013249	0.0927432	-2.17311	-3.41821	-0.928017	2334	2557	2353	3062	3329	2390
Armatimonadetes	0.616431	0.366478	0.0159956	0.0933075	0.249953	0.0963656	0.40354	166	171	164	117	100	73
Acidobacteria	11.5135	8.8192	0.0184757	0.0923783	2.69432	0.792932	4.59571	3220	3190	2940	2262	2543	2133
candidate division WPS-2	0.0667173	0.00680498	0.0235796	0.0916985	0.0599123	0.0174241	0.1024	22	19	13	3	0	2
Proteobacteria	32.5466	34.5958	0.23323	0.340127	-2.04912	-7.06433	2.96609	8216	9365	8921	8503	11309	7712
Latescibacteria	0.117834	0.0611376	0.0317522	0.111133	0.0566964	0.0114167	0.101976	29	34	33	17	24	9
phylum	Freq1（Urea）	Freq2(U+M)	pValue	qValue	Difference between means	95.0% lower CI	95.0% upper CI	B1（Urea）	B2（Urea）	B3（Urea）	D1(U+M)	D2(U+M)	D3(U+M)
Euryarchaeota	0.871125	0.242471	0.00185232	0.0648313	0.628655	0.390655	0.866654	253	219	281	97	74	46
candidate division WPS-2	0.0404745	0.00675966	0.00350531	0.0613429	0.0337148	0.0187863	0.0486433	14	10	11	3	3	0
Planctomycetes	8.27558	10.3298	0.00750741	0.0656898	-2.05427	-3.16605	-0.942479	2520	2272	2362	2708	3319	3419
Proteobacteria	32.2241	35.0689	0.219875	0.366458	-2.8448	-8.46823	2.77864	8505	10027	9316	9214	11563	11286
Armatimonadetes	0.673015	0.27037	0.0202293	0.141605	0.402645	0.103681	0.701609	235	164	183	115	82	44
phylum	Freq1(M)	Freq2（Urea）	pValue	qValue	Difference between means	95.0% lower CI	95.0% upper CI	C1 (M)	C2(M)	C3(M)	B1（Urea）	B2（Urea）	B3（Urea）
Planctomycetes	11.0762	8.27558	0.00351299	0.122955	2.80058	1.61266	3.98849	3062	3329	2390	2520	2272	2362
Euryarchaeota	0.242001	0.871125	0.00385321	0.0449541	-0.629125	-0.857408	-0.400841	74	77	43	253	219	281
Thaumarchaeota	0.24193	0.497279	0.0162129	0.141863	-0.255349	-0.432829	-0.07787	75	47	64	169	123	138
Ignavibacteriae	0.246611	0.138831	0.0203468	0.142428	0.107781	0.0318648	0.183696	59	77	59	39	30	51
Actinobacteria	8.95654	12.0747	0.0301654	0.175965	-3.11814	-5.66098	-0.575303	2453	2824	1856	3780	3078	3581
Armatimonadetes	0.366478	0.673015	0.0312785	0.156393	-0.306537	-0.562577	-0.0504962	117	100	73	235	164	183
candidate division WPS-1	0.783672	0.944048	0.0334235	0.146228	-0.160376	-0.298068	-0.0226843	186	243	190	271	261	284
Proteobacteria	34.5958	32.2241	0.306409	0.466275	2.37169	-3.34263	8.08601	8503	11309	7712	8505	10027	9316
Acidobacteria	8.8192	10.7339	0.0499656	0.194311	-1.91475	-3.829	-0.000495381	2262	2543	2133	3407	3009	2864

## Sheet: Figure 1 
Figure 1 Denitrifying enzyme activity (DEA) and nitrifying enzyme activity (NEA) as affected by addition treatments in the drip-irrigated cotton field.
Teatment	NEA(ug N-NO2-+NO3-g-1 h-1)	Mean	SE	DEA(ug N2O-N g-1 h-1)	Mean	SE
Control	0.3766			0.036372
Control	0.2579			0.0112752
Control	1.979			0.009651
Control	0.785	0.849625	0.393018	0.0104631	0.0169403	0.0064857
Urea	1.37137			0.008286
Urea	0.34411			0.0069588
Urea	0.27			0.0104778
Urea	3.5	1.37137	0.752736	0.0085742	0.0085742	0.000725504
U+M	6.492			0.604644
U+M	3.105			0.92514
U+M	0.48			0.480534
U+M	0.96	2.75925	1.36886	0.408258	0.604644	0.114269
M	2.429			0.400695
M	3.918			0.245652
M	1.5			0.555738
M	2.176	2.50575	0.509952	0.400695	0.400695	0.063296

## Sheet: Figure 2 and 4
	Drawing data of Figure 2 Principal Coordinates Analysis (PCoA) and Figure 4 Canonical correspondence analysis (CCA)
	weighted_unifrac_distance_matri
	treatment		A1	A2	A3	B1	B2	B3	C1	C2	C3	D1	D2	D3
	Control	A1	0	0.0801243	0.0893531	0.0691553	0.0874363	0.0833239	0.114324	0.126028	0.116939	0.095567	0.131637	0.182765
	Control	A2	0.0801243	0	0.0508737	0.0647537	0.0544716	0.0569144	0.121647	0.133392	0.121113	0.114127	0.12801	0.193288
	Control	A3	0.0893531	0.0508737	0	0.0680632	0.0674458	0.0609834	0.14035	0.151808	0.137199	0.133645	0.145926	0.21058
	Urea	B1	0.0691553	0.0647537	0.0680632	0	0.0822434	0.070641	0.12219	0.142654	0.118724	0.112661	0.14051	0.195802
	Urea	B2	0.0874363	0.0544716	0.0674458	0.0822434	0	0.0638618	0.123263	0.133173	0.125611	0.114335	0.119854	0.186398
	Urea	B3	0.0833239	0.0569144	0.0609834	0.070641	0.0638618	0	0.123917	0.134079	0.121276	0.117524	0.124134	0.192846
	M	C1	0.114324	0.121647	0.14035	0.12219	0.123263	0.123917	0	0.0743339	0.0648651	0.0670776	0.0848199	0.121614
	M	C2	0.126028	0.133392	0.151808	0.142654	0.133173	0.134079	0.0743339	0	0.0830079	0.0796353	0.0689197	0.109243
	M	C3	0.116939	0.121113	0.137199	0.118724	0.125611	0.121276	0.0648651	0.0830079	0	0.0735621	0.0967313	0.142184
	U+M	D1	0.095567	0.114127	0.133645	0.112661	0.114335	0.117524	0.0670776	0.0796353	0.0735621	0	0.0924008	0.132617
	U+M	D2	0.131637	0.12801	0.145926	0.14051	0.119854	0.124134	0.0848199	0.0689197	0.0967313	0.0924008	0	0.0997798
	U+M	D3	0.182765	0.193288	0.21058	0.195802	0.186398	0.192846	0.121614	0.109243	0.142184	0.132617	0.0997798	0
	Environmental fator
	treatment	Sample	pH	TON	TOC	C/N	NH4	NO3	DOC	CU	Fe
	Control	A1	8.07	0.85	9.1	10.65	14.44	28.25	0.2	17.6	23151
	Control	A2	7.85	0.7	7.1	10.21	13.97	14.28	0.24	15.42	24192.5
	Control	A3	8.11	0.78	7.31	9.38	13.93	24.03	0.21	16.67	24265.8
	Urea	B1	8.04	0.92	7.47	8.12	14.62	30.04	0.17	18.34	23553.8
	Urea	B2	8.11	0.79	6.29	7.96	16.05	30.86	0.16	16.59	24305.1
	Urea	B3	7.96	0.78	7.58	9.73	27.33	34.8	0.25	16.44	22974.7
	M	C1	7.91	1.47	16.81	11.42	15.36	111.64	0.34	17.37	23870.3
	M	C2	7.96	1.5	21.46	14.36	17.52	83.74	0.39	16.05	23801.1
	M	C3	7.91	1.29	22.11	17.1	12.38	113.33	0.39	15.99	23798.8
	U+M	D1	8.03	1.34	16.92	12.67	17.53	86.85	0.3	16.71	23478
	U+M	D2	8.02	1.16	12.1	10.44	14.67	96.7	0.34	17.06	23940.3
	U+M	D3	7.93	1.14	15.96	13.99	17.97	206.64	0.46	18.12	24410.7
OTU Table
Otu_num	abudance	length	A1(Control)	A2(Control)	A3(Control)	B1(Urea)	B2(Urea)	B3(Urea)	C1(M)	C2(M)	C3(M)	D1(U+M)	D2((U+M)	D3(U+M)	Total
Otu0	5387	381	665	1677	1972	1226	1680	1814	777	820	752	641	1208	775	14007
Otu1	1681	382	181	244	214	314	199	205	215	211	172	272	186	121	2534
Otu2	1265	379	481	1305	1313	903	1149	1232	539	595	495	438	821	510	9781
Otu3	1019	381	344	117	258	357	151	340	106	192	196	310	107	52	2530
Otu4	703	381	73	59	61	122	90	59	67	82	99	102	92	79	985
Otu5	606	380	240	630	643	368	565	651	243	250	279	184	477	234	4764
Otu6	532	380	165	633	676	318	509	543	251	234	205	258	370	185	4347
Otu7	474	381	85	40	109	139	125	80	61	39	64	71	104	48	965
Otu8	349	380	3	87	0	1	386	0	0	4	2	0	18	8	509
Otu9	331	377	0	0	0	1	0	0	7	11	0	23	56	345	443
Otu10	299	383	5	10	9	13	8	14	58	61	32	25	55	164	454
Otu11	294	379	58	93	93	42	88	108	35	48	37	49	67	23	741
Otu12	257	381	40	26	27	94	47	34	36	61	36	90	58	121	670
Otu13	254	381	45	47	34	62	57	50	40	57	47	46	38	37	560
Otu14	254	378	36	30	40	34	25	24	11	14	8	18	15	7	262
Otu15	247	381	124	212	290	284	197	243	167	160	125	188	140	112	2242
Otu16	247	381	135	241	222	276	247	307	213	233	164	240	263	199	2740
Otu17	237	379	51	63	57	51	59	46	36	20	16	32	28	19	478
Otu18	226	379	34	22	37	54	54	28	34	45	33	48	36	38	463
Otu19	222	378	8	1	0	3	2	1	36	224	83	42	18	7	425
Otu20	220	380	29	43	30	27	19	20	9	10	2	16	13	6	224
Otu21	216	379	83	42	52	67	38	41	50	67	67	71	48	14	640
Otu22	209	376	0	0	0	0	23	2	0	227	0	2	5	22	281
Otu23	208	379	27	23	7	10	26	9	42	151	61	90	184	259	889
Otu24	201	379	0	0	0	0	0	0	4	285	0	1	62	97	449
Otu25	193	382	27	26	1	17	9	22	30	35	12	26	57	34	296
Otu26	184	376	13	9	1	3	15	15	66	52	111	46	48	36	415
Otu27	183	379	11	17	14	4	18	17	80	196	54	61	135	336	943
Otu28	178	381	0	5	11	12	9	40	43	139	51	49	113	219	691
Otu29	178	380	60	87	88	95	60	45	16	22	6	28	23	8	538
Otu30	174	380	24	14	18	17	11	21	14	23	22	18	32	10	224
Otu31	173	380	114	135	94	163	129	182	230	238	220	177	195	194	2071
Otu32	165	376	47	100	44	100	117	118	176	109	201	145	165	127	1449
Otu33	163	379	66	52	63	65	53	50	41	37	25	49	27	31	559
Otu34	162	380	80	82	64	80	131	35	34	83	29	32	72	24	746
Otu35	248	380	231	274	188	300	270	245	180	203	106	241	172	50	2460
Otu36	155	382	107	192	134	216	164	173	52	45	42	72	143	47	1387
Otu37	154	376	15	7	13	11	24	12	9	9	2	268	24	1	395
Otu38	149	378	43	71	44	90	63	47	33	129	45	44	54	21	684
Otu39	147	376	2	4	0	0	4	0	51	106	28	35	102	153	485
Otu40	155	380	145	159	123	163	94	103	140	132	94	184	120	115	1572
Otu41	146	382	20	11	8	16	12	13	22	11	15	22	23	21	194
Otu42	146	381	41	25	29	38	38	26	21	15	24	29	21	5	312
Otu43	144	376	1	0	0	0	1	1	4	20	4	16	10	332	389
Otu44	137	376	0	20	0	0	3	0	4	67	0	1	50	142	287
Otu45	154	380	168	8	1	2	7	4	40	41	1	99	35	49	455
Otu46	126	378	28	27	31	26	53	36	72	55	63	42	17	23	473
Otu47	330	382	119	93	123	177	159	122	56	134	38	61	44	23	1149
Otu48	118	380	1	2	2	20	6	22	17	17	14	13	18	37	169
Otu49	164	379	1	8	0	0	13	1	53	141	65	56	126	220	684
Otu50	117	381	65	54	55	43	81	46	18	22	21	29	16	3	453
Otu51	115	385	0	0	1	0	0	0	0	67	0	0	47	118	233
Otu52	115	380	7	10	2	14	7	2	30	17	20	22	6	7	144
Otu53	113	380	144	62	52	30	29	20	33	55	36	70	31	39	601
Otu54	113	380	3	3	4	5	6	2	37	55	32	30	13	117	307
Otu55	111	380	6	20	24	22	15	45	7	19	30	11	9	7	215
Otu56	109	376	19	26	16	13	12	24	27	5	12	17	134	52	357
Otu57	102	381	23	43	38	66	43	24	126	203	162	109	190	243	1270
Otu58	351	381	168	225	258	153	234	198	212	148	158	234	143	79	2210
Otu59	101	378	46	58	62	60	50	72	50	51	59	50	46	34	638
Otu60	101	379	46	2	0	57	105	88	0	20	38	0	21	38	415
Otu61	101	380	10	6	3	5	14	13	104	118	93	76	103	107	652
Otu62	100	381	114	123	124	158	114	213	103	80	61	114	128	100	1432
Otu63	100	380	1	32	6	27	16	27	105	11	5	4	109	37	380
Otu64	100	379	20	18	31	22	17	16	19	16	5	15	16	4	199
Otu65	99	379	2	11	1	2	102	1	6	6	3	0	33	28	195
Otu66	98	381	13	19	5	8	12	25	63	50	51	67	41	145	499
Otu67	110	379	108	25	0	0	127	11	44	10	5	12	15	13	370
Otu68	97	383	38	68	29	54	65	33	123	37	25	77	109	73	731
Otu69	97	380	0	0	0	0	0	0	29	65	30	36	17	100	277
Otu70	164	378	22	21	45	33	24	26	16	15	9	27	24	9	271
Otu71	95	380	24	14	26	38	27	33	21	8	6	24	4	6	231
Otu72	93	381	8	4	12	14	7	10	34	29	28	18	26	12	202
Otu73	91	376	2	0	0	0	0	0	0	0	6	94	0	0	102
Otu74	110	381	109	81	50	81	76	78	98	91	105	118	102	62	1051
Otu75	90	379	56	25	47	46	39	24	51	67	64	57	47	48	571
Otu76	89	379	44	32	16	59	32	34	42	77	48	69	50	31	534
Otu77	191	384	71	90	106	115	91	80	68	53	34	69	66	51	894
Otu78	86	380	10	29	18	28	29	33	6	6	0	24	18	11	212
Otu79	86	379	23	36	35	23	17	58	24	23	35	32	16	13	335
Otu80	86	379	6	10	3	7	9	5	7	6	9	18	3	15	98
Otu81	85	380	9	33	17	25	69	16	66	90	43	81	22	30	501
Otu82	84	379	0	0	0	0	86	0	0	0	0	0	0	0	86
Otu83	104	378	26	31	13	1	28	1	34	122	48	37	114	151	606
Otu84	132	383	61	49	38	42	50	42	91	119	77	122	116	148	955
Otu85	89	383	89	87	86	96	59	45	16	13	13	41	40	15	600
Otu86	82	382	3	3	0	0	4	6	29	46	17	16	58	105	287
Otu87	82	378	128	7	14	5	9	42	45	1	1	9	10	8	279
Otu88	82	380	20	8	4	7	9	27	9	17	10	14	27	3	155
Otu89	81	380	2	2	1	0	0	0	20	35	28	12	21	82	203
Otu90	80	380	2	51	4	24	7	2	0	16	0	84	3	0	193
Otu91	79	380	7	4	7	1	4	6	36	38	24	25	43	112	307
Otu92	173	380	30	51	65	54	40	43	65	50	57	56	64	62	637
Otu93	165	380	34	5	2	3	6	3	52	57	17	25	118	83	405
Otu94	78	380	0	0	0	0	0	0	20	39	9	10	44	82	204
Otu95	78	380	46	60	55	60	30	43	70	62	36	71	68	84	685
Otu96	77	379	0	1	0	3	0	0	36	109	45	21	96	106	417
Otu97	82	382	161	178	158	146	163	58	201	77	187	100	184	100	1713
Otu98	76	380	16	6	21	18	92	48	22	26	20	16	50	5	340
Otu99	75	383	44	24	15	23	26	68	5	7	4	3	2	2	223
Otu100	112	379	0	12	4	1	16	0	67	57	11	7	86	112	373
Otu101	106	381	26	35	21	30	26	51	71	114	45	68	116	102	705
Otu102	91	380	74	117	116	95	107	98	92	80	86	117	92	74	1148
Otu103	73	378	43	53	47	50	65	100	11	25	17	41	60	15	527
Otu104	73	377	83	0	0	1	0	0	42	15	1	18	11	17	188
Otu105	72	380	48	16	26	15	30	15	17	12	10	15	5	5	214
Otu106	72	381	22	47	8	20	13	18	40	37	17	31	110	123	486
Otu107	70	379	23	28	37	44	43	33	12	7	9	17	27	13	293
Otu108	111	379	12	27	24	21	20	22	56	79	76	52	82	104	575
Otu109	70	379	0	1	0	0	0	3	6	70	11	7	21	66	185
Otu110	292	379	91	63	58	95	93	78	45	65	64	71	52	17	792
Otu111	82	379	10	14	14	25	28	12	51	68	86	64	43	28	443
Otu112	67	379	30	60	72	42	26	36	33	32	19	34	22	34	440
Otu113	136	376	1	0	0	1	0	1	16	71	32	25	38	79	264
Otu114	67	376	22	17	23	22	11	22	37	21	56	68	47	30	376
Otu115	67	381	0	1	1	2	0	0	16	41	1	16	6	72	156
Otu116	101	379	72	44	54	79	69	42	55	37	41	75	67	8	643
Otu117	66	380	1	5	6	2	10	8	29	81	30	24	45	92	333
Otu118	76	380	87	113	77	102	74	94	94	84	80	87	84	53	1029
Otu119	66	378	14	12	14	15	17	21	48	73	40	44	80	88	466
Otu120	65	379	74	83	80	79	84	55	19	29	18	38	60	17	636
Otu121	91	379	75	53	25	19	34	41	10	54	14	23	55	10	413
Otu122	64	381	27	42	38	34	24	26	3	5	9	14	5	4	231
Otu123	62	380	19	10	8	14	8	22	44	62	35	31	71	48	372
Otu124	62	379	58	35	23	43	48	31	32	98	52	49	40	10	519
Otu125	62	376	0	1	0	0	0	0	7	52	4	4	18	63	149
Otu126	61	380	81	56	37	57	42	70	66	57	31	41	16	22	576
Otu127	71	379	10	9	11	66	9	26	31	102	41	42	181	37	565
Otu128	77	381	33	8	17	36	53	34	69	62	67	67	71	78	595
Otu129	121	379	77	78	66	54	109	38	64	186	138	143	32	44	1029
Otu130	60	380	20	38	27	27	31	32	32	53	45	37	38	20	400
Otu131	60	382	0	0	0	0	0	0	13	4	13	3	0	62	95
Otu132	59	383	3	8	1	5	3	1	33	38	39	46	36	66	279
Otu133	58	380	75	74	63	112	104	37	23	29	17	47	23	8	612
Otu134	57	377	2	5	0	5	5	6	31	40	21	30	33	68	246
Otu135	57	383	49	34	26	62	37	59	6	7	10	13	9	9	321
Otu136	57	383	71	51	39	46	32	42	74	47	56	100	79	103	740
Otu137	56	379	13	8	1	13	12	4	5	3	6	4	61	7	137
Otu138	56	380	35	59	54	66	43	42	4	14	3	12	18	5	355
Otu139	55	378	10	9	7	23	6	5	3	3	3	4	4	5	82
Otu140	201	381	53	68	27	49	53	62	37	43	41	77	43	13	566
Otu141	55	380	15	19	14	35	18	26	58	55	54	52	42	35	423
Otu142	126	381	29	30	21	24	43	39	52	55	58	65	53	15	484
Otu143	54	383	4	1	4	5	11	13	33	87	28	24	82	87	379
Otu144	65	379	36	63	57	66	44	56	37	5	44	54	54	26	542
Otu145	69	381	35	40	41	52	29	83	50	39	45	57	86	32	589
Otu146	54	379	1	1	1	0	0	0	33	54	0	10	41	131	272
Otu147	52	382	17	23	12	14	17	15	17	41	17	18	43	42	276
Otu148	52	376	40	54	46	57	46	42	42	27	16	29	32	12	443
Otu149	52	380	0	0	0	0	0	0	3	4	7	1	71	10	96
Otu150	171	378	49	58	41	62	37	53	49	55	67	72	63	85	691
Otu151	51	378	1	1	1	4	2	5	7	36	8	11	17	51	144
Otu152	51	376	9	4	3	14	4	12	24	42	16	19	18	1	166
Otu153	51	381	35	56	50	32	40	31	35	44	27	52	24	11	437
Otu154	91	399	60	83	94	74	62	45	56	32	29	56	30	15	636
Otu155	67	381	43	36	78	71	55	84	48	30	18	34	16	3	516
Otu156	95	381	23	21	18	40	15	20	45	48	24	61	47	44	406
Otu157	49	380	12	1	0	0	0	1	0	6	0	0	49	52	121
Otu158	49	376	30	35	0	29	35	22	24	67	23	24	69	138	496
Otu159	49	379	24	10	5	6	17	17	6	50	1	4	25	55	220
Otu160	49	380	12	52	45	25	37	40	18	31	26	22	28	26	362
Otu161	49	380	0	0	0	0	0	0	11	6	2	46	1	52	118
Otu162	77	377	38	46	24	41	55	27	49	63	70	60	80	34	587
Otu163	49	378	0	0	0	0	0	0	0	0	0	0	0	86	86
Otu164	110	382	40	44	40	43	54	26	18	15	16	54	36	9	395
Otu165	48	378	1	3	1	0	1	0	12	25	13	2	21	50	129
Otu166	48	415	45	37	56	52	58	26	6	13	6	15	10	12	336
Otu167	66	381	4	3	4	7	2	1	15	31	69	24	30	53	243
Otu168	46	378	12	19	14	17	16	7	0	10	5	3	8	1	112
Otu169	59	378	59	56	48	67	48	32	21	9	14	32	18	12	416
Otu170	46	377	1	3	0	2	2	6	17	37	15	6	60	67	216
Otu171	46	381	0	0	0	0	0	0	19	9	18	0	0	0	46
Otu172	53	378	0	0	0	0	0	1	11	11	8	5	18	48	102
Otu173	45	379	41	9	9	7	6	6	8	10	16	61	10	22	205
Otu174	85	380	33	46	4	18	18	42	40	55	24	29	45	24	378
Otu175	45	382	53	36	40	13	13	13	45	35	3	12	11	16	290
Otu176	45	380	5	1	2	0	0	0	6	26	5	7	40	19	111
Otu177	44	378	0	0	0	1	0	0	0	0	46	0	0	0	47
Otu178	55	383	1	15	4	8	6	22	98	100	65	59	51	92	521
Otu179	44	379	0	0	0	1	1	0	1	4	1	0	20	66	94
Otu180	43	380	3	1	0	5	0	0	22	23	19	23	49	44	189
Otu181	49	380	12	13	13	9	10	14	45	43	51	41	8	5	264
Otu182	53	379	12	11	11	15	14	0	20	56	37	44	17	12	249
Otu183	51	381	8	29	22	10	101	55	15	46	9	4	15	48	362
Otu184	169	379	31	43	43	31	50	62	85	39	42	61	118	112	717
Otu185	94	376	21	16	4	14	15	11	55	42	64	47	12	10	311
Otu186	58	382	6	8	7	8	2	12	25	44	59	40	45	38	294
Otu187	42	378	3	15	18	21	12	4	0	3	0	0	5	0	81
Otu188	42	380	20	15	7	44	15	15	21	13	12	30	18	19	229
Otu189	51	376	58	9	3	10	6	47	31	6	2	9	5	5	191
Otu190	42	382	3	0	20	8	44	0	0	0	0	0	2	0	77
Otu191	42	379	25	24	7	6	46	6	1	0	1	0	1	2	119
Otu192	52	380	1	0	0	2	0	1	14	37	7	15	52	42	171
Otu193	42	383	0	5	2	0	3	1	27	21	16	15	26	44	160
Otu194	74	376	14	27	20	31	17	14	0	1	1	0	2	1	128
Otu195	75	381	42	29	73	2	36	97	4	0	0	1	1	42	327
Otu196	45	378	77	44	45	74	52	61	56	66	43	63	49	36	666
Otu197	40	378	0	0	0	1	0	0	15	26	8	12	27	58	147
Otu198	58	379	12	3	31	7	33	9	22	27	13	50	30	3	240
Otu199	126	380	43	37	50	45	34	40	43	28	25	49	27	30	451
Otu200	40	378	0	0	0	0	0	0	5	22	3	1	8	41	80
Otu201	39	380	11	14	0	3	25	15	0	21	2	11	20	40	162
Otu202	86	378	39	40	30	31	40	26	15	21	14	26	25	4	311
Otu203	39	381	48	58	67	60	19	75	54	60	32	39	79	29	620
Otu204	39	380	34	19	86	42	38	33	0	19	14	6	27	8	326
Otu205	39	382	11	20	11	22	11	12	14	18	11	10	1	12	153
Otu206	39	376	41	10	0	0	8	3	0	3	4	0	41	0	110
Otu207	75	381	42	74	37	34	63	25	4	23	1	16	20	8	347
Otu208	39	379	0	1	0	1	2	0	11	21	13	7	27	59	142
Otu209	39	378	1	39	0	0	17	0	6	6	12	0	37	18	136
Otu210	39	380	25	17	15	27	44	32	8	4	4	7	18	3	204
Otu211	38	378	11	0	1	10	0	12	21	16	37	10	40	116	274
Otu212	38	378	12	8	19	12	11	30	18	41	23	28	38	15	255
Otu213	105	379	0	2	1	0	3	1	105	32	40	66	13	59	322
Otu214	40	378	8	18	11	7	40	12	9	10	2	28	1	0	146
Otu215	38	379	25	15	19	32	12	19	17	27	13	29	28	3	239
Otu216	38	380	16	11	6	16	40	9	15	12	34	31	38	17	245
Otu217	37	380	44	31	35	52	39	39	49	35	40	36	36	21	457
Otu218	41	378	0	4	2	5	3	9	67	49	31	27	54	62	313
Otu219	37	380	1	2	0	1	0	1	7	6	4	0	40	6	68
Otu220	111	380	1	6	3	4	1	2	42	41	38	10	37	114	299
Otu221	37	376	3	4	8	5	6	3	7	7	6	4	11	37	101
Otu222	38	384	19	29	34	31	35	37	2	2	3	2	7	4	205
Otu223	54	380	61	19	25	13	38	15	3	8	1	4	12	5	204
Otu224	111	381	2	0	0	1	0	8	22	29	41	52	31	116	302
Otu225	72	380	43	50	48	31	53	83	20	19	26	25	21	7	426
Otu226	36	378	0	1	0	0	1	9	4	0	1	8	8	43	75
Otu227	36	380	36	4	1	1	0	1	15	1	1	1	2	0	63
Otu228	77	381	67	66	38	73	57	46	46	58	45	38	60	50	644
Otu229	35	381	14	2	6	20	18	19	18	35	30	19	41	25	247
Otu230	35	380	36	33	27	25	31	19	10	5	8	20	25	7	246
Otu231	49	379	3	17	1	4	37	20	45	50	18	35	34	34	298
Otu232	35	381	4	7	8	3	5	9	8	8	5	3	2	3	65
Otu233	35	377	28	28	30	39	33	46	6	6	13	18	26	7	280
Otu234	79	380	104	63	42	42	23	111	21	18	17	28	7	6	482
Otu235	35	378	0	0	0	0	0	0	0	1	0	0	15	36	52
Otu236	35	380	4	7	3	20	7	6	18	36	18	32	13	16	180
Otu237	35	380	1	5	1	42	14	16	0	0	1	12	6	3	101
Otu238	188	380	30	33	32	52	41	40	2	10	5	8	8	6	267
Otu239	40	381	49	23	35	53	33	27	5	9	3	13	8	6	264
Otu240	34	380	2	1	1	1	2	5	18	53	14	11	44	54	206
Otu241	34	378	11	3	1	7	3	17	30	24	12	19	38	16	181
Otu242	54	380	39	24	34	52	33	30	10	18	15	18	12	5	290
Otu243	43	380	44	24	32	56	33	29	9	6	4	14	11	6	268
Otu244	34	380	33	50	44	44	31	19	1	6	4	6	8	8	254
Otu245	34	378	7	6	5	14	9	14	33	32	17	16	13	47	213
Otu246	34	380	1	0	34	0	3	0	0	1	0	0	1	0	40
Otu247	35	382	7	22	19	9	30	11	14	26	10	2	7	40	197
Otu248	43	380	1	4	2	0	0	1	29	30	22	22	16	65	192
Otu249	33	380	35	0	0	0	0	0	2	0	2	4	0	1	44
Otu250	63	378	22	11	7	18	3	62	10	5	14	33	61	22	268
Otu251	110	378	8	11	38	20	19	13	22	10	22	23	33	14	233
Otu252	38	380	18	24	28	33	33	34	13	10	16	35	42	15	301
Otu253	32	378	18	17	6	10	14	14	29	33	23	14	31	26	235
Otu254	63	380	67	13	8	11	35	6	11	8	6	1	5	1	172
Otu255	39	381	27	16	44	47	19	36	10	14	4	10	13	18	258
Otu256	45	380	20	31	34	27	45	44	4	4	12	14	23	10	268
Otu257	35	380	37	26	27	64	39	22	2	4	0	9	23	10	263
Otu258	32	377	9	18	1	0	15	10	22	32	22	22	18	9	178
Otu259	32	381	46	30	17	46	43	20	7	13	8	15	9	4	258
Otu260	49	378	1	44	41	49	41	34	28	42	43	1	32	41	397
Otu261	32	380	6	17	9	7	11	20	15	29	67	23	86	19	309
Otu262	31	380	3	4	3	4	3	6	1	14	32	18	11	4	103
Otu263	31	379	8	11	15	3	5	11	11	13	12	23	9	31	152
Otu264	31	378	0	0	0	0	0	0	4	33	0	3	17	2	59
Otu265	106	378	25	28	31	31	18	20	27	25	37	23	16	16	297
Otu266	31	382	29	31	24	26	29	28	1	8	6	12	9	1	204
Otu267	30	379	10	18	19	14	12	15	49	46	41	60	16	12	312
Otu268	30	380	4	10	1	2	1	2	18	32	24	31	13	16	154
Otu269	30	379	0	0	0	0	3	0	0	0	0	0	0	31	34
Otu270	99	378	16	28	18	30	21	20	3	13	9	6	4	4	172
Otu271	29	379	16	19	8	10	10	9	9	7	7	10	7	0	112
Otu272	29	379	0	0	0	0	0	0	0	0	0	0	4	29	33
Otu273	28	381	18	25	0	26	23	33	13	15	5	10	15	14	197
Otu274	43	378	29	27	5	20	20	47	7	18	23	34	26	13	269
Otu275	28	380	1	29	21	19	24	17	14	23	23	29	13	19	232
Otu276	35	378	36	4	2	2	20	4	12	15	2	2	18	34	151
Otu277	106	378	0	0	0	1	0	2	1	16	0	42	2	150	214
Otu278	50	379	6	5	0	19	7	13	34	19	44	52	32	19	250
Otu279	28	380	31	27	27	13	20	20	28	24	18	32	20	8	268
Otu280	139	378	0	2	3	0	4	1	28	28	26	22	32	96	242
Otu281	64	377	8	27	6	21	10	16	20	82	28	36	15	6	275
Otu282	28	380	4	2	0	4	1	3	19	13	4	14	3	20	87
Otu283	45	376	12	8	6	20	14	5	50	13	13	35	10	3	189
Otu284	35	380	13	7	6	8	9	22	39	33	28	25	36	38	264
Otu285	28	381	13	14	15	16	13	15	10	8	8	11	11	6	140
Otu286	31	376	14	14	22	32	36	25	7	21	5	12	7	7	202
Otu287	27	381	16	23	15	18	19	29	15	30	16	21	18	28	248
Otu288	27	378	0	0	0	3	0	0	5	5	27	9	7	0	56
Otu289	35	376	5	7	7	4	16	10	32	54	18	25	37	42	257
Otu290	32	378	32	23	76	26	20	65	4	20	7	16	24	19	332
Otu291	80	381	54	60	55	21	41	33	41	35	52	17	36	34	479
Otu292	27	380	19	23	27	21	34	38	8	20	9	15	21	2	237
Otu293	27	378	9	12	8	0	27	17	12	40	9	30	20	8	192
Otu294	31	381	18	28	23	24	45	42	16	7	22	16	17	15	273
Otu295	27	380	0	0	0	0	0	0	9	14	8	8	8	28	75
Otu296	27	380	1	19	2	4	5	4	1	8	2	3	1	1	51
Otu297	27	405	14	5	25	32	29	11	2	1	2	1	9	5	136
Otu298	26	377	1	0	0	4	5	5	11	9	4	7	19	27	92
Otu299	85	379	43	26	33	32	58	59	14	43	31	50	17	7	413
Otu300	26	380	15	18	27	9	30	9	9	7	3	6	5	3	141
Otu301	26	379	0	0	0	1	7	1	25	21	10	7	6	27	105
Otu302	26	381	0	1	0	0	0	0	26	0	0	8	5	26	66
Otu303	26	381	27	23	17	20	21	28	27	18	12	11	24	13	241
Otu304	26	379	22	46	5	18	19	14	25	33	7	1	20	0	210
Otu305	39	380	37	28	23	33	28	35	20	38	33	29	25	10	339
Otu306	30	378	17	25	25	34	27	24	32	31	23	29	28	15	310
Otu307	77	379	16	9	15	6	11	31	11	10	5	19	22	23	178
Otu308	33	381	22	19	23	39	28	44	37	33	14	22	14	8	303
Otu309	51	376	30	46	51	32	48	80	18	20	17	35	86	49	512
Otu310	132	380	28	30	27	27	26	39	17	13	11	18	10	6	252
Otu311	25	380	0	0	0	6	4	3	18	21	12	11	16	25	116
Otu312	25	380	21	5	0	25	11	18	17	0	14	0	0	1	112
Otu313	32	381	15	2	9	6	6	8	35	37	19	31	13	1	182
Otu314	25	380	2	20	26	14	19	10	4	6	1	1	5	4	112
Otu315	25	383	15	12	10	10	6	27	34	27	16	50	7	1	215
Otu316	101	380	4	40	6	16	9	3	31	1	10	7	173	55	355
Otu317	24	378	8	8	8	7	7	16	3	3	9	7	13	3	92
Otu318	24	378	14	7	3	24	15	34	0	0	0	5	0	10	112
Otu319	24	378	1	0	0	0	0	0	3	24	3	6	0	0	37
Otu320	24	381	0	1	0	0	0	6	5	28	7	1	38	24	110
Otu321	24	380	4	1	0	36	6	4	0	0	0	6	0	0	57
Otu322	24	378	0	1	0	4	0	1	6	32	7	4	19	16	90
Otu323	24	378	13	14	12	37	17	0	0	0	0	0	0	2	95
Otu324	27	381	20	26	20	27	14	18	5	6	4	10	10	7	167
Otu325	32	378	63	12	11	9	8	22	40	0	7	13	20	3	208
Otu326	41	381	31	24	12	26	24	11	16	11	12	17	10	5	199
Otu327	26	381	23	22	11	23	23	26	11	51	33	26	34	3	286
Otu328	37	380	13	26	33	17	37	35	10	20	9	18	21	17	256
Otu329	23	376	0	2	0	4	0	8	9	14	0	1	27	29	94
Otu330	23	398	11	11	5	14	14	6	15	24	22	16	2	4	144
Otu331	23	383	0	0	0	0	0	0	25	14	11	14	0	17	81
Otu332	124	379	34	19	38	29	60	24	20	22	18	29	36	18	347
Otu333	23	381	2	2	0	1	0	1	4	4	1	3	1	12	31
Otu334	30	380	9	20	28	15	24	30	10	5	11	7	19	10	188
Otu335	32	380	4	10	10	9	6	3	26	29	29	20	26	54	226
Otu336	34	377	0	0	0	0	0	0	0	22	0	1	26	34	83
Otu337	22	380	0	0	0	0	0	2	3	6	5	1	4	23	44
Otu338	22	381	6	6	23	12	13	12	8	7	6	16	3	9	121
Otu339	22	366	0	0	0	0	0	0	0	0	0	0	22	3	25
Otu340	30	380	32	23	26	48	17	29	14	23	14	20	13	7	266
Otu341	22	378	0	0	0	0	0	0	25	16	12	6	13	22	94
Otu342	38	383	24	17	9	20	23	39	25	20	22	24	29	23	275
Otu343	22	381	0	0	0	0	0	0	5	24	1	0	23	28	81
Otu344	45	378	0	0	0	0	0	0	21	20	17	14	14	22	108
Otu345	25	380	2	25	8	29	25	17	22	12	13	17	9	12	191
Otu346	29	380	14	10	11	22	21	30	2	5	1	11	5	2	134
Otu347	22	380	13	13	5	19	13	23	5	6	4	6	3	2	112
Otu348	22	376	3	1	9	29	16	2	11	5	3	13	23	18	133
Otu349	66	380	38	35	45	47	53	45	22	32	31	38	27	9	422
Otu350	21	379	15	23	14	29	17	28	46	15	10	18	35	29	279
Otu351	21	380	15	7	2	27	10	28	3	26	36	34	49	0	237
Otu352	21	383	4	7	2	9	1	6	15	21	16	22	6	4	113
Otu353	32	379	12	15	34	47	21	51	63	26	18	30	32	49	398
Otu354	21	382	0	0	0	0	0	0	23	20	1	4	0	0	48
Otu355	28	380	23	38	39	28	40	23	9	2	6	24	22	12	266
Otu356	21	379	0	0	23	0	0	0	0	0	0	0	0	0	23
Otu357	21	378	0	0	22	17	1	9	0	1	1	0	6	3	60
Otu358	48	382	23	18	13	13	12	7	26	28	25	28	35	15	243
Otu359	24	380	0	2	0	0	1	0	24	10	12	21	14	5	89
Otu360	21	380	10	9	13	14	22	3	2	2	0	2	0	6	83
Otu361	49	380	23	23	13	27	29	33	17	16	18	23	10	4	236
Otu362	21	380	20	15	5	6	21	2	5	13	3	15	8	4	117
Otu363	21	381	9	2	1	6	6	3	10	6	25	11	12	1	92
Otu364	21	378	0	1	0	0	0	0	3	18	4	6	21	1	54
Otu365	87	378	10	50	6	9	116	9	0	0	3	2	38	19	262
Otu366	21	377	5	19	19	29	25	25	8	9	1	2	14	6	162
Otu367	21	384	16	22	17	14	13	22	12	6	16	13	13	6	170
Otu368	44	376	40	5	1	4	0	9	1	0	0	45	3	0	108
Otu369	20	379	0	4	0	0	20	0	0	1	0	0	0	0	25
Otu370	20	380	9	8	1	4	8	7	8	11	24	21	4	11	116
Otu371	49	380	34	0	4	0	7	3	21	37	24	38	53	24	245
Otu372	35	381	16	33	41	41	48	19	24	19	12	19	14	6	292
Otu373	20	378	0	0	0	0	0	0	6	3	3	6	0	20	38
Otu374	20	380	3	10	2	20	10	1	20	5	8	0	0	6	85
Otu375	20	380	4	9	2	6	8	14	4	23	4	14	20	4	112
Otu376	30	380	14	10	18	24	10	9	13	8	6	10	10	2	134
Otu377	20	380	5	6	5	4	4	5	9	20	9	9	8	4	88
Otu378	27	382	30	19	22	29	18	27	3	2	5	4	12	8	179
Otu379	20	380	20	12	7	12	8	30	1	1	1	2	3	0	97
Otu380	37	378	0	0	0	1	0	2	28	40	1	0	16	49	137
Otu381	20	379	1	3	4	2	10	5	35	27	20	41	18	22	188
Otu382	22	380	21	14	30	20	17	17	10	7	13	15	7	12	183
Otu383	20	379	2	1	3	0	1	0	20	6	13	11	4	1	62
Otu384	59	378	30	36	52	33	55	52	34	38	19	37	43	4	433
Otu385	20	380	0	0	0	0	1	0	7	2	5	0	0	7	22
Otu386	22	379	3	6	9	12	7	17	9	22	1	20	15	16	137
Otu387	19	379	0	0	0	0	0	0	1	1	2	12	21	19	56
Otu388	26	379	0	1	0	0	0	2	11	19	4	14	23	46	120
Otu389	19	380	6	5	1	12	2	5	7	3	7	5	3	1	57
Otu390	19	370	0	0	19	0	0	0	1	0	0	7	0	0	27
Otu391	34	381	34	38	21	15	35	21	37	21	12	17	14	17	282
Otu392	158	378	39	26	29	34	31	15	55	52	43	50	18	10	402
Otu393	28	380	18	2	1	43	28	18	3	2	0	8	8	1	132
Otu394	128	379	1	1	20	34	1	27	11	14	6	3	24	137	279
Otu395	51	382	6	17	13	5	7	5	39	37	19	34	29	53	264
Otu396	26	380	13	25	30	9	28	22	3	5	5	9	7	5	161
Otu397	19	381	19	10	25	14	14	8	1	1	2	2	5	1	102
Otu398	19	380	8	8	16	8	12	9	0	4	14	5	11	6	101
Otu399	19	378	11	9	5	21	20	7	24	11	20	16	13	3	160
Otu400	19	376	4	2	8	2	0	19	3	10	0	2	4	4	58
Otu401	25	380	26	27	17	19	15	7	6	15	0	12	0	2	146
Otu402	28	378	2	2	4	3	2	7	34	29	6	22	6	11	128
Otu403	18	379	7	2	3	5	2	1	4	1	2	1	2	1	31
Otu404	18	378	0	0	1	3	0	0	0	0	0	18	0	0	22
Otu405	93	377	14	18	12	13	18	24	30	11	15	20	41	28	244
Otu406	18	378	17	17	8	25	18	12	0	7	2	4	5	3	118
Otu407	25	380	2	0	0	1	0	0	17	27	40	12	33	2	134
Otu408	90	380	0	0	0	0	0	1	1	8	0	0	15	122	147
Otu409	67	377	31	25	20	32	11	7	9	5	2	14	12	4	172
Otu410	44	380	27	33	55	37	37	5	17	12	7	19	10	18	277
Otu411	27	378	6	9	3	7	13	4	24	29	24	39	13	27	198
Otu412	71	381	10	13	18	29	16	20	35	7	15	19	14	4	200
Otu413	94	376	0	0	0	0	0	3	6	21	26	10	9	45	120
Otu414	18	380	4	12	11	20	9	6	1	3	0	2	3	2	73
Otu415	43	379	10	4	0	5	6	7	7	21	12	13	22	9	116
Otu416	25	380	1	4	3	1	0	1	21	19	24	25	8	8	115
Otu417	84	378	24	9	21	22	13	9	12	13	20	30	15	14	202
Otu418	28	380	24	20	20	47	23	26	5	13	12	9	8	2	209
Otu419	45	381	52	25	5	18	17	5	0	8	5	0	18	0	153
Otu420	21	380	25	3	4	18	32	17	1	0	0	5	8	3	116
Otu421	17	383	5	2	13	9	13	22	5	12	0	16	16	1	114
Otu422	17	379	18	6	4	1	2	7	6	3	1	3	0	0	51
Otu423	17	381	6	9	11	7	7	6	3	4	1	3	4	1	62
Otu424	38	381	19	18	16	0	6	7	3	9	14	21	17	1	131
Otu425	22	397	21	17	21	22	18	18	2	3	3	6	8	2	141
Otu426	18	379	10	10	3	14	1	18	12	12	13	36	0	8	137
Otu427	17	380	0	8	1	0	20	0	0	0	0	0	0	2	31
Otu428	17	376	0	0	0	0	0	0	14	0	3	0	0	1	18
Otu429	46	381	24	33	12	30	18	10	22	19	8	20	13	5	214
Otu430	74	378	9	25	19	16	35	18	19	13	11	24	27	23	239
Otu431	29	382	8	14	7	18	11	14	8	5	3	12	6	9	115
Otu432	17	382	10	0	13	18	7	5	0	2	0	1	1	0	57
Otu433	17	400	11	14	12	6	21	13	7	2	15	13	8	2	124
Otu434	94	379	40	38	38	39	27	46	58	104	44	56	44	83	617
Otu435	44	378	19	12	10	27	20	18	9	20	12	11	21	8	187
Otu436	16	381	5	12	12	17	3	10	5	10	9	7	4	10	104
Otu437	16	376	6	0	1	3	4	1	1	7	5	2	11	17	58
Otu438	17	381	16	1	0	1	4	0	19	14	6	10	16	26	113
Otu439	29	378	25	12	16	8	3	15	16	22	27	24	15	11	194
Otu440	16	380	0	4	1	0	3	4	11	13	13	12	17	4	82
Otu441	16	380	0	2	0	1	0	1	18	12	10	12	2	4	62
Otu442	16	378	12	14	16	13	7	10	9	6	4	11	7	8	117
Otu443	16	381	1	4	3	1	19	1	18	14	15	10	5	3	94
Otu444	16	381	0	0	0	1	0	0	6	6	16	7	0	0	36
Otu445	47	380	23	14	14	13	13	8	12	8	3	4	6	9	127
Otu446	16	378	1	13	16	6	0	0	1	0	0	4	5	2	48
Otu447	54	380	0	2	0	3	0	3	22	32	20	19	21	72	194
Otu448	17	380	18	13	9	6	36	3	21	16	11	18	1	5	157
Otu449	31	378	16	26	24	14	32	16	5	24	13	11	0	10	191
Otu450	20	376	4	3	3	7	7	11	20	22	13	17	20	17	144
Otu451	52	380	4	6	1	10	7	0	20	11	11	18	15	1	104
Otu452	15	381	7	15	3	2	3	2	2	0	0	1	0	5	40
Otu453	15	376	11	12	7	15	5	10	7	4	1	15	6	2	95
Otu454	26	382	27	28	48	18	19	36	11	8	6	9	2	6	218
Otu455	52	379	19	12	12	14	26	21	16	37	14	25	12	9	217
Otu456	29	380	20	24	20	32	22	20	16	16	17	21	17	13	238
Otu457	15	376	3	1	1	1	1	1	13	4	4	10	9	2	50
Otu458	31	381	7	4	3	7	13	11	20	22	31	15	26	21	180
Otu459	31	380	16	28	19	19	22	11	9	10	8	13	10	7	172
Otu460	15	378	5	9	6	4	2	5	8	16	12	13	8	11	99
Otu461	59	381	0	0	0	0	0	0	13	15	15	9	1	60	113
Otu462	29	381	19	50	17	38	5	24	15	19	3	28	17	13	248
Otu463	27	380	5	9	3	17	2	6	17	29	14	16	10	14	142
Otu464	40	380	22	34	22	30	24	26	15	14	8	23	15	21	254
Otu465	15	381	4	0	18	11	0	1	3	10	1	5	3	0	56
Otu466	56	380	2	0	0	0	0	0	15	46	4	7	15	58	147
Otu467	15	379	6	10	3	9	14	10	9	6	9	17	6	11	110
Otu468	15	379	3	2	1	2	5	1	7	20	4	8	9	12	74
Otu469	15	378	7	2	6	6	9	2	20	16	13	23	21	11	136
Otu470	18	380	2	4	4	4	2	1	10	21	16	6	0	0	70
Otu471	15	380	8	4	1	9	10	11	8	9	16	2	5	4	87
Otu472	16	379	3	1	9	4	3	1	8	18	4	17	7	12	87
Otu473	24	379	16	18	23	17	10	8	5	5	4	5	9	4	124
Otu474	30	380	15	18	13	16	15	15	2	2	1	0	3	3	103
Otu475	27	381	0	0	0	0	4	0	30	7	8	15	2	2	68
Otu476	15	379	4	5	1	4	3	5	6	11	7	8	8	7	69
Otu477	48	378	0	0	0	0	0	1	18	15	16	15	17	49	131
Otu478	35	381	9	18	12	17	27	13	3	5	1	4	3	4	116
Otu479	46	379	1	38	52	43	6	14	20	17	14	7	15	9	236
Otu480	14	380	8	8	9	9	14	5	4	3	14	13	11	2	100
Otu481	32	382	10	21	12	20	9	19	29	17	20	19	5	3	184
Otu482	28	380	18	3	16	13	9	1	5	13	8	8	2	4	100
Otu483	14	376	0	3	0	1	4	1	8	5	14	13	10	13	72
Otu484	35	376	0	0	0	0	0	0	14	13	4	5	7	7	50
Otu485	14	381	3	2	0	3	0	0	4	14	2	11	0	2	41
Otu486	30	380	23	21	23	32	43	35	15	11	14	18	19	17	271
Otu487	14	380	3	1	2	2	2	1	14	2	6	8	3	0	44
Otu488	62	381	20	42	23	34	29	39	22	21	23	21	29	4	307
Otu489	14	382	4	0	0	4	2	1	10	4	2	6	1	10	44
Otu490	14	374	0	0	1	1	0	0	4	3	0	2	1	14	26
Otu491	28	381	14	22	23	6	9	9	32	21	12	16	17	13	194
Otu492	18	378	15	2	4	9	7	11	15	17	6	19	26	17	148
Otu493	67	380	16	14	12	16	17	8	0	7	1	0	10	2	103
Otu494	15	380	0	0	0	0	0	1	13	7	16	15	4	11	67
Otu495	17	381	0	0	0	0	0	0	15	5	0	8	0	18	46
Otu496	14	378	1	0	6	4	5	4	3	10	4	6	5	4	52
Otu497	14	382	0	5	2	0	0	6	14	4	14	6	4	1	56
Otu498	20	379	5	7	8	9	2	11	13	15	22	14	13	22	141
Otu499	42	376	19	11	12	1	6	19	1	37	0	14	19	5	144
Otu500	14	380	4	9	14	10	13	6	1	0	0	0	1	1	59
Otu501	14	377	0	0	2	0	14	0	0	8	0	0	0	0	24
Otu502	15	381	1	2	1	0	9	3	17	14	14	13	3	9	86
Otu503	14	382	0	0	0	0	0	0	0	4	0	0	14	0	18
Otu504	14	380	0	0	1	0	0	1	5	5	15	9	3	5	44
Otu505	14	379	0	0	0	0	0	0	4	10	9	4	0	0	27
Otu506	14	380	14	11	2	11	8	3	3	3	3	3	3	1	65
Otu507	34	380	0	1	0	3	4	3	16	16	12	13	5	23	96
Otu508	13	382	0	0	0	0	2	0	2	8	1	9	14	15	51
Otu509	13	380	3	1	0	0	0	13	0	0	0	13	6	0	36
Otu510	13	399	0	2	0	2	9	13	0	2	4	5	4	4	45
Otu511	18	383	2	6	13	7	14	13	12	7	15	4	33	6	132
Otu512	15	381	13	0	0	0	0	18	2	0	0	15	0	0	48
Otu513	13	376	0	0	4	2	0	0	11	7	13	2	0	2	41
Otu514	23	381	22	25	28	20	14	11	8	16	6	15	12	3	180
Otu515	13	381	0	9	0	5	11	0	17	0	4	12	0	2	60
Otu516	25	378	2	6	14	5	7	20	2	9	0	0	3	4	72
Otu517	13	378	0	0	0	0	0	0	0	4	2	0	1	6	13
Otu518	13	381	2	5	4	5	1	2	0	0	0	4	1	0	24
Otu519	40	380	43	52	41	31	21	22	14	4	11	26	13	13	291
Otu520	16	380	1	14	11	6	9	9	24	13	7	15	10	9	128
Otu521	20	378	10	8	13	13	14	13	7	4	1	2	7	2	94
Otu522	15	380	4	7	3	4	14	11	8	15	12	24	7	13	122
Otu523	76	381	0	0	0	10	2	17	25	19	17	25	29	24	168
Otu524	36	381	26	19	4	33	8	52	42	28	42	23	12	13	302
Otu525	63	379	7	13	6	21	9	14	28	28	22	31	19	8	206
Otu526	19	378	19	1	8	11	10	8	1	3	1	1	0	0	63
Otu527	23	401	14	13	11	11	11	23	24	17	46	31	19	10	230
Otu528	14	382	6	10	6	9	9	7	1	8	4	13	13	7	93
Otu529	56	379	0	3	4	0	0	0	5	73	8	3	1	5	102
Otu530	13	381	7	13	1	12	1	28	0	3	2	8	11	7	93
Otu531	20	378	5	6	10	7	3	9	7	9	9	16	9	4	94
Otu532	29	383	18	21	5	21	6	17	30	29	12	19	23	9	210
Otu533	13	378	11	1	12	1	4	0	4	1	5	3	0	1	43
Otu534	23	381	7	7	8	14	9	8	19	22	13	20	3	4	134
Otu535	13	383	5	10	8	11	9	5	2	3	2	13	2	4	74
Otu536	47	380	0	16	4	16	10	4	16	12	20	8	15	18	139
Otu537	12	381	0	0	1	0	0	1	4	4	2	0	13	13	38
Otu538	22	379	31	3	7	10	4	31	15	10	0	13	21	17	162
Otu539	20	380	19	22	20	19	21	21	1	6	0	1	6	3	139
Otu540	20	381	13	13	4	6	7	16	8	9	16	14	12	1	119
Otu541	12	378	0	1	1	0	1	0	8	12	9	4	1	4	41
Otu542	12	380	0	1	0	0	0	0	0	0	0	0	3	13	17
Otu543	12	376	2	0	0	0	0	13	0	0	0	1	0	0	16
Otu544	12	379	1	3	11	13	0	1	4	7	0	0	5	0	45
Otu545	12	379	5	5	3	4	1	4	1	0	0	0	2	0	25
Otu546	12	385	7	3	1	1	2	5	1	4	0	1	2	0	27
Otu547	12	381	0	1	5	1	1	6	8	6	3	5	8	12	56
Otu548	12	381	8	2	8	12	8	13	0	1	0	0	0	2	54
Otu549	16	380	16	9	13	18	14	7	2	4	2	2	4	2	93
Otu550	51	378	6	4	6	14	10	18	13	25	14	9	12	2	133
Otu551	12	379	5	6	14	19	5	13	4	3	6	5	5	6	91
Otu552	12	376	13	13	2	6	0	10	2	5	2	0	0	0	53
Otu553	12	381	0	0	0	0	0	0	3	0	0	0	0	13	16
Otu554	12	381	13	9	12	1	3	8	6	3	11	3	7	0	76
Otu555	12	378	13	8	6	4	7	3	2	3	0	7	3	2	58
Otu556	133	382	9	16	20	14	26	12	12	13	11	15	19	14	181
Otu557	12	382	0	0	0	2	0	2	13	4	7	6	1	0	35
Otu558	13	376	0	0	0	4	0	2	4	2	3	27	1	0	43
Otu559	24	376	0	0	0	0	0	1	9	4	9	15	0	3	41
Otu560	15	380	16	9	13	5	15	4	9	14	14	11	4	0	114
Otu561	30	379	5	5	9	11	12	6	14	32	15	16	12	8	145
Otu562	24	376	29	0	1	3	2	11	33	1	2	13	4	0	99
Otu563	22	380	15	10	24	14	16	6	3	11	4	16	12	7	138
Otu564	12	380	0	0	0	0	0	0	1	0	0	0	0	12	13
Otu565	12	377	4	7	4	12	3	8	11	7	6	12	5	8	87
Otu566	12	377	6	5	11	8	20	4	0	0	1	0	0	2	57
Otu567	50	381	1	12	15	1	13	4	33	17	16	19	30	35	196
Otu568	12	376	0	0	0	0	0	0	1	9	2	1	6	12	31
Otu569	24	380	8	10	8	4	12	8	7	4	7	6	12	3	89
Otu570	12	380	3	1	2	4	1	2	1	1	1	1	1	0	18
Otu571	16	380	16	22	18	25	26	5	17	7	4	14	10	3	167
Otu572	12	382	2	0	1	1	0	2	14	17	3	2	13	21	76
Otu573	47	380	0	0	0	0	0	0	3	11	1	4	18	70	107
Otu574	28	378	33	8	13	13	14	6	2	1	0	19	4	2	115
Otu575	12	380	0	0	1	0	1	2	3	5	2	0	5	9	28
Otu576	39	380	30	20	20	29	26	35	14	17	7	5	21	6	230
Otu577	49	376	5	3	4	7	1	16	14	27	7	19	22	8	133
Otu578	12	378	3	15	3	1	3	8	3	4	1	1	14	8	64
Otu579	183	380	34	24	38	12	8	103	16	12	14	7	54	39	361
Otu580	94	381	27	13	23	21	13	18	7	4	2	3	7	8	146
Otu581	34	376	1	5	1	0	4	0	2	15	5	2	24	29	88
Otu582	15	380	2	0	3	2	0	3	11	16	5	11	1	0	54
Otu583	13	381	11	11	5	29	12	26	12	11	9	20	12	4	162
Otu584	15	380	1	8	2	5	4	10	9	7	5	8	14	15	88
Otu585	18	376	3	0	0	0	0	0	3	4	16	15	1	1	43
Otu586	17	378	7	9	1	3	0	4	21	23	14	20	21	31	154
Otu587	34	379	14	11	13	15	12	25	6	10	3	7	17	18	151
Otu588	44	377	2	14	11	20	6	4	0	1	1	2	1	3	65
Otu589	11	380	8	12	1	6	4	6	6	4	7	10	7	3	74
Otu590	11	380	6	11	8	1	0	0	4	0	0	0	4	5	39
Otu591	48	380	13	4	4	5	5	3	4	23	6	13	10	5	95
Otu592	11	380	9	3	5	12	6	11	11	2	4	12	4	1	80
Otu593	11	383	0	1	2	0	12	1	4	4	0	4	3	2	33
Otu594	38	382	23	29	23	19	18	29	22	28	25	40	46	57	359
Otu595	11	380	0	0	0	0	0	0	0	6	1	0	6	5	18
Otu596	11	380	0	0	0	0	1	0	14	0	6	3	0	1	25
Otu597	11	269	0	0	11	0	0	0	0	0	0	0	0	0	11
Otu598	11	382	7	10	5	11	4	6	3	4	1	3	1	1	56
Otu599	15	380	7	8	11	8	4	12	5	7	8	13	15	11	109
Otu600	11	380	8	9	5	11	3	2	1	0	2	1	2	0	44
Otu601	11	378	0	0	0	0	0	0	5	8	4	6	9	11	43
Otu602	11	380	6	0	0	0	3	0	2	0	5	11	4	0	31
Otu603	17	382	15	8	11	14	12	18	6	2	9	4	9	3	111
Otu604	12	380	0	8	0	1	8	0	15	7	0	12	10	12	73
Otu605	11	378	0	6	9	1	7	0	14	0	0	0	11	9	57
Otu606	22	381	0	0	0	0	0	0	8	12	23	16	9	1	69
Otu607	27	380	2	3	1	2	4	10	20	27	11	29	14	8	131
Otu608	34	378	0	2	2	3	2	3	6	13	8	11	9	0	59
Otu609	11	379	5	4	15	2	4	7	0	0	3	4	2	4	50
Otu610	26	380	3	4	12	7	12	5	5	2	4	5	2	2	63
Otu611	25	380	2	7	1	4	9	3	11	26	12	38	26	4	143
Otu612	46	380	10	5	5	13	6	6	16	16	8	10	8	24	127
Otu613	26	376	3	2	5	12	4	8	22	10	11	25	13	0	115
Otu614	55	380	4	10	5	3	9	11	0	9	8	10	7	11	87
Otu615	12	378	5	3	10	6	9	9	7	9	5	2	13	3	81
Otu616	10	377	1	4	3	2	1	9	1	0	1	2	1	0	25
Otu617	30	380	10	10	2	6	3	3	11	10	37	21	7	4	124
Otu618	10	379	0	0	0	0	0	0	1	3	0	0	2	11	17
Otu619	176	374	0	0	0	0	2	0	10	0	2	53	6	177	250
Otu620	10	380	7	15	13	12	14	7	13	6	9	10	9	3	118
Otu621	10	378	7	1	1	4	2	5	2	1	0	2	0	0	25
Otu622	11	379	15	13	11	20	9	19	2	4	0	1	5	1	100
Otu623	10	382	0	0	0	0	0	0	10	0	3	4	0	5	22
Otu624	15	382	6	9	10	5	7	5	5	10	10	15	2	2	86
Otu625	13	380	4	2	2	7	0	5	11	14	11	6	11	13	86
Otu626	10	379	2	4	8	3	6	5	0	2	1	3	3	2	39
Otu627	14	383	7	1	1	0	0	5	2	11	9	0	4	5	45
Otu628	10	379	4	7	5	1	10	7	3	4	3	3	1	1	49
Otu629	10	380	10	4	2	0	1	6	4	1	0	0	0	0	28
Otu630	16	380	15	6	11	10	11	4	5	2	1	5	6	2	78
Otu631	10	384	0	3	0	0	1	0	5	10	4	10	4	7	44
Otu632	42	378	6	31	27	13	21	30	28	29	30	36	78	38	367
Otu633	17	382	6	10	12	6	17	5	20	13	23	22	9	8	151
Otu634	22	376	5	9	23	11	17	10	6	6	2	2	3	3	97
Otu635	10	383	1	4	1	0	0	0	10	9	9	8	0	10	52
Otu636	44	380	2	0	4	0	6	0	6	10	10	11	0	8	57
Otu637	55	378	1	22	18	10	6	0	3	0	5	9	28	0	102
Otu638	10	376	0	4	1	4	3	10	1	5	0	2	1	0	31
Otu639	10	381	0	1	0	0	1	2	2	2	1	1	2	1	13
Otu640	14	382	0	0	0	0	0	1	9	4	7	10	7	14	52
Otu641	14	380	1	4	3	0	1	0	14	10	10	12	1	1	57
Otu642	10	381	1	0	0	1	1	3	4	7	1	8	10	6	42
Otu643	10	376	0	0	0	2	0	0	10	2	2	1	0	0	17
Otu644	19	380	1	2	7	4	5	10	19	3	19	9	10	2	91
Otu645	15	379	5	6	25	7	9	0	12	12	8	10	4	3	101
Otu646	10	380	0	0	0	0	0	0	0	3	0	3	5	2	13
Otu647	35	379	22	14	19	21	9	15	3	2	1	6	3	2	117
Otu648	31	380	1	3	1	2	0	1	5	10	4	3	10	13	53
Otu649	10	378	0	0	0	1	1	0	6	11	4	2	8	17	50
Otu650	29	377	3	0	0	0	0	0	10	15	2	6	31	29	96
Otu651	23	379	3	4	12	4	10	4	0	0	0	0	2	1	40
Otu652	25	380	11	7	8	11	2	6	13	13	2	17	7	1	98
Otu653	11	377	0	0	2	0	0	0	11	6	8	12	1	8	48
Otu654	23	381	6	11	9	12	7	27	8	5	1	11	6	7	110
Otu655	43	379	3	2	2	7	4	0	8	10	17	10	8	1	72
Otu656	23	380	7	18	7	19	14	24	0	14	4	11	11	10	139
Otu657	13	381	1	1	0	1	7	6	14	0	1	11	18	8	68
Otu658	48	378	57	30	22	24	26	17	12	11	11	12	16	11	249
Otu659	13	380	2	10	7	8	9	11	4	7	7	1	15	2	83
Otu660	12	382	12	6	5	10	2	4	1	0	1	0	1	0	42
Otu661	11	378	0	0	0	0	3	1	11	6	4	3	6	10	44
Otu662	17	383	7	5	4	5	8	5	7	5	5	11	1	0	63
Otu663	13	380	0	0	0	0	1	1	4	9	4	12	3	0	34
Otu664	9	380	0	0	0	0	0	1	4	2	0	0	0	9	16
Otu665	30	376	14	15	5	17	11	12	0	4	3	15	12	0	108
Otu666	10	378	0	0	0	0	0	0	10	2	19	3	1	0	35
Otu667	9	376	6	2	0	5	1	9	0	0	0	1	0	0	24
Otu668	48	379	0	7	0	0	0	0	4	12	0	5	9	60	97
Otu669	9	382	11	10	13	16	13	9	3	2	0	6	9	1	93
Otu670	10	380	7	10	10	14	5	6	3	4	3	2	9	6	79
Otu671	19	385	16	14	20	38	9	26	2	9	0	6	5	0	145
Otu672	25	380	7	16	9	34	22	28	4	7	7	5	5	0	144
Otu673	12	381	2	2	12	2	9	9	0	2	0	0	2	0	40
Otu674	15	376	13	0	0	0	0	0	9	15	0	9	8	16	70
Otu675	10	380	9	10	12	10	4	1	5	4	3	9	3	4	74
Otu676	11	381	5	9	0	8	4	11	4	2	0	4	10	2	59
Otu677	43	399	0	4	6	1	5	0	9	10	24	14	5	1	79
Otu678	9	380	10	2	8	9	5	7	0	1	1	1	1	1	46
Otu679	18	385	10	18	15	19	5	2	4	3	4	1	18	16	115
Otu680	9	381	5	5	16	5	9	9	2	0	2	3	5	3	64
Otu681	17	378	4	6	2	3	0	5	3	6	8	14	13	4	68
Otu682	190	380	0	194	12	1	0	3	16	1	7	2	68	0	304
Otu683	9	378	7	0	0	2	0	0	8	11	3	9	5	9	54
Otu684	15	378	10	4	3	2	4	6	8	9	3	10	6	4	69
Otu685	14	380	5	3	2	16	10	8	9	3	0	1	1	0	58
Otu686	9	376	0	0	0	0	0	0	0	0	1	3	9	6	19
Otu687	19	379	8	12	9	7	7	10	1	1	1	0	3	0	59
Otu688	64	376	0	1	0	0	0	8	11	7	7	20	12	73	139
Otu689	9	381	3	3	6	6	11	9	0	0	0	0	1	0	39
Otu690	18	381	6	10	6	8	2	9	9	6	12	9	13	4	94
Otu691	12	380	5	6	3	12	6	0	3	6	9	11	3	1	65
Otu692	9	358	9	0	0	0	0	0	0	0	0	0	0	0	9
Otu693	12	380	10	7	5	13	10	4	7	2	2	7	1	1	69
Otu694	9	379	4	4	3	2	3	2	0	1	0	0	2	0	21
Otu695	21	376	3	0	6	1	11	16	17	5	0	11	14	0	84
Otu696	11	380	5	4	7	11	9	5	2	2	1	4	1	2	53
Otu697	26	378	6	7	0	0	29	3	0	0	1	0	0	26	72
Otu698	91	379	2	37	8	7	103	5	9	13	15	11	2	1	213
Otu699	9	381	0	2	0	1	0	1	0	7	0	0	9	16	36
Otu700	27	380	22	5	0	3	13	3	26	9	30	8	24	12	155
Otu701	8	378	3	5	9	3	1	3	2	3	3	6	2	2	42
Otu702	17	380	4	9	8	10	16	7	1	0	0	3	2	1	61
Otu703	19	380	9	31	10	8	11	7	16	1	4	10	22	19	148
Otu704	8	381	0	2	1	1	1	1	2	1	5	2	0	0	16
Otu705	61	381	10	54	2	11	27	19	65	42	0	5	0	2	237
Otu706	12	376	7	12	10	6	17	13	0	3	1	6	4	1	80
Otu707	21	380	7	8	7	11	13	15	9	6	10	15	6	28	135
Otu708	10	380	10	8	10	6	6	3	2	5	6	6	4	3	69
Otu709	53	380	0	0	0	1	0	0	2	4	115	3	1	0	126
Otu710	8	380	2	0	0	4	4	1	0	0	0	1	0	0	12
Otu711	29	380	4	8	5	7	4	11	2	5	2	3	4	8	63
Otu712	8	380	1	2	1	0	2	1	8	2	2	4	2	4	29
Otu713	26	381	8	19	34	37	5	2	0	0	2	0	1	5	113
Otu714	8	380	0	1	0	2	0	1	2	11	1	6	1	8	33
Otu715	16	378	1	0	2	2	1	1	10	1	6	8	0	7	39
Otu716	17	381	21	6	19	20	23	8	14	25	11	20	9	21	197
Otu717	11	380	6	8	5	10	6	12	4	3	7	4	9	2	76
Otu718	19	378	4	0	6	8	2	5	1	5	5	13	7	5	61
Otu719	81	380	16	13	0	2	13	15	6	5	24	30	23	1	148
Otu720	8	378	0	3	3	0	0	0	2	8	0	1	0	1	18
Otu721	10	381	5	10	13	10	9	8	3	10	1	5	9	5	88
Otu722	10	381	9	0	14	0	2	10	7	8	0	1	4	10	65
Otu723	8	380	3	5	8	3	5	0	0	0	1	1	0	2	28
Otu724	8	381	0	0	0	0	0	1	0	8	0	0	1	0	10
Otu725	10	378	2	1	2	0	1	2	8	3	1	2	2	1	25
Otu726	16	380	0	0	0	0	1	0	2	9	1	8	9	14	44
Otu727	21	380	6	28	9	27	26	25	3	12	15	23	16	3	193
Otu728	23	379	10	11	2	11	18	8	7	27	4	5	16	5	124
Otu729	12	378	19	3	9	2	17	5	3	2	2	6	3	4	75
Otu730	36	381	0	0	0	0	0	0	3	5	4	4	16	47	79
Otu731	34	380	16	8	17	16	6	6	5	10	4	8	8	5	109
Otu732	13	380	2	7	4	3	13	4	2	8	3	1	7	3	57
Otu733	8	380	7	3	1	2	4	6	5	8	2	2	4	2	46
Otu734	9	384	8	8	7	7	7	5	0	0	2	0	5	2	51
Otu735	8	379	2	5	6	4	4	14	4	3	10	1	6	2	61
Otu736	8	376	5	6	2	2	3	3	0	0	0	0	0	0	21
Otu737	13	378	5	6	8	15	8	8	11	5	3	9	8	5	91
Otu738	26	380	0	0	0	0	0	3	12	0	29	12	0	0	56
Otu739	35	380	0	14	3	3	10	10	9	5	14	13	4	3	88
Otu740	8	380	2	0	1	2	1	0	1	5	8	7	4	0	31
Otu741	18	381	8	7	15	14	15	6	2	0	3	0	1	1	72
Otu742	30	380	25	23	8	13	11	5	1	32	7	21	9	2	157
Otu743	45	380	3	5	0	1	3	4	21	18	8	21	20	17	121
Otu744	12	380	8	5	4	4	12	8	2	0	0	1	1	0	45
Otu745	10	380	5	5	2	9	5	8	0	0	0	0	2	2	38
Otu746	9	378	0	0	1	2	3	0	9	5	4	8	1	2	35
Otu747	17	382	4	13	14	2	15	5	5	7	9	8	8	4	94
Otu748	8	381	1	3	4	0	3	0	3	0	0	0	0	0	14
Otu749	8	380	1	2	2	0	4	7	0	2	0	2	3	0	23
Otu750	15	380	4	6	0	15	7	8	1	0	0	0	0	0	41
Otu751	13	380	0	0	0	0	0	0	9	8	7	6	3	21	54
Otu752	32	380	8	5	5	5	7	16	2	4	1	1	3	0	57
Otu753	13	376	0	0	0	7	2	0	0	9	8	13	9	2	50
Otu754	8	378	0	8	0	1	3	3	0	0	0	1	1	0	17
Otu755	8	381	1	1	0	5	3	3	2	5	3	1	11	1	36
Otu756	8	373	0	0	0	8	0	0	0	0	0	0	0	0	8
Otu757	9	380	2	9	5	0	1	9	0	1	0	8	5	1	41
Otu758	19	384	0	0	0	0	0	0	10	9	4	14	7	44	88
Otu759	8	381	6	7	1	10	0	3	3	3	1	0	5	3	42
Otu760	8	377	4	4	2	7	2	17	4	0	0	5	4	0	49
Otu761	8	379	0	10	5	0	7	6	2	0	0	0	0	2	32
Otu762	23	380	23	25	12	24	9	18	2	4	3	7	9	2	138
Otu763	8	384	2	0	0	8	1	1	0	5	0	1	1	0	19
Otu764	42	380	0	0	0	1	1	2	9	42	11	16	2	0	84
Otu765	8	383	3	9	9	3	5	1	0	1	0	1	0	1	33
Otu766	10	380	8	7	10	11	9	10	4	1	1	6	3	1	71
Otu767	10	382	8	5	0	0	2	6	3	1	0	6	1	1	33
Otu768	25	379	4	3	4	3	7	11	10	7	4	7	9	4	73
Otu769	10	381	4	8	5	11	5	2	2	2	1	7	7	3	57
Otu770	10	380	0	8	1	4	5	9	1	0	0	1	1	0	30
Otu771	18	380	9	13	16	12	9	7	10	12	9	8	6	10	121
Otu772	7	376	7	0	8	0	0	2	3	0	0	0	0	0	20
Otu773	7	380	2	3	5	7	3	4	5	5	5	4	2	2	47
Otu774	14	379	6	23	12	3	1	17	0	9	4	14	2	0	91
Otu775	7	376	7	2	0	3	0	0	14	0	1	7	3	9	46
Otu776	23	380	6	5	4	8	4	5	8	2	4	8	0	2	56
Otu777	20	381	12	4	1	9	1	18	20	11	7	1	0	0	84
Otu778	12	382	6	2	1	5	1	3	0	0	2	7	1	0	28
Otu779	21	380	7	7	0	5	8	14	20	19	4	11	7	1	103
Otu780	12	379	12	2	1	20	0	9	4	4	3	3	6	7	71
Otu781	18	380	0	1	0	1	0	1	8	7	4	8	3	10	43
Otu782	20	380	5	7	3	7	7	0	6	9	1	5	8	5	63
Otu783	10	380	2	3	3	3	0	3	1	6	1	9	15	2	48
Otu784	7	380	1	0	4	0	1	2	5	3	4	0	2	3	25
Otu785	7	380	0	0	0	0	0	0	5	4	1	7	0	6	23
Otu786	11	382	2	4	8	4	1	7	14	2	5	2	7	11	67
Otu787	7	382	0	7	0	6	3	6	0	4	1	1	2	0	30
Otu788	7	380	2	9	0	4	3	5	2	1	2	2	8	1	39
Otu789	7	379	0	1	0	0	0	0	3	5	2	1	3	3	18
Otu790	21	380	0	0	1	0	1	5	7	20	4	2	21	23	84
Otu791	8	380	7	5	12	5	5	0	8	0	3	4	1	1	51
Otu792	10	380	7	7	9	7	11	1	0	6	0	6	4	0	58
Otu793	12	380	9	14	6	15	14	8	0	2	0	3	3	1	75
Otu794	10	380	5	3	4	9	9	2	6	2	4	4	0	1	49
Otu795	7	380	7	2	12	5	3	3	2	4	1	1	1	6	47
Otu796	11	380	0	0	0	0	0	0	1	12	1	0	5	7	26
Otu797	7	375	0	0	0	0	7	0	0	0	0	0	0	0	7
Otu798	123	378	13	17	10	22	8	13	10	23	17	9	11	6	159
Otu799	10	380	0	2	4	7	7	2	0	2	2	1	1	0	28
Otu800	16	381	4	8	11	12	11	4	4	1	4	11	2	3	75
Otu801	8	378	4	3	4	8	5	6	3	0	3	7	2	1	46
Otu802	7	382	0	2	0	0	0	2	4	4	2	2	3	0	19
Otu803	12	376	0	0	0	0	0	1	7	0	4	4	7	14	37
Otu804	13	400	6	14	18	10	7	6	0	0	0	3	0	3	67
Otu805	14	376	16	1	10	5	4	12	13	5	3	10	14	16	109
Otu806	7	376	0	3	0	1	1	2	0	0	0	0	0	0	7
Otu807	18	381	18	12	9	7	8	0	7	6	1	18	7	0	93
Otu808	9	382	2	2	7	7	6	6	2	1	0	4	2	1	40
Otu809	7	378	0	7	0	0	1	0	1	0	0	0	1	4	14
Otu810	13	380	0	0	0	0	0	0	0	1	13	0	0	8	22
Otu811	7	379	1	1	1	1	0	1	2	6	5	4	6	4	32
Otu812	7	379	5	2	6	6	9	4	3	4	3	5	4	2	53
Otu813	14	379	1	4	7	7	3	6	2	7	3	2	3	6	51
Otu814	15	382	8	4	19	9	10	13	3	18	18	10	5	1	118
Otu815	8	378	7	2	3	4	8	7	2	3	5	6	5	1	53
Otu816	15	376	1	0	1	3	5	1	7	3	3	4	4	0	32
Otu817	7	378	0	1	0	1	0	2	7	2	8	2	3	8	34
Otu818	7	377	2	3	1	1	7	0	0	0	2	2	1	0	19
Otu819	79	380	17	23	13	32	12	1	8	19	12	10	0	30	177
Otu820	18	381	6	4	7	5	4	4	8	7	0	9	8	0	62
Otu821	36	380	10	5	4	7	5	7	3	9	5	9	5	2	71
Otu822	7	380	0	1	0	0	1	0	7	1	0	2	0	0	12
Otu823	16	380	7	3	7	7	5	2	0	2	1	0	0	1	35
Otu824	7	384	3	1	0	3	0	0	4	1	1	1	7	1	22
Otu825	29	380	16	13	7	7	13	4	7	5	4	4	2	0	82
Otu826	7	376	0	1	0	1	0	2	0	2	3	1	0	1	11
Otu827	48	378	6	12	10	8	7	11	7	1	5	3	13	7	90
Otu828	6	378	6	0	6	5	1	8	1	1	1	0	2	2	33
Otu829	6	378	1	5	0	0	0	0	0	1	1	0	6	1	15
Otu830	6	404	2	0	2	2	0	0	0	1	0	0	0	0	7
Otu831	34	380	0	9	0	19	6	15	0	10	8	7	0	0	74
Otu832	8	379	1	1	1	3	3	2	3	2	3	3	7	3	32
Otu833	11	381	8	6	3	9	6	2	0	0	0	0	5	0	39
Otu834	6	378	1	7	2	0	3	1	0	2	0	1	1	0	18
Otu835	12	380	6	12	7	11	3	6	4	4	3	1	3	3	63
Otu836	6	378	6	3	5	8	11	8	0	0	1	1	0	0	43
Otu837	27	379	10	13	2	6	10	11	1	3	1	0	0	0	57
Otu838	10	380	8	5	8	11	8	5	1	2	1	3	0	1	53
Otu839	26	380	2	9	0	5	4	2	7	19	6	7	5	0	66
Otu840	19	381	2	15	6	14	6	8	16	19	11	21	4	9	131
Otu841	23	377	1	0	0	0	0	2	12	15	8	8	12	32	90
Otu842	13	382	12	5	20	13	0	15	2	0	8	4	4	6	89
Otu843	11	380	10	6	9	15	3	1	1	8	2	7	6	0	68
Otu844	14	378	0	0	1	2	6	3	0	0	14	0	0	0	26
Otu845	6	400	4	1	10	3	1	1	0	0	0	0	1	1	22
Otu846	24	380	15	14	30	6	16	26	4	6	6	2	10	2	137
Otu847	24	376	4	2	5	0	6	4	6	4	5	7	30	19	92
Otu848	9	376	0	0	0	0	0	0	1	1	0	3	6	9	20
Otu849	9	381	3	2	2	8	4	8	2	2	5	5	7	2	50
Otu850	14	380	17	14	12	19	17	11	1	4	1	1	8	2	107
Otu851	11	380	3	11	4	4	5	5	4	11	8	5	6	1	67
Otu852	6	391	1	1	0	0	1	0	4	2	2	2	8	0	21
Otu853	33	380	0	8	3	0	2	2	6	2	8	6	2	2	41
Otu854	6	380	0	0	0	0	5	0	0	6	0	1	0	0	12
Otu855	15	380	0	4	0	2	3	2	15	3	7	9	3	7	55
Otu856	6	380	0	0	0	0	0	0	0	1	0	6	0	0	7
Otu857	8	376	0	0	0	0	0	0	1	0	1	0	6	8	16
Otu858	11	380	1	0	1	1	0	0	6	0	13	0	0	0	22
Otu859	6	380	0	0	0	1	1	4	4	8	0	2	6	7	33
Otu860	13	379	2	3	0	4	0	0	2	5	3	9	7	1	36
Otu861	7	380	1	0	1	7	4	1	3	2	4	6	3	5	37
Otu862	10	378	0	2	0	0	0	1	8	1	3	4	1	5	25
Otu863	17	379	1	7	7	3	3	19	5	10	4	4	11	3	77
Otu864	6	380	0	0	0	0	0	0	0	0	0	0	0	6	6
Otu865	22	378	2	17	3	6	12	2	15	4	12	5	9	10	97
Otu866	11	378	2	1	1	3	0	0	9	9	14	6	5	6	56
Otu867	6	382	7	1	1	5	3	6	1	0	2	3	1	1	31
Otu868	10	380	0	0	6	6	4	4	0	0	0	0	2	0	22
Otu869	11	380	18	13	8	16	11	7	3	2	4	7	2	2	93
Otu870	16	380	0	6	15	17	0	0	0	0	0	0	0	3	41
Otu871	6	380	0	2	1	2	2	1	0	1	0	1	0	0	10
Otu872	13	381	1	3	2	5	4	4	3	2	3	6	15	7	55
Otu873	18	380	18	15	9	13	10	10	2	9	0	11	6	1	104
Otu874	6	376	0	0	0	3	0	0	0	6	0	0	0	5	14
Otu875	6	378	6	4	0	4	1	6	0	0	2	0	2	0	25
Otu876	7	380	7	7	8	12	7	3	2	2	4	8	5	1	66
Otu877	11	378	0	2	0	1	0	0	0	0	0	3	6	12	24
Otu878	8	380	1	4	8	2	7	4	2	1	2	6	2	3	42
Otu879	10	398	6	1	6	5	0	0	6	4	4	7	0	2	41
Otu880	18	384	3	7	6	2	2	0	1	2	1	2	4	0	30
Otu881	10	379	3	7	1	0	0	10	1	0	0	0	0	0	22
Otu882	6	376	4	3	1	1	0	0	0	0	1	0	1	1	12
Otu883	87	376	104	0	0	0	0	0	9	0	0	7	2	1	123
Otu884	19	380	9	13	11	12	5	7	9	7	3	11	9	14	110
Otu885	6	381	2	3	1	2	2	3	0	1	1	0	0	0	15
Otu886	6	379	0	0	0	0	0	0	1	6	0	0	1	2	10
Otu887	6	377	1	1	0	1	1	1	4	2	0	1	1	1	14
Otu888	6	381	6	6	4	5	3	5	4	6	7	7	3	1	57
Otu889	17	380	5	12	4	17	8	4	6	4	7	8	5	2	82
Otu890	13	382	8	1	8	7	17	11	4	9	4	20	6	6	101
Otu891	59	380	39	62	26	37	46	20	22	19	7	18	8	12	316
Otu892	6	380	6	6	7	10	0	4	2	1	4	1	0	1	42
Otu893	7	380	7	1	1	4	6	0	0	1	0	2	0	0	22
Otu894	6	379	0	0	0	0	0	0	0	7	1	0	3	3	14
Otu895	6	380	0	1	0	0	2	0	4	2	2	6	1	3	21
Otu896	17	380	14	8	7	7	16	8	14	20	1	7	16	13	131
Otu897	7	381	6	2	4	3	3	6	1	3	0	6	1	1	36
Otu898	11	378	7	5	1	5	1	15	3	8	4	7	8	0	64
Otu899	9	378	4	1	3	5	6	5	0	1	2	4	0	1	32
Otu900	6	380	0	0	0	0	0	0	1	0	0	1	5	9	16
Otu901	6	376	0	0	0	0	0	0	0	5	0	0	0	11	16
Otu902	5	376	1	0	0	0	0	0	1	6	0	6	0	5	19
Otu903	5	382	0	5	5	3	3	2	2	3	1	4	2	0	30
Otu904	5	378	5	9	5	5	3	2	1	7	1	3	0	0	41
Otu905	11	380	0	15	0	2	0	3	10	7	8	6	7	9	67
Otu906	5	380	1	2	7	0	0	4	4	2	1	1	1	1	24
Otu907	14	378	2	4	2	5	4	4	5	1	7	5	4	6	49
Otu908	5	380	1	1	0	2	1	2	5	2	3	3	1	1	22
Otu909	5	379	0	0	1	1	2	5	1	0	0	0	0	0	10
Otu910	39	381	8	3	3	2	2	1	6	57	11	2	44	89	228
Otu911	7	381	2	5	7	0	1	0	0	0	0	0	0	0	15
Otu912	5	380	5	4	5	5	2	3	0	0	0	0	1	0	25
Otu913	5	380	0	0	0	0	0	0	0	0	0	5	1	1	7
Otu914	9	379	0	12	0	0	0	1	12	5	5	0	6	10	51
Otu915	7	382	1	1	0	0	1	1	7	2	2	8	1	5	29
Otu916	21	378	5	6	2	10	5	1	21	5	5	12	5	2	79
Otu917	43	376	5	4	0	2	1	9	66	6	5	13	56	8	175
Otu918	55	376	2	7	3	7	6	11	16	10	5	6	10	10	93
Otu919	5	378	0	0	0	5	0	0	0	1	0	1	0	1	8
Otu920	11	380	3	10	5	12	5	11	2	0	0	3	3	1	55
Otu921	17	376	6	2	0	2	0	9	19	1	0	1	0	0	40
Otu922	5	381	3	3	0	0	1	0	5	4	0	5	1	3	25
Otu923	23	379	6	0	1	0	0	0	6	1	1	6	28	6	55
Otu924	6	380	0	0	0	0	0	1	3	5	7	4	0	0	20
Otu925	28	378	12	3	5	0	21	0	18	21	8	5	0	5	98
Otu926	6	380	2	1	3	0	1	7	6	2	3	3	1	1	30
Otu927	5	383	1	0	1	1	1	0	1	2	5	3	3	1	19
Otu928	7	378	0	0	1	0	2	0	8	0	0	0	5	0	16
Otu929	6	380	0	0	0	0	0	0	5	0	8	6	0	3	22
Otu930	16	380	3	12	6	13	11	21	0	0	1	3	2	0	72
Otu931	15	380	10	0	21	13	12	0	0	0	0	2	0	0	58
Otu932	11	377	0	2	5	1	3	1	0	2	5	4	2	0	25
Otu933	5	368	0	0	0	0	0	0	1	0	0	0	5	0	6
Otu934	8	381	4	2	1	5	1	5	6	6	3	2	4	0	39
Otu935	6	379	5	2	7	7	6	3	4	2	6	5	3	0	50
Otu936	35	379	7	5	0	2	17	18	1	1	1	6	5	13	76
Otu937	38	380	3	7	2	1	3	0	3	22	2	1	9	44	97
Otu938	9	380	1	4	2	2	1	2	12	6	8	4	3	2	47
Otu939	7	380	4	2	1	2	1	6	3	0	5	5	3	2	34
Otu940	36	379	3	1	2	1	0	6	4	1	2	36	6	0	62
Otu941	19	376	0	0	0	3	0	0	4	1	6	3	5	6	28
Otu942	13	379	5	7	5	7	5	10	11	4	8	7	4	11	84
Otu943	59	380	0	22	22	11	13	20	0	13	6	14	0	0	121
Otu944	5	379	5	5	0	5	1	2	0	1	1	1	2	1	24
Otu945	10	380	3	1	3	1	2	2	4	10	3	5	2	6	42
Otu946	9	380	6	5	6	6	7	10	1	1	2	5	0	0	49
Otu947	18	378	7	10	8	10	12	5	5	11	7	4	2	0	81
Otu948	43	378	2	9	3	8	5	3	15	25	12	16	10	4	112
Otu949	5	382	2	4	2	0	5	3	2	5	2	4	1	0	30
Otu950	9	382	6	5	6	4	1	2	4	1	0	7	0	2	38
Otu951	17	382	18	14	17	8	12	8	12	5	14	7	2	4	121
Otu952	5	381	3	0	0	0	1	0	1	1	1	0	1	1	9
Otu953	18	380	20	9	16	26	7	5	5	0	0	5	6	4	103
Otu954	5	379	3	2	1	0	2	1	0	0	0	1	0	3	13
Otu955	5	381	1	0	0	0	1	5	0	0	0	0	0	1	8
Otu956	5	380	5	5	2	2	3	5	1	2	2	0	3	2	32
Otu957	13	379	6	5	3	5	0	0	1	0	2	0	0	0	22
Otu958	47	380	4	0	14	4	1	59	13	9	1	0	0	3	108
Otu959	6	381	6	3	4	2	5	6	5	5	2	1	2	1	42
Otu960	5	381	0	0	0	1	6	0	1	0	0	0	0	0	8
Otu961	7	381	8	3	1	3	6	1	0	3	1	7	6	3	42
Otu962	5	376	5	1	1	4	5	5	0	1	0	0	1	0	23
Otu963	10	376	5	3	1	5	2	0	0	0	0	0	0	0	16
Otu964	5	362	0	0	0	0	0	0	0	0	0	0	1	5	6
Otu965	9	400	5	3	9	4	7	2	0	0	1	0	5	1	37
Otu966	5	377	0	0	0	1	1	7	0	2	0	1	0	0	12
Otu967	6	380	5	2	1	5	2	2	0	0	0	0	1	2	20
Otu968	8	380	7	5	11	15	3	4	0	2	0	3	1	0	51
Otu969	20	376	1	4	3	4	9	5	0	2	0	0	0	3	31
Otu970	9	379	5	2	4	1	1	2	10	0	5	7	5	2	44
Otu971	23	383	10	11	27	15	7	16	6	3	5	12	4	8	124
Otu972	12	400	5	1	10	5	7	2	0	1	1	1	0	1	34
Otu973	13	379	5	14	5	5	8	4	4	5	12	5	10	5	82
Otu974	5	378	0	0	0	0	0	0	0	1	0	0	5	1	7
Otu975	5	379	1	2	1	6	4	2	0	1	1	0	1	2	21
Otu976	13	379	4	4	4	14	10	3	7	15	11	12	18	13	115
Otu977	13	377	7	6	4	6	4	4	4	3	2	5	14	1	60
Otu978	11	380	1	0	0	0	1	0	8	4	1	0	6	11	32
Otu979	13	378	6	5	9	2	5	2	1	20	4	5	7	5	71
Otu980	9	379	4	4	4	2	5	3	0	3	4	2	0	1	32
Otu981	16	380	11	5	4	19	5	8	3	1	2	4	2	5	69
Otu982	5	380	0	0	0	0	0	0	5	0	0	1	0	1	7
Otu983	10	381	4	3	1	4	0	7	3	5	2	8	4	2	43
Otu984	5	380	0	1	2	1	2	0	0	0	0	0	0	1	7
Otu985	4	378	0	0	4	0	0	1	0	1	0	0	0	0	6
Otu986	9	380	0	0	0	0	0	0	9	4	4	0	3	2	22
Otu987	4	380	3	4	1	1	0	1	1	0	0	1	2	1	15
Otu988	4	380	1	4	0	1	4	1	0	0	0	0	1	0	12
Otu989	8	383	3	2	7	8	3	2	0	1	0	1	6	2	35
Otu990	16	380	7	9	0	7	5	11	3	4	4	6	7	0	63
Otu991	4	380	1	0	0	1	2	0	0	2	3	2	3	4	18
Otu992	4	380	0	1	0	1	0	0	3	2	1	4	2	0	14
Otu993	45	380	0	3	4	51	1	2	0	0	0	10	0	0	71
Otu994	6	381	6	1	1	0	0	2	6	7	4	8	4	5	44
Otu995	34	381	3	2	2	0	3	2	11	20	16	15	22	3	99
Otu996	16	377	2	0	0	1	0	1	4	7	2	2	11	23	53
Otu997	9	378	1	3	1	4	2	2	6	6	4	5	3	3	40
Otu998	19	379	0	0	0	0	1	0	10	4	1	2	4	19	41
Otu999	11	381	7	4	5	5	5	4	5	2	3	14	6	4	64
Otu1000	7	376	0	1	0	0	0	0	3	4	1	1	5	7	22
Otu1001	4	378	0	0	4	0	2	0	0	2	0	0	0	1	9
Otu1002	5	381	0	1	0	2	0	1	5	4	3	4	0	1	21
Otu1003	37	381	0	0	0	0	0	0	4	2	1	1	5	38	51
Otu1004	4	380	1	0	0	4	2	0	0	0	0	1	2	0	10
Otu1005	4	381	0	0	0	0	0	5	0	1	3	3	4	1	17
Otu1006	19	380	1	1	20	3	8	8	6	10	4	3	4	4	72
Otu1007	4	378	2	4	3	2	2	1	1	0	0	0	1	1	17
Otu1008	5	377	0	0	4	2	0	1	1	3	2	1	5	3	22
Otu1009	7	380	0	0	0	0	0	0	5	7	6	4	0	1	23
Otu1010	25	382	2	4	3	2	5	3	11	3	2	4	0	14	53
Otu1011	12	376	0	2	2	3	0	9	5	2	0	4	1	2	30
Otu1012	4	382	2	1	1	0	1	7	1	2	1	3	0	0	19
Otu1013	4	380	0	0	0	2	0	0	0	2	4	0	1	1	10
Otu1014	19	381	1	2	4	2	9	0	1	9	5	5	1	20	59
Otu1015	4	381	0	2	0	0	4	0	0	0	0	1	0	0	7
Otu1016	26	378	3	3	3	5	0	0	4	10	26	0	5	0	59
Otu1017	8	379	6	7	2	1	2	5	7	5	6	4	7	3	55
Otu1018	83	380	14	16	19	15	13	17	1	7	8	14	20	0	144
Otu1019	6	380	1	5	6	0	1	1	4	0	1	4	3	1	27
Otu1020	4	376	0	2	1	0	0	4	0	0	0	0	2	0	9
Otu1021	11	382	7	0	4	12	0	1	0	0	0	0	0	2	26
Otu1022	11	380	4	5	3	1	0	3	2	2	0	0	2	4	26
Otu1023	4	402	3	4	2	1	4	3	0	1	1	0	0	0	19
Otu1024	4	376	0	0	0	0	0	0	2	3	4	2	0	1	12
Otu1025	27	382	12	7	8	8	7	6	7	6	5	15	11	4	96
Otu1026	18	379	0	0	0	0	0	0	1	4	2	3	6	20	36
Otu1027	4	380	0	0	0	0	0	0	0	1	0	1	4	0	6
Otu1028	28	380	4	2	5	7	2	3	7	2	4	3	3	0	42
Otu1029	8	380	3	0	4	0	0	0	0	0	3	0	1	9	20
Otu1030	14	376	6	8	2	5	9	12	10	6	7	9	4	1	79
Otu1031	4	380	0	0	0	0	4	1	1	0	1	0	0	0	7
Otu1032	11	381	8	4	7	5	12	4	10	3	8	14	6	2	83
Otu1033	5	380	4	5	6	3	3	3	0	0	0	1	0	0	25
Otu1034	6	380	1	0	0	0	0	0	1	4	0	6	5	0	17
Otu1035	28	383	9	10	14	21	20	15	0	1	1	2	3	2	98
Otu1036	4	380	0	0	0	0	0	0	0	0	0	1	5	2	8
Otu1037	10	380	5	7	2	3	5	4	4	3	0	4	6	3	46
Otu1038	26	378	0	3	6	4	4	6	1	1	0	0	5	2	32
Otu1039	27	381	3	2	0	5	0	0	3	13	0	12	7	27	72
Otu1040	4	378	0	0	0	0	1	0	1	0	4	0	0	0	6
Otu1041	8	378	0	1	2	1	1	4	0	1	0	0	12	0	22
Otu1042	9	376	5	0	1	0	1	1	10	0	0	2	4	0	24
Otu1043	5	376	0	0	0	0	4	1	0	0	3	0	0	1	9
Otu1044	4	380	0	0	0	0	0	0	3	2	4	0	0	1	10
Otu1045	4	379	4	1	1	1	0	1	0	0	0	0	0	0	8
Otu1046	5	378	4	2	1	2	1	0	5	5	2	1	2	5	30
Otu1047	4	380	0	2	0	1	1	1	0	1	5	2	4	0	17
Otu1048	5	381	2	4	5	2	1	2	0	0	0	0	0	0	16
Otu1049	7	378	4	5	7	6	0	0	1	4	1	2	4	0	34
Otu1050	20	382	5	3	0	7	4	10	11	9	20	6	8	5	88
Otu1051	4	376	2	1	0	3	6	6	0	0	0	3	3	0	24
Otu1052	4	380	0	1	1	0	0	1	2	2	1	2	0	4	14
Otu1053	6	381	2	0	2	2	1	1	4	1	6	4	5	1	29
Otu1054	9	381	1	0	1	5	0	1	0	12	4	0	3	1	28
Otu1055	22	379	0	4	4	1	4	4	7	7	3	5	3	2	44
Otu1056	15	379	7	11	13	6	4	8	6	7	5	9	4	5	85
Otu1057	18	379	0	3	5	3	2	2	2	1	1	0	4	0	23
Otu1058	5	378	4	2	0	3	3	5	0	4	0	0	0	1	22
Otu1059	4	379	0	0	0	0	0	0	0	0	0	0	5	0	5
Otu1060	11	380	8	13	4	4	9	5	12	9	2	8	14	4	92
Otu1061	10	383	0	0	0	0	4	0	10	0	1	0	0	1	16
Otu1062	7	377	0	2	1	0	0	0	2	9	5	1	0	0	20
Otu1063	4	378	4	0	3	1	1	0	0	0	1	4	1	1	16
Otu1064	47	380	7	18	15	12	9	14	21	13	3	5	16	0	133
Otu1065	4	380	3	3	5	3	3	5	0	0	0	1	1	0	24
Otu1066	29	380	6	6	11	7	4	0	0	3	0	4	3	1	45
Otu1067	4	380	0	1	0	0	1	1	0	2	1	0	1	4	11
Otu1068	16	380	4	3	9	6	6	5	8	7	9	5	6	7	75
Otu1069	4	380	2	1	1	4	3	0	1	0	0	0	0	0	12
Otu1070	37	379	2	3	2	3	5	4	10	2	8	8	2	2	51
Otu1071	6	380	0	0	0	0	3	1	1	10	1	0	5	1	22
Otu1072	18	376	12	1	6	5	10	9	5	6	4	8	17	0	83
Otu1073	4	382	1	0	0	0	0	4	0	3	0	0	2	0	10
Otu1074	7	380	0	0	0	0	0	0	4	1	2	1	2	7	17
Otu1075	13	380	8	6	7	2	3	0	5	6	0	6	3	0	46
Otu1076	34	380	7	5	3	6	6	2	0	7	0	7	10	1	54
Otu1077	16	376	12	17	8	8	10	9	2	1	2	3	8	4	84
Otu1078	73	381	90	6	49	80	31	37	47	29	111	20	8	10	518
Otu1079	7	379	1	11	12	2	10	8	1	4	0	0	2	0	51
Otu1080	4	380	0	1	4	1	1	1	0	0	0	1	0	0	9
Otu1081	4	380	0	1	5	0	0	2	4	0	2	0	2	1	17
Otu1082	4	380	3	3	4	2	0	0	0	4	0	0	0	1	17
Otu1083	4	380	2	0	1	0	0	1	1	0	0	1	0	1	7
Otu1084	11	378	2	9	2	0	10	7	3	6	0	0	6	0	45
Otu1085	4	376	0	1	0	0	3	4	0	0	0	0	0	0	8
Otu1086	4	380	0	0	4	0	0	1	0	2	0	0	1	1	9
Otu1087	6	383	3	6	2	5	4	4	8	1	2	2	1	0	38
Otu1088	5	382	1	3	2	5	1	3	0	1	1	2	3	2	24
Otu1089	4	382	0	5	0	0	0	0	1	0	2	0	0	0	8
Otu1090	13	378	5	6	3	8	5	8	2	6	6	8	4	4	65
Otu1091	5	376	0	5	0	0	0	0	3	3	0	0	1	0	12
Otu1092	3	366	0	0	3	0	0	2	0	0	0	0	0	0	5
Otu1093	5	380	0	0	0	0	0	3	2	3	0	5	0	0	13
Otu1094	5	378	4	1	3	2	5	4	1	4	2	4	3	0	33
Otu1095	5	386	5	5	3	5	5	1	0	0	0	1	0	0	25
Otu1096	38	381	6	3	4	7	9	1	0	11	12	3	9	0	65
Otu1097	3	370	0	1	4	2	1	0	0	0	0	0	1	0	9
Otu1098	5	378	0	0	0	1	0	0	0	5	2	0	1	5	14
Otu1099	3	378	3	0	0	0	0	1	0	0	0	0	0	0	4
Otu1100	7	381	3	3	2	3	5	1	8	5	6	8	5	1	50
Otu1101	16	378	6	7	6	7	8	5	17	21	23	25	15	5	145
Otu1102	6	378	2	1	1	4	3	5	1	4	2	2	2	3	30
Otu1103	15	380	6	3	2	3	3	5	1	1	3	4	3	0	34
Otu1104	4	379	0	4	4	2	1	2	2	0	0	0	0	0	15
Otu1105	10	380	2	4	4	3	3	1	0	1	2	4	1	0	25
Otu1106	28	379	0	3	1	1	2	4	4	11	6	9	29	25	95
Otu1107	6	380	5	1	2	3	2	0	0	0	2	2	3	0	20
Otu1108	3	378	0	0	0	0	1	0	5	0	1	0	0	0	7
Otu1109	7	384	3	5	7	6	4	1	0	3	0	1	0	1	31
Otu1110	3	379	2	1	1	2	0	0	0	0	1	0	0	0	7
Otu1111	13	378	14	6	15	11	12	15	3	8	5	7	3	2	101
Otu1112	8	379	2	1	0	4	2	4	7	4	2	4	6	3	39
Otu1113	6	379	15	3	5	7	4	10	1	1	0	1	1	0	48
Otu1114	8	376	1	2	2	2	1	1	3	5	0	2	0	0	19
Otu1115	3	380	0	0	1	0	0	0	0	2	0	0	0	1	4
Otu1116	3	380	4	3	0	3	1	3	0	0	0	0	1	2	17
Otu1117	56	380	1	12	23	1	2	22	37	39	0	26	75	50	288
Otu1118	15	374	8	13	6	3	15	11	0	2	5	4	0	6	73
Otu1119	3	380	2	2	2	3	0	0	0	0	0	0	0	0	9
Otu1120	5	376	0	0	0	0	1	0	2	5	0	1	0	3	12
Otu1121	5	380	0	0	0	0	0	0	2	1	3	7	1	5	19
Otu1122	6	379	0	6	4	0	6	3	0	0	0	3	0	0	22
Otu1123	5	384	0	0	0	0	0	0	5	1	4	3	2	0	15
Otu1124	6	380	3	6	2	3	4	3	0	1	0	1	2	2	27
Otu1125	3	380	0	0	3	0	0	1	0	0	0	0	0	0	4
Otu1126	15	378	6	7	1	4	4	11	2	2	2	6	7	4	56
Otu1127	3	378	0	0	0	0	0	0	0	3	0	1	0	3	7
Otu1128	7	378	5	8	4	3	4	9	7	8	11	5	5	0	69
Otu1129	6	380	2	2	1	1	0	0	0	0	4	0	7	5	22
Otu1130	5	384	3	2	6	4	2	2	0	0	0	1	2	0	22
Otu1131	23	378	6	2	1	1	5	3	24	5	20	4	22	36	129
Otu1132	4	380	2	4	4	0	4	2	4	0	3	3	0	0	26
Otu1133	3	376	1	0	0	2	0	1	3	0	0	0	0	0	7
Otu1134	3	383	0	2	1	1	3	2	0	0	1	0	1	0	11
Otu1135	10	380	4	8	6	7	6	10	2	1	5	2	3	1	55
Otu1136	7	380	1	1	1	1	1	1	3	0	1	1	3	1	15
Otu1137	67	378	31	9	11	13	19	14	0	0	3	3	4	4	111
Otu1138	3	378	0	0	0	0	0	1	0	0	0	0	1	3	5
Otu1139	3	382	2	1	0	1	3	2	0	0	0	1	0	0	10
Otu1140	3	385	3	1	2	3	1	3	0	1	0	0	0	0	14
Otu1141	8	382	1	0	0	0	0	0	9	2	3	3	4	1	23
Otu1142	15	380	2	0	0	1	0	1	2	7	3	3	6	0	25
Otu1143	11	381	13	11	7	14	6	7	5	2	2	2	3	10	82
Otu1144	8	376	0	2	3	2	3	1	9	9	3	5	5	9	51
Otu1145	10	380	0	0	0	0	0	0	5	6	1	2	0	12	26
Otu1146	3	380	1	1	0	0	0	0	3	1	0	1	0	0	7
Otu1147	6	377	2	2	1	3	3	1	0	0	0	1	0	0	13
Otu1148	4	380	0	0	0	0	1	0	4	0	2	3	2	4	16
Otu1149	7	380	0	3	0	2	3	5	1	0	1	3	1	0	19
Otu1150	5	379	0	0	0	0	0	0	1	5	3	1	3	0	13
Otu1151	10	380	10	8	6	11	7	3	3	3	0	4	1	1	57
Otu1152	10	377	0	3	11	2	3	0	0	0	3	0	0	1	23
Otu1153	6	380	1	2	2	2	0	1	0	3	3	7	1	0	22
Otu1154	3	379	0	0	0	0	0	1	0	0	1	0	2	0	4
Otu1155	3	382	0	0	0	4	1	2	0	0	0	2	0	0	9
Otu1156	5	380	0	4	1	3	3	3	1	0	1	0	3	0	19
Otu1157	3	382	0	0	0	0	0	0	0	0	3	0	1	0	4
Otu1158	3	382	0	0	0	0	0	0	1	0	3	1	1	1	7
Otu1159	4	382	1	0	0	2	0	3	0	0	2	0	2	0	10
Otu1160	8	378	3	2	7	4	4	1	1	1	0	8	2	0	33
Otu1161	3	380	1	1	1	3	3	0	2	0	0	3	0	0	14
Otu1162	3	381	0	0	0	0	0	0	3	0	0	0	0	0	3
Otu1163	3	376	3	1	3	3	0	0	0	0	0	0	0	0	10
Otu1164	6	380	1	6	2	3	2	1	2	0	0	0	0	0	17
Otu1165	8	382	0	0	0	1	2	0	9	3	4	1	1	1	22
Otu1166	3	382	0	1	0	2	3	0	0	0	0	2	1	0	9
Otu1167	4	381	0	3	4	1	0	0	0	0	0	0	0	0	8
Otu1168	3	379	0	0	0	0	0	1	2	3	0	0	0	2	8
Otu1169	3	376	1	0	0	0	0	0	3	1	2	0	0	0	7
Otu1170	3	381	0	0	0	0	1	3	0	3	0	0	0	3	10
Otu1171	4	380	2	2	1	5	3	4	0	1	1	0	1	1	21
Otu1172	3	380	0	2	3	3	0	0	1	0	0	0	0	1	10
Otu1173	8	377	0	0	1	0	0	0	2	0	1	1	3	8	16
Otu1174	4	380	0	1	0	1	2	0	2	2	3	5	2	0	18
Otu1175	19	380	1	1	1	1	3	9	9	2	10	6	1	0	44
Otu1176	3	379	1	1	2	1	1	0	1	2	1	1	0	0	11
Otu1177	9	381	3	3	3	6	1	7	0	0	0	0	3	0	26
Otu1178	16	380	6	5	8	2	3	3	4	18	12	3	2	0	66
Otu1179	3	379	0	0	0	0	0	0	0	1	0	0	1	3	5
Otu1180	3	380	0	2	3	0	0	0	0	0	0	0	2	0	7
Otu1181	3	380	1	0	0	0	0	0	0	1	3	0	2	0	7
Otu1182	7	380	3	6	0	3	3	3	0	3	3	0	4	0	28
Otu1183	19	383	4	7	9	6	12	4	4	5	5	1	2	0	59
Otu1184	3	382	1	0	0	2	1	1	1	0	0	2	2	0	10
Otu1185	4	382	0	3	0	3	2	1	3	8	10	5	4	2	41
Otu1186	3	380	2	0	0	1	0	2	0	0	0	0	0	0	5
Otu1187	8	380	0	2	3	2	1	0	1	1	0	0	6	3	19
Otu1188	4	378	4	1	0	6	3	1	0	0	1	1	0	1	18
Otu1189	3	378	0	1	1	1	1	0	2	1	3	0	1	0	11
Otu1190	14	380	11	14	2	5	4	7	4	5	1	2	1	0	56
Otu1191	4	380	5	1	3	2	1	1	0	0	0	1	0	0	14
Otu1192	3	380	1	0	3	2	2	1	2	0	0	1	0	0	12
Otu1193	8	380	4	0	0	0	0	0	0	3	8	0	2	0	17
Otu1194	8	378	4	5	2	3	1	4	7	4	4	11	2	9	56
Otu1195	3	382	1	1	2	0	0	0	0	0	0	0	1	0	5
Otu1196	3	380	1	1	1	0	1	1	2	0	3	1	1	3	15
Otu1197	9	378	8	6	7	7	4	3	0	0	0	0	0	1	36
Otu1198	4	380	4	3	2	1	1	0	1	0	0	0	0	1	13
Otu1199	3	378	0	1	3	1	0	1	0	0	1	1	1	0	9
Otu1200	20	380	2	1	2	7	1	0	3	2	0	6	0	1	25
Otu1201	6	399	2	3	0	6	3	0	3	0	4	0	0	0	21
Otu1202	6	380	9	5	4	6	3	0	0	0	0	1	0	0	28
Otu1203	12	380	6	4	4	9	13	8	1	0	4	6	13	11	79
Otu1204	4	382	4	3	2	2	4	2	1	1	0	1	3	0	23
Otu1205	8	380	4	8	5	4	3	0	0	1	1	2	1	1	30
Otu1206	3	376	0	0	4	0	0	0	0	0	0	1	0	0	5
Otu1207	3	379	1	0	0	1	2	3	0	0	2	0	0	0	9
Otu1208	4	380	2	1	0	2	3	3	1	0	1	0	3	0	16
Otu1209	12	383	6	4	2	5	0	4	3	3	5	12	3	5	52
Otu1210	8	378	5	4	6	2	1	3	3	3	1	0	2	1	31
Otu1211	14	382	6	0	0	2	3	7	4	1	1	9	4	1	38
Otu1212	8	378	0	3	0	7	4	6	1	4	7	2	9	0	43
Otu1213	14	379	0	0	0	0	0	0	4	4	3	3	3	5	22
Otu1214	3	375	0	0	0	3	0	0	0	0	0	0	0	0	3
Otu1215	3	379	2	0	0	0	0	0	2	2	4	3	0	0	13
Otu1216	3	379	0	0	2	0	3	0	0	0	0	0	0	0	5
Otu1217	4	380	0	2	1	0	0	0	3	3	4	3	0	3	19
Otu1218	5	380	2	6	0	1	1	0	1	1	3	5	2	0	22
Otu1219	13	380	13	11	12	13	7	8	0	3	0	1	3	0	71
Otu1220	4	380	3	3	0	3	1	3	1	0	0	0	0	0	14
Otu1221	10	380	3	1	0	3	2	0	1	1	3	2	1	2	19
Otu1222	3	375	0	0	0	0	0	0	3	0	0	0	0	0	3
Otu1223	10	381	1	2	2	5	0	3	1	5	5	1	11	1	37
Otu1224	3	377	3	1	2	3	4	2	2	4	4	5	2	0	32
Otu1225	3	382	0	0	4	0	0	0	0	0	0	0	0	0	4
Otu1226	3	378	0	0	0	0	1	0	4	1	0	0	0	0	6
Otu1227	10	381	25	18	13	13	11	20	4	4	2	6	4	3	123
Otu1228	14	378	0	0	0	0	1	0	10	16	14	7	5	3	56
Otu1229	3	380	3	3	1	0	0	3	0	1	0	0	0	0	11
Otu1230	11	379	3	0	2	2	1	3	5	0	3	6	4	0	29
Otu1231	10	380	0	0	0	0	1	1	9	6	3	1	7	11	39
Otu1232	16	380	1	3	6	1	4	0	1	4	0	0	2	0	22
Otu1233	3	382	1	3	2	0	0	0	0	0	0	0	0	0	6
Otu1234	3	372	0	0	0	0	0	0	0	3	0	0	0	0	3
Otu1235	3	380	1	3	1	1	2	1	0	0	1	1	0	0	11
Otu1236	6	378	1	2	3	2	1	1	3	3	0	1	0	0	17
Otu1237	4	380	0	3	2	7	0	1	0	5	0	4	0	0	22
Otu1238	9	376	2	0	1	5	3	5	0	0	0	3	0	0	19
Otu1239	3	376	0	1	2	0	3	3	0	0	0	0	0	3	12
Otu1240	20	379	0	1	1	2	1	0	4	13	6	10	25	3	66
Otu1241	14	378	0	0	2	0	1	1	4	8	0	3	0	2	21
Otu1242	3	379	0	0	0	0	0	0	0	0	0	1	1	3	5
Otu1243	6	378	1	4	3	2	6	2	2	2	1	2	0	1	26
Otu1244	3	380	0	1	1	0	2	0	3	0	0	0	0	0	7
Otu1245	16	378	3	8	11	7	17	12	0	3	0	0	2	0	63
Otu1246	5	381	3	0	8	3	3	1	3	1	1	2	0	1	26
Otu1247	33	376	6	17	9	8	22	17	0	3	7	0	7	2	98
Otu1248	3	380	0	3	1	1	3	3	0	1	1	0	1	0	14
Otu1249	7	380	1	0	1	1	3	0	0	0	0	1	2	3	12
Otu1250	13	378	15	10	10	7	10	13	4	11	2	4	11	1	98
Otu1251	14	379	3	4	2	7	1	3	2	0	0	3	0	0	25
Otu1252	14	376	1	3	1	3	5	0	6	7	14	11	7	3	61
Otu1253	7	380	0	0	1	0	2	0	1	2	3	0	1	8	18
Otu1254	7	380	1	1	1	2	3	0	4	7	5	4	4	6	38
Otu1255	5	381	2	0	0	3	0	5	1	3	4	1	0	2	21
Otu1256	9	381	2	4	7	3	2	2	6	6	2	9	3	6	52
Otu1257	3	380	0	0	1	0	0	0	0	3	2	1	0	1	8
Otu1258	5	380	3	1	1	2	2	0	0	4	0	1	3	0	17
Otu1259	3	378	0	0	0	0	0	0	1	2	1	1	0	0	5
Otu1260	8	378	0	1	8	5	1	0	0	3	1	0	2	2	23
Otu1261	3	379	0	0	0	0	0	0	0	0	3	0	0	1	4
Otu1262	5	380	4	3	0	2	2	1	1	2	3	0	0	0	18
Otu1263	3	380	3	0	0	1	2	0	0	0	0	0	0	0	6
Otu1264	3	382	0	0	0	0	0	1	0	0	0	1	3	0	5
Otu1265	9	381	2	0	1	1	1	2	9	3	8	8	4	9	48
Otu1266	3	381	0	0	0	0	0	0	1	0	3	2	1	0	7
Otu1267	3	381	1	2	3	0	2	0	0	3	1	2	2	0	16
Otu1268	2	376	0	0	0	0	0	0	0	0	0	0	2	0	2
Otu1269	19	378	3	9	4	4	3	3	6	4	3	1	5	1	46
Otu1270	2	378	0	3	0	2	0	0	0	0	0	0	0	0	5
Otu1271	2	382	0	1	0	2	1	2	0	0	0	0	0	0	6
Otu1272	3	381	0	0	0	0	0	0	1	3	0	1	5	5	15
Otu1273	2	384	0	2	0	1	0	0	0	0	0	0	0	0	3
Otu1274	2	376	0	2	0	0	0	0	0	0	0	0	0	2	4
Otu1275	2	380	0	0	0	0	1	2	0	0	1	1	0	0	5
Otu1276	44	380	0	0	0	0	0	0	14	46	0	1	0	0	61
Otu1277	11	379	11	5	4	5	4	8	13	9	6	11	2	14	92
Otu1278	2	382	1	1	0	0	2	0	0	0	1	2	0	1	8
Otu1279	2	396	0	1	2	2	1	1	0	0	0	1	0	0	8
Otu1280	7	380	0	3	0	2	0	0	2	1	0	0	3	7	18
Otu1281	2	378	0	0	0	0	0	0	0	2	0	0	2	1	5
Otu1282	7	380	0	1	1	2	0	2	7	3	1	5	1	2	25
Otu1283	4	382	2	0	1	2	0	1	4	3	0	1	0	0	14
Otu1284	2	380	0	0	2	0	0	0	0	0	1	0	0	0	3
Otu1285	2	376	1	0	0	0	2	0	0	0	0	0	2	2	7
Otu1286	2	379	3	0	0	2	1	3	1	0	0	0	1	1	12
Otu1287	15	382	3	6	4	7	4	5	0	0	0	2	3	1	35
Otu1288	2	376	0	0	1	0	0	1	3	0	1	0	1	1	8
Otu1289	14	381	6	3	6	7	2	9	1	2	2	0	7	3	48
Otu1290	30	380	5	5	4	4	5	6	3	3	0	4	2	0	41
Otu1291	8	383	2	2	6	4	4	4	2	4	8	3	2	1	42
Otu1292	2	380	0	1	1	2	0	1	2	0	0	5	0	0	12
Otu1293	2	380	0	0	1	0	0	1	0	0	0	0	0	0	2
Otu1294	8	382	5	2	2	4	0	5	4	3	9	10	6	0	50
Otu1295	2	380	0	0	0	0	0	2	0	1	0	0	0	0	3
Otu1296	2	385	2	0	0	1	0	0	0	0	0	0	0	0	3
Otu1297	16	379	7	1	2	1	4	5	5	2	0	2	0	16	45
Otu1298	32	379	1	4	0	1	11	2	11	32	32	25	47	21	187
Otu1299	2	378	0	0	0	0	0	0	0	0	0	2	0	0	2
Otu1300	2	380	0	0	0	2	0	0	0	0	0	0	0	0	2
Otu1301	3	379	4	1	0	1	0	3	0	0	0	0	1	2	12
Otu1302	2	379	0	0	0	0	1	0	0	2	0	0	2	2	7
Otu1303	3	383	0	2	1	1	2	0	2	2	1	2	1	0	14
Otu1304	3	376	0	1	0	3	0	0	0	0	0	3	3	0	10
Otu1305	4	380	0	0	1	1	0	1	1	1	3	1	2	1	12
Otu1306	2	371	0	0	0	0	0	2	0	1	0	1	0	0	4
Otu1307	13	382	0	0	0	1	1	1	2	7	5	0	4	8	29
Otu1308	3	378	0	0	0	0	0	3	0	2	0	1	0	0	6
Otu1309	7	380	1	2	2	1	2	1	2	2	2	6	2	2	25
Otu1310	3	380	0	0	1	3	0	1	2	0	0	0	0	0	7
Otu1311	2	379	0	1	2	0	0	0	0	0	1	0	0	0	4
Otu1312	2	382	1	1	0	1	1	0	2	1	0	2	0	2	11
Otu1313	2	376	0	0	0	0	0	0	0	0	1	0	0	2	3
Otu1314	2	380	0	0	3	2	1	0	0	0	0	2	0	0	8
Otu1315	6	379	3	0	0	1	0	6	3	2	0	4	0	0	19
Otu1316	4	378	1	2	1	2	2	1	0	0	0	0	0	0	9
Otu1317	2	380	0	0	0	0	0	3	0	0	0	0	0	0	3
Otu1318	2	380	0	0	0	0	0	0	2	0	0	0	0	0	2
Otu1319	14	382	5	8	10	14	6	4	1	3	2	0	2	0	55
Otu1320	2	364	0	0	0	0	0	2	0	0	0	0	0	0	2
Otu1321	2	378	1	1	0	1	0	0	0	1	0	0	2	0	6
Otu1322	2	379	1	0	0	5	0	1	0	1	0	2	0	0	10
Otu1323	3	378	0	0	0	0	1	0	0	3	2	1	0	0	7
Otu1324	5	380	2	1	2	1	1	2	1	5	1	3	1	0	20
Otu1325	10	382	0	2	4	5	3	5	0	2	1	0	0	0	22
Otu1326	2	380	0	0	0	0	0	1	0	0	0	0	0	3	4
Otu1327	34	383	2	3	7	6	11	5	0	0	0	0	0	2	36
Otu1328	5	380	0	0	2	5	0	0	0	0	0	0	0	0	7
Otu1329	2	380	1	0	0	2	0	1	0	0	0	0	0	0	4
Otu1330	2	383	0	0	0	0	0	2	0	0	0	0	0	0	2
Otu1331	28	379	3	6	4	9	5	5	7	8	8	7	2	1	65
Otu1332	12	380	4	1	2	1	2	2	3	12	6	3	0	0	36
Otu1333	2	380	0	0	0	0	0	0	2	0	0	0	0	0	2
Otu1334	6	380	0	6	0	2	7	7	1	0	4	0	2	0	29
Otu1335	13	382	11	7	4	6	2	4	0	0	5	7	1	2	49
Otu1336	7	380	1	1	3	1	0	1	3	8	1	0	0	2	21
Otu1337	4	380	2	2	1	0	5	2	4	3	3	6	2	1	31
Otu1338	11	380	7	11	6	4	5	0	0	0	7	0	1	0	41
Otu1339	8	378	0	10	0	0	0	0	4	0	0	0	2	3	19
Otu1340	2	380	0	0	0	0	0	0	0	0	2	0	0	0	2
Otu1341	7	379	1	0	1	0	1	0	3	2	3	2	5	8	26
Otu1342	3	378	2	1	3	0	1	0	0	1	1	0	1	0	10
Otu1343	22	379	2	3	1	2	2	2	17	3	0	5	10	22	69
Otu1344	44	380	17	21	30	34	21	12	11	4	2	8	4	4	168
Otu1345	3	376	0	1	1	0	0	0	0	2	0	1	3	1	9
Otu1346	20	381	15	3	6	12	3	6	2	0	0	4	0	0	51
Otu1347	2	377	0	0	2	0	0	0	0	0	0	0	0	0	2
Otu1348	2	383	1	3	0	0	0	0	0	1	0	0	0	0	5
Otu1349	2	383	0	1	1	0	1	0	0	0	0	1	0	0	4
Otu1350	2	378	0	1	0	0	0	0	0	0	1	1	2	0	5
Otu1351	11	376	1	4	3	1	0	2	7	0	3	6	7	1	35
Otu1352	2	380	0	0	0	0	2	0	0	0	0	0	0	0	2
Otu1353	9	381	0	0	0	0	0	0	4	0	0	2	2	9	17
Otu1354	13	381	1	1	3	2	1	3	5	1	1	2	1	1	22
Otu1355	2	376	0	0	0	0	1	0	0	2	0	1	0	0	4
Otu1356	4	383	0	1	0	2	1	0	1	4	0	3	0	1	13
Otu1357	24	381	2	2	4	0	6	0	17	6	6	6	7	19	75
Otu1358	2	380	0	0	0	2	0	2	0	0	0	0	1	2	7
Otu1359	2	379	1	0	1	0	0	0	2	1	0	0	0	0	5
Otu1360	8	377	11	1	0	0	1	2	4	2	1	3	6	4	35
Otu1361	8	380	3	3	4	1	5	0	1	1	1	1	1	1	22
Otu1362	10	383	0	0	0	1	0	0	4	9	3	6	2	12	37
Otu1363	4	380	1	0	1	5	0	0	0	1	0	2	0	2	12
Otu1364	47	379	19	42	22	26	25	21	1	2	1	1	3	2	165
Otu1365	3	384	0	0	1	2	1	0	0	2	0	0	0	1	7
Otu1366	5	380	2	0	1	0	1	0	0	0	0	0	0	5	9
Otu1367	5	381	2	1	1	1	1	1	3	0	2	2	1	7	22
Otu1368	6	378	2	1	2	0	2	1	1	4	2	1	0	0	16
Otu1369	2	380	0	2	0	0	0	1	0	0	1	0	0	0	4
Otu1370	5	379	1	1	4	2	4	1	2	2	1	1	5	0	24
Otu1371	15	381	8	6	4	7	9	4	5	1	2	4	10	5	65
Otu1372	3	378	0	0	0	0	0	3	0	3	1	0	2	2	11
Otu1373	2	411	0	1	0	2	0	0	1	0	3	0	0	1	8
Otu1374	15	376	11	16	0	1	12	15	0	3	8	14	14	0	94
Otu1375	2	384	0	0	0	0	1	2	0	1	0	0	0	0	4
Otu1376	4	378	0	0	1	3	2	0	0	1	2	0	0	0	9
Otu1377	2	379	1	0	0	0	0	0	0	0	1	0	0	0	2
Otu1378	2	380	1	1	0	2	0	0	0	0	0	0	1	0	5
Otu1379	5	383	1	3	1	5	3	2	1	1	1	5	2	0	25
Otu1380	12	378	1	1	0	0	1	1	2	1	4	2	2	13	28
Otu1381	5	380	1	2	3	2	2	1	0	1	0	0	1	0	13
Otu1382	7	382	0	2	2	2	1	2	1	0	0	2	0	0	12
Otu1383	2	379	0	2	0	0	0	0	0	0	0	0	0	0	2
Otu1384	2	380	0	0	1	2	0	0	0	1	0	2	0	0	6
Otu1385	2	370	0	0	0	0	0	2	0	0	0	0	0	0	2
Otu1386	13	378	9	4	0	2	2	2	1	0	0	0	0	0	20
Otu1387	2	379	0	0	3	0	1	1	0	0	0	0	0	0	5
Otu1388	5	380	4	1	1	7	1	2	1	4	6	4	0	1	32
Otu1389	2	380	0	0	0	0	0	0	0	0	0	0	0	2	2
Otu1390	2	378	2	2	1	0	1	0	2	0	1	0	2	0	11
Otu1391	2	378	0	1	0	1	2	0	0	0	0	0	0	0	4
Otu1392	27	382	1	1	1	0	2	0	9	11	20	3	27	1	76
Otu1393	2	381	0	2	2	1	0	1	2	2	1	0	0	1	12
Otu1394	7	380	1	0	1	2	1	0	4	7	5	13	2	3	39
Otu1395	2	378	0	0	0	0	0	0	0	0	2	0	0	0	2
Otu1396	2	380	0	0	2	0	0	0	1	2	0	0	2	1	8
Otu1397	8	380	2	0	7	8	0	0	0	0	0	0	0	0	17
Otu1398	2	398	2	1	3	1	2	2	0	0	1	2	3	0	17
Otu1399	3	380	0	2	0	1	3	0	0	1	3	0	2	0	12
Otu1400	10	380	3	4	3	2	4	3	0	0	0	0	1	0	20
Otu1401	2	380	2	0	1	1	2	0	0	0	0	0	0	0	6
Otu1402	6	380	2	8	0	0	0	4	0	3	0	0	2	1	20
Otu1403	4	380	1	2	0	1	3	0	2	4	1	0	4	0	18
Otu1404	11	380	6	12	6	2	2	2	2	1	2	1	1	1	38
Otu1405	16	379	3	4	2	5	1	2	8	20	10	11	24	17	107
Otu1406	2	380	0	0	1	2	0	0	1	0	0	0	0	0	4
Otu1407	5	376	4	1	0	1	2	0	1	1	4	3	0	0	17
Otu1408	4	380	1	0	1	1	2	1	0	1	1	3	1	2	14
Otu1409	11	378	1	0	0	11	2	0	5	12	1	1	9	0	42
Otu1410	2	383	0	0	0	0	2	0	0	0	0	0	0	0	2
Otu1411	5	380	1	2	2	5	3	0	0	1	0	0	1	1	16
Otu1412	7	380	8	6	3	2	5	3	1	1	2	2	0	0	33
Otu1413	9	380	2	1	0	4	0	4	6	7	5	4	10	13	56
Otu1414	2	379	0	0	0	0	0	0	0	2	0	0	0	0	2
Otu1415	8	380	7	5	3	13	11	6	9	7	10	20	8	4	103
Otu1416	2	379	0	1	0	0	2	1	0	0	0	0	0	0	4
Otu1417	5	380	5	0	0	0	0	0	0	5	2	1	2	6	21
Otu1418	10	380	5	2	3	1	4	0	0	1	0	1	0	0	17
Otu1419	2	380	0	0	0	0	0	0	0	2	1	0	1	1	5
Otu1420	2	370	0	0	0	0	0	0	0	2	0	0	0	0	2
Otu1421	5	379	0	1	0	0	0	0	1	3	0	0	2	4	11
Otu1422	2	378	0	0	0	0	2	0	0	0	0	1	0	0	3
Otu1423	7	383	0	4	2	0	2	5	1	2	1	2	0	0	19
Otu1424	3	380	2	2	1	2	2	5	1	0	0	0	0	1	16
Otu1425	12	379	3	2	2	5	2	4	5	8	3	6	4	0	44
Otu1426	2	380	1	2	0	0	0	2	0	1	1	1	1	2	11
Otu1427	3	381	2	0	1	0	1	3	0	0	0	0	0	0	7
Otu1428	2	380	0	1	1	0	0	0	1	1	4	0	1	2	11
Otu1429	4	378	0	1	4	0	0	1	0	0	0	0	0	3	9
Otu1430	7	380	1	3	0	1	1	1	3	3	0	7	2	1	23
Otu1431	2	379	1	0	2	0	0	0	0	0	0	0	0	0	3
Otu1432	6	383	0	1	0	1	0	0	2	7	0	2	6	5	24
Otu1433	3	380	0	0	0	0	0	1	3	2	2	4	3	0	15
Otu1434	8	376	0	0	0	0	0	0	0	0	0	0	3	8	11
Otu1435	2	380	0	0	0	0	2	0	0	2	0	0	2	4	10
Otu1436	2	380	1	1	0	0	0	0	0	0	0	0	0	0	2
Otu1437	3	380	0	0	0	0	0	0	2	4	2	0	0	0	8
Otu1438	9	382	0	0	0	0	0	0	0	10	1	2	0	1	14
Otu1439	88	376	2	0	27	15	2	35	6	0	0	12	1	4	104
Otu1440	6	380	0	1	2	0	0	1	2	3	2	2	2	3	18
Otu1441	7	380	0	1	0	0	0	0	2	2	2	2	3	1	13
Otu1442	117	379	0	23	1	4	2	4	12	67	16	11	17	125	282
Otu1443	3	380	0	3	0	2	1	0	0	0	1	0	2	4	13
Otu1444	7	380	5	1	7	4	6	3	1	0	1	2	1	0	31
Otu1445	5	379	3	6	4	3	5	5	2	0	0	1	2	1	32
Otu1446	2	378	2	0	0	0	0	0	0	0	0	0	0	1	3
Otu1447	2	379	0	1	0	2	1	0	1	2	0	1	0	0	8
Otu1448	9	380	7	7	12	1	7	3	3	1	2	5	9	0	57
Otu1449	4	380	1	2	2	4	0	0	0	0	2	0	1	0	12
Otu1450	3	379	0	0	3	0	2	1	0	0	0	0	0	0	6
Otu1451	2	379	2	1	0	1	0	0	0	0	3	2	3	0	12
Otu1452	12	380	5	1	4	4	2	7	0	3	2	3	5	1	37
Otu1453	16	376	0	0	0	0	0	0	0	16	0	0	3	9	28
Otu1454	2	382	2	2	2	0	1	2	0	0	0	0	1	0	10
Otu1455	10	379	1	0	0	1	0	0	0	0	10	2	0	0	14
Otu1456	2	379	0	0	0	0	0	1	2	0	0	0	0	0	3
Otu1457	2	364	0	0	0	0	0	0	0	2	0	0	0	0	2
Otu1458	2	379	0	0	0	0	0	0	0	2	0	0	3	1	6
Otu1459	8	380	2	1	1	1	1	1	1	0	0	0	2	2	12
Otu1460	9	380	3	3	4	2	3	8	9	2	2	3	2	0	41
Otu1461	4	376	0	1	0	1	0	0	1	0	0	0	5	1	9
Otu1462	2	383	0	1	0	0	2	0	0	0	0	0	0	0	3
Otu1463	2	381	0	0	0	0	0	0	0	0	0	2	0	0	2
Otu1464	2	380	0	0	2	0	3	0	0	0	0	1	0	0	6
Otu1465	32	376	0	0	0	0	0	0	0	0	2	0	32	8	42
Otu1466	3	380	0	0	1	0	0	0	3	3	2	1	0	2	12
Otu1467	2	378	0	0	2	0	0	0	0	0	0	0	0	1	3
Otu1468	5	378	0	2	5	0	5	2	0	4	0	2	4	2	26
Otu1469	16	378	9	4	1	3	4	20	1	2	0	1	1	1	47
Otu1470	5	380	0	2	3	1	0	5	0	1	6	1	1	2	22
Otu1471	14	379	0	4	6	0	1	0	2	1	1	2	8	4	29
Otu1472	2	378	1	0	0	1	1	2	0	0	0	0	0	0	5
Otu1473	3	380	3	0	0	0	4	4	2	1	2	1	2	0	19
Otu1474	4	381	4	1	1	5	2	5	3	2	3	2	0	1	29
Otu1475	18	378	5	11	2	6	8	4	9	18	11	6	5	0	85
Otu1476	3	379	1	2	0	5	1	0	1	1	0	1	1	0	13
Otu1477	4	378	0	2	1	0	4	1	0	0	0	2	0	0	10
Otu1478	6	380	2	0	0	0	1	0	0	0	0	4	1	0	8
Otu1479	2	380	0	1	0	0	0	0	2	0	0	2	0	1	6
Otu1480	2	376	0	0	1	0	0	2	0	0	0	0	0	0	3
Otu1481	31	379	2	5	12	16	7	11	2	1	0	1	3	1	61
Otu1482	12	380	0	0	0	0	0	5	13	10	4	0	9	4	45
Otu1483	16	380	4	6	0	3	1	8	12	14	10	5	6	0	69
Otu1484	2	376	2	1	0	0	0	0	0	0	0	0	0	0	3
Otu1485	6	377	0	0	0	0	0	1	2	0	1	1	3	2	10
Otu1486	2	365	0	0	0	2	0	1	0	0	0	0	0	0	3
Otu1487	2	380	0	0	0	0	0	1	0	0	2	0	0	0	3
Otu1488	2	380	0	0	0	0	0	0	1	1	1	0	2	1	6
Otu1489	2	380	0	0	0	0	0	0	0	2	0	0	2	2	6
Otu1490	15	381	2	1	2	4	0	2	3	7	3	8	0	2	34
Otu1491	7	378	0	0	0	0	0	0	0	3	2	3	5	7	20
Otu1492	2	380	1	0	0	2	1	0	0	0	0	0	0	0	4
Otu1493	8	380	0	0	2	0	1	0	1	1	8	3	0	0	16
Otu1494	17	378	1	0	0	0	5	3	7	8	2	2	18	3	49
Otu1495	2	378	0	1	0	0	0	0	0	2	0	0	1	1	5
Otu1496	45	381	2	2	1	1	2	0	8	16	0	1	10	17	60
Otu1497	7	379	3	2	3	4	5	2	2	3	1	3	0	0	28
Otu1498	6	379	0	0	0	0	0	0	1	0	0	2	2	4	9
Otu1499	7	396	1	2	2	2	0	1	4	4	9	2	7	1	35
Otu1502	1	376	0	0	0	0	2	0	0	0	0	0	0	1	3
Otu1503	1	382	1	0	0	0	1	1	0	1	0	1	1	0	6
Otu1504	2	381	0	0	1	0	1	1	0	0	1	0	1	0	5
Otu1505	1	380	0	0	0	0	1	0	0	1	0	0	0	0	2
Otu1506	2	380	0	0	1	0	0	1	0	0	1	0	1	0	4
Otu1507	9	382	0	0	9	8	0	1	0	0	0	0	0	0	18
Otu1510	8	380	0	1	1	1	3	2	8	2	1	4	6	5	34
Otu1511	4	383	0	2	0	0	2	0	2	1	0	0	0	0	7
Otu1514	6	380	4	7	6	5	4	2	1	0	2	5	1	0	37
Otu1516	2	379	0	0	0	0	0	0	1	0	0	0	1	1	3
Otu1517	1	378	1	0	0	1	0	0	0	0	0	0	0	0	2
Otu1518	1	379	1	0	0	0	0	0	0	0	0	0	0	1	2
Otu1519	2	380	2	0	1	0	1	0	0	0	0	0	1	0	5
Otu1522	4	381	0	0	0	0	0	1	3	1	1	1	0	0	7
Otu1524	1	380	1	0	0	1	0	1	0	0	0	0	0	0	3
Otu1526	3	380	1	2	0	0	2	0	3	1	2	0	4	0	15
Otu1529	4	381	0	3	2	0	0	1	4	0	0	0	1	0	11
Otu1531	11	380	3	5	11	1	2	5	0	0	0	1	1	1	30
Otu1533	3	381	1	0	2	1	0	1	1	3	0	1	0	0	10
Otu1534	3	379	4	1	2	3	0	3	0	1	2	0	3	1	20
Otu1535	4	380	0	0	0	0	0	0	0	0	0	0	1	4	5
Otu1536	15	377	0	1	3	3	0	15	0	5	0	2	1	0	30
Otu1537	11	380	1	6	9	4	6	5	7	3	3	4	3	2	53
Otu1541	6	382	0	0	0	0	0	1	2	2	4	1	2	6	18
Otu1542	36	380	8	15	4	4	0	0	0	16	7	2	5	1	62
Otu1543	11	380	0	0	2	4	4	12	0	0	0	0	0	0	22
Otu1546	4	380	2	0	4	1	3	1	0	2	1	4	3	0	21
Otu1547	1	380	0	1	0	1	0	0	0	0	0	0	0	0	2
Otu1548	1	380	0	0	0	0	0	1	0	1	0	1	0	0	3
Otu1552	11	381	0	9	1	1	4	1	0	2	0	0	1	2	21
Otu1555	1	363	0	0	0	0	1	0	0	0	0	0	1	0	2
Otu1556	5	380	2	0	3	2	5	0	2	2	1	1	0	1	19
Otu1558	1	379	0	0	0	0	0	0	0	1	0	1	0	0	2
Otu1559	19	378	39	4	1	0	1	0	5	1	1	2	3	0	57
Otu1560	1	377	0	0	0	2	0	0	1	1	0	1	1	1	7
Otu1561	17	378	5	2	0	8	2	1	0	2	7	0	4	24	55
Otu1565	1	383	0	1	1	0	0	0	0	0	0	0	0	0	2
Otu1566	23	379	0	0	0	0	2	0	2	6	0	13	4	3	30
Otu1568	3	380	0	0	3	0	0	2	0	0	0	0	2	0	7
Otu1569	9	382	2	3	9	4	5	5	2	0	1	4	1	1	37
Otu1570	2	376	0	0	0	0	0	0	0	1	0	0	2	0	3
Otu1571	13	380	14	6	0	7	10	4	0	1	1	2	2	1	48
Otu1574	1	381	0	1	0	0	0	1	0	0	0	0	1	0	3
Otu1575	3	378	2	1	1	1	0	0	0	0	1	0	0	0	6
Otu1576	5	380	3	3	1	3	1	3	2	0	1	2	2	1	22
Otu1577	4	380	2	1	1	4	1	1	0	2	0	1	0	1	14
Otu1578	7	379	1	0	0	0	1	0	0	7	1	1	0	0	11
Otu1584	1	380	0	0	0	1	0	0	0	0	0	0	1	0	2
Otu1585	1	380	0	0	0	1	0	0	0	0	0	0	1	0	2
Otu1586	13	378	14	9	12	16	10	12	2	7	4	11	3	5	105
Otu1587	7	380	0	0	0	0	0	0	4	3	1	1	3	3	15
Otu1588	2	380	0	0	0	1	2	1	1	0	0	1	0	0	6
Otu1589	1	376	0	0	1	0	0	0	0	0	0	0	1	0	2
Otu1590	3	380	0	0	0	0	0	0	1	0	0	0	5	1	7
Otu1591	1	378	0	0	0	0	1	0	0	0	0	0	1	0	2
Otu1592	3	380	0	2	1	1	0	2	0	3	3	4	1	0	17
Otu1593	2	382	1	0	2	0	2	2	0	2	0	1	1	0	11
Otu1594	3	380	0	0	3	0	0	0	0	0	0	1	0	0	4
Otu1595	1	378	0	0	0	0	0	0	0	1	0	0	1	0	2
Otu1607	5	381	3	7	2	5	2	1	0	0	0	2	0	0	22
Otu1608	1	378	0	1	0	1	0	0	0	0	0	0	0	0	2
Otu1611	7	379	0	0	0	0	0	0	3	7	1	1	1	0	13
Otu1612	1	375	0	1	0	1	1	0	0	0	0	0	0	0	3
Otu1614	5	381	0	0	2	3	2	2	0	0	0	1	4	0	14
Otu1615	1	379	0	0	0	0	2	0	1	0	0	0	0	0	3
Otu1616	1	360	1	0	0	0	0	0	0	0	0	1	0	0	2
Otu1617	6	380	0	0	1	0	0	6	0	0	0	0	0	0	7
Otu1620	3	381	0	0	0	0	0	0	3	1	0	0	0	1	5
Otu1622	11	378	0	3	2	0	0	3	2	6	4	0	2	5	27
Otu1623	1	378	0	0	1	0	0	1	0	1	0	1	0	1	5
Otu1624	1	381	0	0	0	0	0	0	1	0	0	1	0	0	2
Otu1625	1	377	1	1	0	1	1	0	0	1	0	0	1	1	7
Otu1627	1	378	0	0	1	0	0	1	0	0	0	0	0	0	2
Otu1629	2	380	1	2	2	1	0	1	0	0	2	0	0	0	9
Otu1630	7	378	6	0	0	0	0	0	0	1	3	2	2	1	15
Otu1631	1	378	0	0	0	0	1	0	0	0	0	1	0	0	2
Otu1632	4	380	0	0	0	0	0	0	5	0	2	0	0	0	7
Otu1634	3	380	0	0	0	0	0	0	1	3	0	1	3	0	8
Otu1637	3	376	1	4	0	0	3	1	0	0	0	0	2	0	11
Otu1638	27	381	12	6	22	45	8	20	0	20	6	23	12	10	184
Otu1640	3	371	0	0	0	0	1	0	0	3	0	0	0	0	4
Otu1641	1	376	0	0	0	0	0	1	0	1	0	0	0	0	2
Otu1644	35	380	1	1	10	5	50	1	1	1	2	11	0	1	84
Otu1646	14	382	0	5	0	0	1	2	3	1	4	1	7	19	43
Otu1647	1	379	0	0	0	1	0	1	0	0	0	1	1	0	4
Otu1649	20	380	7	11	6	0	7	0	0	4	8	0	4	4	51
Otu1650	1	377	0	1	0	0	0	0	0	0	0	1	0	1	3
Otu1652	8	376	0	0	0	0	2	0	0	1	0	0	1	9	13
Otu1654	11	381	1	2	1	1	3	1	2	1	0	2	1	1	16
Otu1655	3	378	0	0	0	0	0	0	1	0	0	0	3	2	6
Otu1656	3	379	0	0	1	3	1	0	0	0	0	0	0	0	5
Otu1657	1	369	1	0	1	0	0	0	0	0	0	0	0	0	2
Otu1659	65	380	0	7	0	1	66	0	0	1	12	0	1	1	89
Otu1661	4	379	0	2	0	0	1	1	1	1	1	0	4	1	12
Otu1662	3	381	3	0	0	0	0	0	1	0	0	1	0	0	5
Otu1668	4	380	1	1	4	2	1	1	3	0	0	1	0	1	15
Otu1671	2	380	0	0	0	0	0	0	2	1	0	0	1	0	4
Otu1675	1	380	0	0	0	1	0	0	0	0	0	0	0	1	2
Otu1676	15	379	0	0	0	0	0	0	0	15	6	1	0	9	31
Otu1677	6	376	0	0	0	0	6	1	0	0	0	0	1	0	8
Otu1680	1	380	0	0	0	1	0	0	1	0	0	0	0	0	2
Otu1681	3	383	1	2	3	3	0	0	1	0	1	0	0	0	11
Otu1683	1	380	0	0	0	0	0	0	0	0	1	0	0	1	2
Otu1684	1	380	0	0	0	1	1	0	0	0	0	0	1	1	4
Otu1685	2	380	0	0	1	1	1	0	1	0	0	0	2	0	6
Otu1687	1	380	0	0	0	0	0	2	0	0	0	0	1	1	4
Otu1692	3	383	0	0	3	2	4	0	0	1	0	0	0	0	10
Otu1697	2	380	0	0	1	0	1	2	0	0	0	0	0	0	4
Otu1700	29	380	2	2	1	1	0	11	6	5	3	7	1	0	39
Otu1701	1	380	0	0	1	0	1	0	0	0	0	1	0	0	3
Otu1704	1	358	1	0	0	0	0	0	0	0	1	0	0	0	2
Otu1705	3	381	0	0	0	3	3	0	0	0	0	0	0	0	6
Otu1706	7	380	3	0	1	2	4	0	1	0	0	1	1	0	13
Otu1707	3	381	1	3	0	0	0	0	0	0	0	0	0	0	4
Otu1712	4	379	0	0	0	1	0	0	0	0	0	0	4	0	5
Otu1714	1	380	0	0	0	0	0	0	0	0	0	0	1	1	2
Otu1715	6	377	0	0	0	0	0	0	0	0	1	0	6	0	7
Otu1716	1	380	1	1	1	1	0	0	0	0	0	0	0	0	4
Otu1718	1	380	1	0	0	0	1	0	0	0	0	0	0	0	2
Otu1720	1	380	1	0	0	0	0	0	0	0	1	1	0	0	3
Otu1722	5	379	0	0	0	0	0	0	0	6	2	0	1	0	9
Otu1723	2	380	2	1	0	0	0	0	0	0	0	0	0	0	3
Otu1725	1	386	0	0	0	0	0	0	1	0	1	0	0	0	2
Otu1728	2	380	1	3	0	1	0	1	0	0	1	0	0	0	7
Otu1730	2	377	1	0	1	1	0	1	1	2	0	1	0	0	8
Otu1732	14	378	6	6	0	2	2	3	4	0	1	1	12	4	41
Otu1738	2	378	1	0	1	1	1	2	0	0	0	0	1	1	8
Otu1740	1	380	0	1	0	0	0	1	0	0	0	0	0	0	2
Otu1741	1	380	0	0	0	1	0	0	0	1	0	0	0	0	2
Otu1742	1	381	0	0	0	0	0	0	1	0	1	1	0	0	3
Otu1747	2	380	0	3	0	0	0	0	0	1	0	1	1	1	7
Otu1749	1	380	0	0	0	0	0	1	1	2	1	1	0	0	6
Otu1752	6	379	2	4	0	0	1	0	1	1	0	0	1	1	11
Otu1754	3	381	0	2	3	0	1	1	0	0	0	1	1	1	10
Otu1756	2	380	0	2	0	1	0	2	0	0	0	0	0	0	5
Otu1757	14	400	0	0	0	12	1	0	0	0	2	0	1	0	16
Otu1764	3	381	0	0	0	3	1	0	0	0	0	1	0	0	5
Otu1765	3	381	3	0	0	0	0	0	1	0	0	0	0	0	4
Otu1770	3	379	0	5	2	1	2	1	0	0	0	0	1	0	12
Otu1771	2	380	0	1	3	1	1	0	1	0	0	0	0	0	7
Otu1772	4	380	0	0	0	2	0	1	1	2	0	1	1	4	12
Otu1775	5	380	0	2	1	2	3	0	0	3	0	0	3	7	21
Otu1777	1	379	0	0	0	1	0	0	0	0	1	1	0	1	4
Otu1778	32	380	2	2	5	11	7	2	0	0	1	10	7	0	47
Otu1779	4	380	0	0	1	0	1	0	0	4	0	0	0	0	6
Otu1781	1	381	0	0	1	0	0	0	1	0	2	0	1	0	5
Otu1785	1	378	1	0	0	0	0	0	1	0	0	1	0	0	3
Otu1786	2	379	0	0	1	0	0	1	1	0	2	0	0	0	5
Otu1791	2	380	0	2	0	0	2	2	0	0	0	0	1	0	7
Otu1792	2	381	0	0	0	0	0	1	2	0	1	0	1	4	9
Otu1793	1	380	2	1	1	1	0	0	0	0	1	0	0	0	6
Otu1795	1	380	0	1	0	1	0	0	0	0	0	0	0	0	2
Otu1796	3	380	0	2	1	0	1	1	0	1	1	1	2	0	10
Otu1797	8	379	1	0	0	0	0	1	2	1	3	0	4	3	15
Otu1799	7	380	3	3	5	5	3	0	3	1	2	3	1	0	29
Otu1800	1	376	0	0	0	0	0	0	0	1	0	1	0	0	2
Otu1801	13	380	0	7	0	12	13	13	4	5	4	0	1	0	59
Otu1804	1	380	1	0	1	0	0	0	0	0	0	0	0	0	2
Otu1805	1	401	0	0	0	0	0	0	0	1	1	0	0	0	2
Otu1806	4	380	2	0	0	0	0	1	0	0	1	1	1	1	7
Otu1807	2	378	0	1	0	0	0	0	1	2	1	2	0	0	7
Otu1808	7	380	8	0	0	0	0	0	0	0	0	0	0	0	8
Otu1810	1	380	0	1	0	0	0	1	0	1	0	1	0	1	5
Otu1811	9	380	2	0	1	0	0	9	0	0	0	0	0	0	12
Otu1812	4	381	3	1	1	2	2	0	0	0	0	0	0	0	9
Otu1813	1	348	0	0	0	0	0	0	0	0	1	1	0	0	2
Otu1814	1	380	0	0	1	0	1	0	0	0	0	0	0	0	2
Otu1817	1	380	0	1	0	0	0	1	0	0	0	0	0	0	2
Otu1818	8	379	1	5	2	0	0	0	2	0	0	0	9	0	19
Otu1819	2	382	0	0	0	0	0	0	1	0	2	0	0	0	3
Otu1820	3	379	0	3	1	0	0	0	1	0	0	0	0	0	5
Otu1821	1	380	0	0	0	0	0	0	1	0	0	1	0	0	2
Otu1822	2	380	2	0	0	3	0	1	0	0	0	0	0	0	6
Otu1824	2	380	1	0	0	0	0	2	2	2	1	1	0	0	9
Otu1825	2	376	1	2	0	1	0	2	0	0	0	1	0	0	7
Otu1826	4	380	0	1	1	1	0	0	4	0	2	1	0	0	10
Otu1829	5	382	0	0	0	0	0	0	3	1	2	3	2	5	16
Otu1830	12	380	3	2	1	4	0	1	1	3	0	0	0	0	15
Otu1833	1	378	0	0	1	0	0	0	0	0	1	0	0	0	2
Otu1834	3	378	1	2	0	3	0	0	0	0	0	0	0	0	6
Otu1835	2	378	1	2	0	0	0	0	0	1	1	0	0	1	6
Otu1838	17	380	6	3	0	0	4	0	3	0	0	5	1	0	22
Otu1842	18	380	1	0	0	7	3	8	1	2	2	6	0	0	30
Otu1843	4	379	0	2	2	4	4	1	2	0	0	1	1	0	17
Otu1845	8	382	0	1	2	1	2	3	1	0	2	3	3	1	19
Otu1847	4	382	1	0	1	1	1	1	1	2	1	5	1	2	17
Otu1850	1	365	0	0	1	0	0	1	0	0	0	0	0	0	2
Otu1852	5	378	0	0	5	1	1	3	3	1	3	1	5	1	24
Otu1853	2	375	0	0	0	0	0	0	1	1	1	0	0	0	3
Otu1854	5	383	0	2	4	2	5	2	1	0	1	0	0	0	17
Otu1856	2	382	0	1	0	1	2	0	1	0	0	0	0	0	5
Otu1858	5	376	0	0	1	0	1	3	0	0	0	0	1	1	7
Otu1859	14	378	3	1	5	1	2	5	0	0	1	2	3	3	26
Otu1860	7	380	1	0	3	0	1	2	2	3	0	1	0	1	14
Otu1862	17	376	5	1	4	0	9	9	18	10	7	5	8	6	82
Otu1863	1	380	0	0	0	0	0	0	0	0	0	0	1	1	2
Otu1866	21	379	0	18	4	11	22	0	0	4	0	8	14	6	87
Otu1867	1	380	0	0	1	0	0	0	1	0	1	0	0	0	3
Otu1869	2	380	0	2	0	0	0	0	1	1	0	0	1	0	5
Otu1871	3	379	0	2	0	0	1	0	4	0	0	0	0	0	7
Otu1872	3	384	2	0	0	1	0	3	2	1	1	0	0	0	10
Otu1873	1	380	0	0	1	0	0	0	1	0	0	0	1	0	3
Otu1875	2	380	0	0	1	0	0	0	0	0	0	0	1	2	4
Otu1876	1	380	0	1	1	0	1	0	0	0	0	0	0	0	3
Otu1879	15	381	2	0	3	2	0	1	0	3	4	4	0	4	23
Otu1880	1	383	0	1	0	1	0	0	0	0	0	0	0	0	2
Otu1887	1	378	1	1	0	1	1	0	0	0	0	0	0	0	4
Otu1888	2	380	0	0	0	0	1	0	0	0	2	0	0	2	5
Otu1889	1	380	0	0	0	0	1	0	0	0	0	0	1	0	2
Otu1890	1	373	0	0	2	1	2	0	0	0	0	1	0	0	6
Otu1891	6	380	6	4	16	11	5	12	6	7	0	7	1	1	76
Otu1896	1	378	0	0	0	1	1	0	0	0	0	0	0	0	2
Otu1897	1	380	0	1	1	0	0	0	1	0	0	1	0	0	4
Otu1898	2	380	0	0	1	1	2	0	0	0	0	0	0	0	4
Otu1900	3	382	0	0	0	0	0	0	0	1	0	0	0	3	4
Otu1902	1	380	1	0	0	1	0	1	0	0	0	0	0	0	3
Otu1909	1	378	0	0	0	0	0	0	0	2	0	0	0	0	2
Otu1911	3	380	0	0	0	3	1	0	0	1	1	0	0	0	6
Otu1912	1	380	0	1	1	0	0	0	0	0	0	0	0	0	2
Otu1913	59	380	19	59	44	0	0	0	0	18	0	30	24	0	194
Otu1914	23	380	3	4	6	9	1	3	0	3	0	4	5	1	39
Otu1915	1	381	0	0	0	0	0	0	1	0	0	1	0	0	2
Otu1916	7	376	0	0	2	5	0	0	0	2	0	0	0	1	10
Otu1917	4	379	0	2	2	1	0	0	2	0	1	3	1	1	13
Otu1918	5	380	0	1	0	0	0	0	1	2	0	0	0	3	7
Otu1919	2	380	0	1	4	0	2	1	0	2	0	1	0	1	12
Otu1920	1	380	0	1	1	2	1	0	0	0	0	0	1	0	6
Otu1921	3	376	0	0	1	0	1	0	2	0	3	0	0	0	7
Otu1922	1	380	0	0	0	0	0	0	0	1	2	0	1	0	4
Otu1924	1	380	0	1	0	0	1	0	0	0	0	0	0	0	2
Otu1925	1	380	0	0	1	1	0	0	0	0	0	0	0	0	2
Otu1926	1	381	1	0	0	0	1	1	0	0	0	0	0	0	3
Otu1927	1	380	2	0	2	2	1	1	1	1	0	1	0	0	11
Otu1929	1	378	0	0	0	0	0	0	1	0	1	0	0	0	2
Otu1931	2	381	0	1	1	0	0	0	0	1	0	1	0	0	4
Otu1933	5	382	3	1	5	0	0	1	0	0	0	0	0	0	10
Otu1936	1	380	0	0	0	0	0	0	0	0	1	1	0	0	2
Otu1937	7	380	3	1	3	1	5	2	1	0	2	3	1	0	22
Otu1939	3	376	0	0	0	0	2	1	0	0	0	0	0	1	4
Otu1941	4	379	1	4	4	3	2	1	0	1	0	0	0	0	16
Otu1942	1	378	0	0	0	0	0	0	0	1	0	1	0	0	2
Otu1945	25	375	1	7	2	3	3	7	0	6	2	2	4	0	37
Otu1947	1	378	0	1	0	0	0	1	0	0	0	0	0	0	2
Otu1948	1	375	1	1	0	0	0	0	0	0	0	0	0	0	2
Otu1950	102	380	1	26	41	35	33	18	0	0	19	48	27	2	250
Otu1952	4	378	0	0	4	1	1	0	0	0	0	0	0	0	6
Otu1953	9	380	3	0	0	3	10	3	0	2	0	0	0	0	21
Otu1955	28	382	3	3	0	3	5	13	0	0	1	1	1	0	30
Otu1956	4	378	0	1	3	1	0	1	0	0	1	2	1	0	10
Otu1957	6	376	1	5	0	0	6	0	2	1	0	0	6	3	24
Otu1959	3	380	4	1	0	0	0	0	0	1	0	0	0	0	6
Otu1960	1	378	0	0	0	1	1	0	0	1	0	0	1	0	4
Otu1963	12	383	4	0	1	4	1	8	0	0	0	1	0	0	19
Otu1968	3	380	1	1	0	0	1	2	1	0	0	0	3	0	9
Otu1971	1	376	0	0	0	0	0	1	0	0	0	1	0	0	2
Otu1972	4	380	0	0	2	1	0	2	2	1	3	2	5	2	20
Otu1975	2	378	0	0	0	2	1	0	2	0	2	1	3	2	13
Otu1977	3	380	1	0	0	3	0	0	0	0	0	0	1	0	5
Otu1980	1	380	0	0	0	1	1	0	0	0	0	0	0	0	2
Otu1981	1	378	0	0	1	0	0	2	0	0	0	0	1	0	4
Otu1982	1	380	1	0	0	1	0	1	0	0	0	0	0	0	3
Otu1985	4	378	0	0	1	2	0	1	1	3	2	2	3	3	18
Otu1991	1	376	0	0	1	2	0	0	0	0	0	0	0	0	3
Otu1992	8	380	3	4	0	1	2	1	1	1	2	2	3	0	20
Otu1999	1	376	1	0	0	1	0	0	1	0	0	1	0	0	4
Otu2000	1	379	0	0	0	1	0	0	0	1	0	0	0	0	2
Otu2001	7	378	3	2	1	0	0	2	1	0	1	1	0	0	11
Otu2003	3	380	0	0	0	1	0	2	1	0	0	0	0	0	4
Otu2004	1	381	0	0	0	0	0	0	0	1	0	0	0	1	2
Otu2006	1	380	0	0	1	1	0	0	0	1	0	0	0	0	3
Otu2007	9	380	9	1	0	7	3	2	0	0	0	0	0	1	23
Otu2008	1	380	0	0	1	1	0	0	0	0	1	0	0	0	3
Otu2010	4	378	0	0	2	2	2	2	0	4	2	3	4	0	21
Otu2015	5	380	1	0	0	5	0	0	0	0	1	0	1	0	8
Otu2016	1	352	0	0	0	0	0	0	0	0	1	0	1	0	2
Otu2021	2	380	0	0	0	0	0	0	1	0	0	0	1	1	3
Otu2022	7	381	1	3	1	0	3	0	0	0	0	1	0	1	10
Otu2023	3	379	2	1	3	3	0	1	0	1	1	1	0	0	13
Otu2025	32	377	0	0	0	0	0	0	0	32	1	0	3	5	41
Otu2026	1	378	0	0	0	1	0	0	0	1	0	0	2	0	4
Otu2029	5	379	9	1	0	5	2	6	1	1	1	1	0	0	27
Otu2030	41	379	12	10	7	12	0	0	0	0	1	0	0	0	42
Otu2031	1	380	0	0	0	0	0	0	0	1	0	1	0	0	2
Otu2032	24	383	10	9	0	3	16	0	0	0	0	1	0	1	40
Otu2034	2	380	3	2	1	0	0	1	0	1	0	0	0	0	8
Otu2036	21	380	2	0	0	7	0	0	9	16	4	14	0	21	73
Otu2037	2	363	0	0	0	0	0	0	0	0	0	0	1	2	3
Otu2039	1	379	1	0	0	0	1	2	0	0	0	0	0	0	4
Otu2040	1	379	1	1	0	0	0	0	0	0	0	0	0	0	2
Otu2041	1	378	0	0	0	0	0	2	1	1	0	0	0	0	4
Otu2045	26	380	8	5	0	0	8	2	0	0	4	0	0	9	36
Otu2047	2	381	0	1	0	0	0	0	2	0	0	0	1	1	5
Otu2049	1	334	0	0	1	1	0	0	0	0	0	0	0	0	2
Otu2052	6	384	1	4	4	8	2	4	0	1	0	1	0	0	25
Otu2053	1	380	0	1	0	0	0	0	1	0	0	0	0	1	3
Otu2054	1	380	0	1	0	0	0	0	1	0	0	0	0	0	2
Otu2056	1	373	0	0	0	0	0	1	0	0	1	0	0	0	2
Otu2060	1	373	1	0	0	0	0	0	1	0	0	0	1	1	4
Otu2062	9	379	2	2	2	1	2	2	0	0	1	1	1	0	14
Otu2070	3	380	1	0	1	1	3	0	0	0	1	0	0	0	7
Otu2071	2	379	0	0	0	0	0	0	0	2	0	0	1	0	3
Otu2072	1	380	1	0	1	2	1	0	0	0	0	1	0	0	6
Otu2075	2	383	1	0	1	2	0	0	1	0	2	1	0	0	8
Otu2076	1	311	0	0	0	0	0	0	0	0	1	1	0	0	2
Otu2077	5	380	2	1	1	2	2	1	5	0	0	4	2	1	21
Otu2080	3	382	2	1	1	1	0	3	1	1	2	1	0	1	14
Otu2081	2	378	0	0	0	1	0	1	1	2	1	2	1	2	11
Otu2082	6	380	1	1	2	1	1	6	2	0	0	0	0	0	14
Otu2088	1	377	0	0	0	0	0	0	0	1	0	0	0	2	3
Otu2090	4	376	0	1	1	0	1	0	0	1	0	4	0	0	8
Otu2091	4	380	0	1	0	4	2	0	0	0	0	0	1	0	8
Otu2092	10	380	4	3	1	1	0	8	2	6	0	1	6	1	33
Otu2093	7	376	0	4	4	2	3	0	2	0	3	2	2	0	22
Otu2094	2	379	2	1	1	1	0	0	0	0	0	1	0	0	6
Otu2098	1	380	0	0	0	1	1	0	0	0	0	1	0	0	3
Otu2099	2	378	0	0	2	1	0	0	0	0	0	0	0	1	4
Otu2100	2	376	0	1	0	2	0	0	0	0	0	0	0	0	3
Otu2101	2	384	2	2	1	1	0	1	0	1	0	1	0	0	9
Otu2102	3	380	2	2	3	1	1	1	0	1	0	0	0	0	11
Otu2104	1	380	1	0	0	1	0	0	0	1	1	0	0	0	4
Otu2105	2	378	1	0	0	1	0	0	2	0	0	1	1	0	6
Otu2107	12	379	1	13	9	14	4	5	0	0	4	6	8	10	74
Otu2111	3	383	0	2	1	1	0	4	1	0	1	0	0	0	10
Otu2112	3	380	0	0	0	0	1	0	3	0	0	0	1	0	5
Otu2114	2	378	1	0	0	0	1	2	0	0	0	1	0	0	5
Otu2119	1	379	0	0	1	0	0	0	1	1	0	0	0	1	4
Otu2121	1	376	2	0	0	0	0	1	0	0	1	0	0	0	4
Otu2124	3	379	1	0	0	0	1	0	0	2	0	2	0	0	6
Otu2125	1	253	1	0	0	0	0	0	0	0	0	1	0	0	2
Otu2128	1	377	0	0	0	0	0	0	1	0	0	0	1	0	2
Otu2131	1	384	0	0	0	0	0	0	0	1	0	2	0	1	4
Otu2132	1	379	0	0	0	0	1	1	0	1	1	0	0	0	4
Otu2134	5	380	0	0	0	1	0	2	3	0	0	0	2	0	8
Otu2139	9	381	0	1	7	1	1	3	0	0	0	2	0	0	15
Otu2141	2	380	0	4	0	2	1	1	0	3	0	0	3	1	15
Otu2143	4	380	0	0	1	0	0	0	0	4	0	1	4	0	10
Otu2144	1	379	0	1	1	0	0	0	1	0	2	0	1	0	6
Otu2145	3	378	1	1	0	0	0	2	1	0	0	0	2	0	7
Otu2150	4	378	0	1	0	2	1	3	2	1	2	1	1	0	14
Otu2151	1	380	0	0	0	0	0	1	0	1	0	0	0	0	2
Otu2152	6	378	3	5	5	2	6	4	1	0	0	4	1	0	31
Otu2155	2	379	0	1	1	1	1	0	0	0	0	0	1	1	6
Otu2157	1	378	1	0	0	1	0	0	1	0	0	0	0	0	3
Otu2159	3	378	0	0	2	1	0	0	0	1	0	1	1	5	11
Otu2160	1	378	0	1	1	0	0	0	0	0	0	0	0	0	2
Otu2161	3	380	0	0	0	0	1	0	0	0	0	2	1	0	4
Otu2162	2	380	1	2	0	0	0	2	0	2	2	1	0	0	10
Otu2165	6	378	6	0	0	0	0	0	1	0	0	0	0	0	7
Otu2166	4	380	0	1	2	2	1	0	2	1	1	1	1	0	12
Otu2171	1	360	0	0	1	1	1	0	0	0	0	0	0	0	3
Otu2173	128	383	0	0	0	0	0	0	7	17	23	2	18	217	284
Otu2174	106	380	4	0	3	5	2	1	16	20	24	31	5	2	113
Otu2175	105	377	0	1	1	0	0	1	15	45	34	19	18	131	265
Otu2176	91	378	11	14	23	10	11	21	4	13	6	16	30	2	161
Otu2177	74	382	26	18	12	22	13	23	28	27	14	27	49	36	295
Otu2178	68	381	5	11	6	7	3	8	3	7	7	6	4	14	81
Otu2179	67	378	1	5	0	0	1	3	16	48	3	14	55	68	214
Otu2180	65	380	16	13	15	24	10	11	2	1	0	7	3	4	106
Otu2181	60	376	3	6	4	5	6	111	0	2	1	2	11	1	152
Otu2182	50	376	0	0	0	0	0	0	18	3	11	6	0	15	53
Otu2183	49	378	7	11	10	5	5	4	2	3	0	1	3	1	52
Otu2184	49	380	0	0	0	0	0	0	4	21	1	0	12	51	89
Otu2185	47	376	0	0	0	0	0	0	2	0	6	47	0	0	55
Otu2186	42	378	1	3	1	1	4	0	6	25	9	3	10	20	83
Otu2187	41	378	4	2	12	6	6	35	2	4	3	6	13	27	120
Otu2188	38	380	1	0	5	0	0	10	1	2	0	38	1	1	59
Otu2189	37	374	0	0	0	0	29	0	12	1	11	18	5	5	81
Otu2190	36	377	0	0	0	0	0	0	1	12	2	1	18	38	72
Otu2191	35	376	2	2	0	32	0	2	4	3	1	1	3	0	50
Otu2192	34	380	0	2	0	0	1	0	5	11	0	0	17	2	38
Otu2193	33	378	3	2	3	28	10	27	9	7	2	9	2	2	104
Otu2194	30	376	23	0	0	0	0	0	1	0	1	2	5	0	32
Otu2195	29	381	0	4	6	1	9	5	3	0	2	5	5	1	41
Otu2196	29	379	0	0	0	0	0	0	2	29	9	2	0	0	42
Otu2197	29	363	0	0	0	0	0	0	0	0	0	0	29	0	29
Otu2198	28	378	29	0	0	0	1	0	0	1	0	5	3	1	40
Otu2199	27	379	0	0	0	0	0	0	0	18	0	0	4	14	36
Otu2200	27	380	7	1	16	1	2	6	3	1	0	2	2	3	44
Otu2201	26	382	3	0	0	28	16	0	0	0	1	0	2	0	50
Otu2202	25	380	0	0	0	0	0	0	1	4	2	1	7	25	40
Otu2203	25	383	16	1	1	1	1	0	27	2	2	1	2	2	56
Otu2204	25	378	0	0	0	0	0	0	25	2	18	8	1	0	54
Otu2205	25	378	0	0	0	0	0	0	0	6	0	1	5	26	38
Otu2206	24	380	7	2	0	6	0	2	0	3	5	3	5	2	35
Otu2207	24	399	6	5	13	3	16	27	3	0	1	11	3	3	91
Otu2208	24	380	3	2	3	5	2	1	0	3	3	4	7	1	34
Otu2209	23	380	6	3	8	1	5	1	4	7	6	0	6	1	48
Otu2210	23	379	0	0	0	0	0	1	0	9	3	3	12	26	54
Otu2211	28	379	10	12	18	26	50	13	43	20	9	22	29	11	263
Otu2212	22	381	5	2	4	6	9	5	1	23	0	5	8	1	69
Otu2213	39	380	1	15	23	7	2	4	7	0	0	39	2	10	110
Otu2214	22	381	1	1	0	0	1	1	0	2	2	2	15	9	34
Otu2215	34	380	24	8	7	34	16	12	22	3	38	36	17	0	217
Otu2216	30	377	1	2	3	3	4	1	30	21	11	4	8	2	90
Otu2217	20	380	0	0	2	20	1	1	0	0	0	0	1	0	25
Otu2218	20	380	2	1	4	4	3	5	3	2	1	8	1	0	34
Otu2219	20	380	10	9	3	13	10	4	5	4	4	3	9	1	75
Otu2220	20	376	0	1	0	0	0	0	9	5	11	22	6	0	54
Otu2221	32	381	2	4	8	2	5	11	21	16	23	19	13	36	160
Otu2222	19	380	13	23	17	14	15	18	0	0	0	5	3	0	108
Otu2223	19	377	22	13	2	7	12	5	4	1	3	1	5	0	75
Otu2224	19	378	6	0	3	6	0	5	1	1	0	0	1	0	23
Otu2225	19	381	2	11	25	13	19	8	7	6	4	5	1	5	106
Otu2226	19	378	0	1	21	0	0	0	0	0	0	0	0	0	22
Otu2227	32	376	1	0	1	0	0	1	8	10	4	5	35	18	83
Otu2228	28	380	30	24	27	20	30	8	10	8	7	8	10	5	187
Otu2229	17	379	1	7	6	5	5	2	0	0	3	1	0	0	30
Otu2230	18	376	8	0	1	1	4	41	7	0	0	3	12	0	77
Otu2231	17	382	5	2	4	5	0	6	0	0	0	0	1	0	23
Otu2232	16	380	0	0	4	0	0	4	1	6	1	6	10	0	32
Otu2233	16	379	0	0	0	0	0	0	2	7	1	1	2	18	31
Otu2234	18	381	17	12	8	18	17	16	13	13	13	19	17	8	171
Otu2235	55	378	13	14	7	16	9	19	3	2	1	1	3	3	91
Otu2236	32	382	0	0	0	0	0	0	18	6	4	4	0	16	48
Otu2237	60	380	8	11	6	4	11	13	7	13	17	14	8	8	120
Otu2238	16	376	0	2	0	1	1	2	0	1	0	1	16	0	24
Otu2239	16	380	0	1	0	4	0	0	3	4	16	10	3	1	42
Otu2240	16	380	4	1	16	0	0	0	2	0	0	0	0	0	23
Otu2241	16	376	2	1	0	0	0	0	0	15	1	0	16	15	50
Otu2242	15	378	0	2	2	0	0	0	0	0	2	19	0	0	25
Otu2243	15	380	2	0	0	13	1	0	1	0	0	1	0	0	18
Otu2244	15	379	1	3	1	3	2	5	2	10	2	1	7	3	40
Otu2245	15	378	4	9	10	8	2	16	3	8	4	4	16	0	84
Otu2246	15	376	2	8	2	0	9	1	1	24	3	1	9	11	71
Otu2247	47	381	30	1	1	19	6	55	1	5	3	7	3	6	137
Otu2248	14	379	0	1	1	1	0	1	0	0	0	14	0	0	18
Otu2249	14	376	2	0	0	0	0	5	5	5	2	29	1	3	52
Otu2250	14	376	1	0	0	0	0	0	11	9	0	2	5	17	45
Otu2251	14	380	16	4	15	15	1	1	0	0	7	2	0	0	61
Otu2252	14	380	15	10	0	0	0	12	3	5	0	0	0	0	45
Otu2253	14	380	0	0	0	0	0	0	15	1	4	0	0	0	20
Otu2254	24	378	20	15	12	24	12	6	4	5	4	10	0	1	113
Otu2255	14	380	1	3	1	4	5	6	4	14	4	3	6	4	55
Otu2256	59	380	0	6	2	6	0	1	35	6	15	14	11	20	116
Otu2257	14	382	15	0	1	16	0	2	0	2	0	0	0	0	36
Otu2258	28	379	17	10	7	7	15	8	14	7	11	14	11	2	123
Otu2259	14	376	2	0	0	3	4	1	10	14	8	18	14	15	89
Otu2260	14	381	8	0	1	14	6	3	2	2	2	3	0	0	41
Otu2261	14	377	2	0	0	0	0	0	6	9	1	1	13	9	41
Otu2262	29	382	0	13	4	0	5	0	2	8	0	2	13	32	79
Otu2263	26	376	0	0	0	0	0	0	12	39	6	4	14	31	106
Otu2264	13	379	3	0	3	4	7	8	1	0	0	1	0	0	27
Otu2265	29	376	7	2	6	2	6	5	16	12	14	14	4	0	88
Otu2266	17	380	10	0	1	12	4	0	13	12	14	14	4	17	101
Otu2267	13	380	6	1	6	3	5	7	3	4	3	12	3	2	55
Otu2268	45	378	15	9	12	12	9	16	12	21	7	6	16	56	191
Otu2269	18	380	1	1	1	2	3	0	8	13	4	9	6	0	48
Otu2270	13	378	0	1	0	0	1	0	11	8	5	2	5	15	48
Otu2271	13	378	0	0	0	0	0	0	1	4	0	13	0	13	31
Otu2272	13	380	0	1	1	0	0	0	2	2	7	1	13	9	36
Otu2273	13	380	10	9	13	13	9	6	4	5	4	6	8	2	89
Otu2274	15	377	15	7	13	8	4	3	3	4	0	11	2	0	70
Otu2275	13	382	3	3	2	10	0	4	21	16	9	4	11	14	97
Otu2276	19	381	13	9	12	15	11	12	10	4	3	5	8	5	107
Otu2277	12	378	7	4	5	9	4	3	2	0	2	2	3	2	43
Otu2278	12	380	0	0	0	0	0	4	9	12	11	6	6	0	48
Otu2279	34	380	13	9	9	7	10	7	14	30	1	36	23	17	176
Otu2280	25	381	15	12	13	3	2	25	2	7	13	7	14	0	113
Otu2281	15	380	0	10	4	11	15	13	6	0	2	5	1	1	68
Otu2282	12	377	0	0	0	0	0	0	9	3	12	7	1	0	32
Otu2283	12	378	15	15	9	15	9	4	1	2	3	11	3	3	90
Otu2284	12	380	13	3	6	10	1	10	1	1	0	2	2	1	50
Otu2285	12	378	1	2	4	3	3	8	3	0	1	3	2	0	30
Otu2286	12	382	3	1	6	8	3	0	6	1	1	7	0	12	48
Otu2287	20	380	10	1	16	0	21	2	0	13	0	6	1	0	70
Otu2288	12	379	0	0	0	0	0	0	0	0	0	3	0	13	16
Otu2289	12	378	0	0	0	0	1	0	7	4	3	1	3	21	40
Otu2290	23	376	8	17	1	8	6	24	8	14	7	14	29	10	146
Otu2291	11	383	0	0	0	1	0	0	8	4	11	6	0	1	31
[truncated: 9,220 more rows]

## Sheet: Figure 3
Figure 3 Copy numbers of archaeal (AOA) and bacterial (AOB) amoA , nirS , narG , nosZ and nirK genes in the soil as affected by addition treatments in the drip-irrigated cotton field.
Teatment	AOA(copies g-1 dry soil)	Mean	SE	AOB(copies g-1 dry soil)	Mean	SE	AOA/AOB ratio	Mean	SE	narG(copies g-1 dry soil)	Mean	SE	nirS(copies g-1 dry soil)	Mean	SE	nirK(copies g-1 dry soil)	Mean	SE	nosZ(copies g-1 dry soil)	Mean	SE
Control	8.25106e+08			1.4112e+07			58.4685			9.61244e+06			2.18658e+06			229927			5.90109e+06
Control	1.47986e+09			1.83477e+07			80.6561			1.00745e+07			2.41243e+06			188753			4.85665e+06
Control	6.64377e+08			6.99478e+06			94.9818			4.59648e+06			6.26806e+07			90207.8			1.40612e+06
Control	8.6551e+08	9.58712e+08	1.79063e+08	3.76234e+06	1.08042e+07	3.31594e+06	230.045	116.038	38.7375	3.67538e+06	6.9897e+06	1.661e+06	3.37741e+07	2.52634e+07	1.4512e+07	96502.3	151347	34544.6	735138	3.22475e+06	1.26923e+06
Urea	6.99521e+08			4.52914e+07			15.4449			1.62821e+07			2.19683e+06			112942			3.92761e+06
Urea	4.28119e+08			2.78777e+07			15.357			4.58334e+06			1.25582e+06			224076			2.02963e+06
Urea	4.99805e+08			4.96949e+06			100.575			3.16362e+06			1.04574e+06			106840			904395
Urea	7.33095e+08	5.90135e+08	7.46166e+07	7.31177e+06	2.13626e+07	9.49208e+06	100.262	57.9098	24.5426	9.49351e+06	8.38064e+06	2.96238e+06	1.50949e+07	4.89832e+06	3.40805e+06	164133	151998	27244.4	2.00617e+06	2.21695e+06	627738
U+M	3.01578e+09			1.56137e+08			19.315			2.08338e+08			2.33979e+06			910114			3.59071e+07
U+M	1.47279e+09			5.3991e+07			27.2784			5.98625e+07			4.38954e+06			853195			2.1064e+07
U+M	4.45698e+09			2.99157e+08			14.8985			4.53048e+08			1.15533e+08			351192			1.15961e+08
U+M	1.80902e+09	2.68864e+09	6.76146e+08	1.22122e+08	1.57852e+08	5.16671e+07	14.8132	19.0763	2.92917	3.97546e+08	2.79699e+08	9.00732e+07	5.12076e+07	4.33674e+07	2.65704e+07	704834	704834	125570	5.90926e+07	5.80061e+07	2.08427e+07
M	1.21041e+09			1.21404e+08			9.97009			1.66971e+08			2.47182e+07			468611			3.44927e+07
M	1.36617e+09			1.9898e+08			6.86584			3.36534e+08			1.68041e+07			882450			3.78238e+07
M	3.22295e+09			1.71291e+08			18.8156			2.60101e+08			4.43565e+07			645313			3.60869e+07
M	3.49283e+09	2.32309e+09	6.00819e+08	9.59375e+07	1.46903e+08	2.33711e+07	36.4073	18.0147	6.63288	1.76838e+08	2.35111e+08	3.97386e+07	618718	2.16244e+07	9.08659e+06	682032	669601	84875.5	2.78448e+07	3.4062e+07	2.18118e+06

## Sheet: OTU table
Otu_num	genus	abudance	A1(Control)	A2(Control)	A3(Control)	B1(Urea)	B2(Urea)	B3(Urea)	C1(M)	C2(M)	C3(M)	D1(U+M)	D2((U+M)	D3(U+M)	Total	class	order	family
Otu25601	Denitrobacterium	2	0	0	0	0	0	0	0	0	0	2	0	0	Actinobacteria	Actinobacteria	Coriobacteriales	Coriobacteriaceae
Otu23202	Denitrobacterium	1	0	0	0	0	0	0	1	0	0	0	0	1	Actinobacteria	Actinobacteria	Coriobacteriales	Coriobacteriaceae
Otu23202	Denitrobacterium	1	0	0	0	0	0	0	1	0	0	0	0	1	Actinobacteria	Actinobacteria	Coriobacteriales	Coriobacteriaceae
Otu1489	Nitrococcus	2	0	0	0	0	0	0	0	2	0	0	2	2	Proteobacteria	Gammaproteobacteria	Chromatiales	Ectothiorhodospiraceae
Otu78	Nitrolancea	86	10	29	18	28	29	33	6	6	0	24	18	11	Chloroflexi	Thermomicrobia	Sphaerobacterales	Sphaerobacteraceae
Otu91	Nitrolancea	79	7	4	7	1	4	6	36	38	24	25	43	112	Chloroflexi	Thermomicrobia	Sphaerobacterales	Sphaerobacteraceae
Otu488	Nitrolancea	62	20	42	23	34	29	39	22	21	23	21	29	4	Chloroflexi	Thermomicrobia	Sphaerobacterales	Sphaerobacteraceae
Otu547	Nitrolancea	12	0	1	5	1	1	6	8	6	3	5	8	12	Chloroflexi	Thermomicrobia	Sphaerobacterales	Sphaerobacteraceae
Otu711	Nitrolancea	29	4	8	5	7	4	11	2	5	2	3	4	8	Chloroflexi	Thermomicrobia	Sphaerobacterales	Sphaerobacteraceae
Otu790	Nitrolancea	21	0	0	1	0	1	5	7	20	4	2	21	23	Chloroflexi	Thermomicrobia	Sphaerobacterales	Sphaerobacteraceae
Otu1129	Nitrolancea	6	2	2	1	1	0	0	0	0	4	0	7	5	Chloroflexi	Thermomicrobia	Sphaerobacterales	Sphaerobacteraceae
Otu1156	Nitrolancea	5	0	4	1	3	3	3	1	0	1	0	3	0	Chloroflexi	Thermomicrobia	Sphaerobacterales	Sphaerobacteraceae
Otu28208	Nitrolancea	2	0	0	0	2	0	0	0	0	0	0	0	0	Chloroflexi	Thermomicrobia	Sphaerobacterales	Sphaerobacteraceae
Otu30873	Nitrolancea	1	1	0	0	1	0	0	0	0	0	0	0	0	Chloroflexi	Thermomicrobia	Sphaerobacterales	Sphaerobacteraceae
Otu25536	Nitrolancea	1	0	1	0	0	1	0	0	0	0	1	0	0	Chloroflexi	Thermomicrobia	Sphaerobacterales	Sphaerobacteraceae
Otu26029	Nitrolancea	2	0	0	0	0	0	2	0	0	0	0	0	0	Chloroflexi	Thermomicrobia	Sphaerobacterales	Sphaerobacteraceae
Otu27326	Nitrolancea	3	0	0	0	0	0	0	0	0	0	0	0	3	Chloroflexi	Thermomicrobia	Sphaerobacterales	Sphaerobacteraceae
Otu27615	Nitrolancea	1	0	0	1	1	0	0	0	0	0	0	0	0	Chloroflexi	Thermomicrobia	Sphaerobacterales	Sphaerobacteraceae
Otu28150	Nitrolancea	1	0	0	0	0	0	0	0	0	1	0	0	1	Chloroflexi	Thermomicrobia	Sphaerobacterales	Sphaerobacteraceae
Otu20750	Nitrolancea	2	0	1	0	0	0	0	0	0	0	0	0	1	Chloroflexi	Thermomicrobia	Sphaerobacterales	Sphaerobacteraceae
Otu20760	Nitrolancea	3	1	0	0	0	1	0	0	1	0	0	0	2	Chloroflexi	Thermomicrobia	Sphaerobacterales	Sphaerobacteraceae
Otu20829	Nitrolancea	1	1	0	1	0	0	0	0	0	0	0	0	0	Chloroflexi	Thermomicrobia	Sphaerobacterales	Sphaerobacteraceae
Otu21051	Nitrolancea	1	1	0	0	0	0	0	0	0	0	1	0	0	Chloroflexi	Thermomicrobia	Sphaerobacterales	Sphaerobacteraceae
Otu21211	Nitrolancea	2	0	0	0	0	2	0	0	0	1	0	0	0	Chloroflexi	Thermomicrobia	Sphaerobacterales	Sphaerobacteraceae
Otu23231	Nitrolancea	1	0	0	0	0	0	1	0	0	0	1	1	0	Chloroflexi	Thermomicrobia	Sphaerobacterales	Sphaerobacteraceae
Otu18394	Nitrolancea	9	0	0	1	0	9	0	0	0	0	1	0	0	Chloroflexi	Thermomicrobia	Sphaerobacterales	Sphaerobacteraceae
Otu19060	Nitrolancea	2	0	0	2	1	0	0	0	0	0	0	0	0	Chloroflexi	Thermomicrobia	Sphaerobacterales	Sphaerobacteraceae
Otu19068	Nitrolancea	1	0	0	0	0	0	0	0	0	0	2	0	0	Chloroflexi	Thermomicrobia	Sphaerobacterales	Sphaerobacteraceae
Otu19362	Nitrolancea	5	0	0	0	0	0	0	0	0	0	0	5	0	Chloroflexi	Thermomicrobia	Sphaerobacterales	Sphaerobacteraceae
Otu19374	Nitrolancea	2	1	0	2	0	0	0	0	0	0	0	0	1	Chloroflexi	Thermomicrobia	Sphaerobacterales	Sphaerobacteraceae
Otu20738	Nitrolancea	2	0	0	0	0	0	2	0	0	0	0	0	0	Chloroflexi	Thermomicrobia	Sphaerobacterales	Sphaerobacteraceae
Otu20750	Nitrolancea	2	0	1	0	0	0	0	0	0	0	0	0	1	Chloroflexi	Thermomicrobia	Sphaerobacterales	Sphaerobacteraceae
Otu20760	Nitrolancea	3	1	0	0	0	1	0	0	1	0	0	0	2	Chloroflexi	Thermomicrobia	Sphaerobacterales	Sphaerobacteraceae
Otu20829	Nitrolancea	1	1	0	1	0	0	0	0	0	0	0	0	0	Chloroflexi	Thermomicrobia	Sphaerobacterales	Sphaerobacteraceae
Otu21051	Nitrolancea	1	1	0	0	0	0	0	0	0	0	1	0	0	Chloroflexi	Thermomicrobia	Sphaerobacterales	Sphaerobacteraceae
Otu21211	Nitrolancea	2	0	0	0	0	2	0	0	0	1	0	0	0	Chloroflexi	Thermomicrobia	Sphaerobacterales	Sphaerobacteraceae
Otu23231	Nitrolancea	1	0	0	0	0	0	1	0	0	0	1	1	0	Chloroflexi	Thermomicrobia	Sphaerobacterales	Sphaerobacteraceae
Otu15377	Nitrolancea	3	0	0	3	0	0	2	1	0	0	1	0	0	Chloroflexi	Thermomicrobia	Sphaerobacterales	Sphaerobacteraceae
Otu16259	Nitrolancea	1	0	0	0	0	0	0	0	0	0	0	1	1	Chloroflexi	Thermomicrobia	Sphaerobacterales	Sphaerobacteraceae
Otu16914	Nitrolancea	2	2	0	0	0	0	0	0	0	0	0	0	0	Chloroflexi	Thermomicrobia	Sphaerobacterales	Sphaerobacteraceae
Otu17399	Nitrolancea	6	3	0	1	1	1	1	0	0	0	0	0	1	Chloroflexi	Thermomicrobia	Sphaerobacterales	Sphaerobacteraceae
Otu17555	Nitrolancea	1	0	0	0	1	0	1	0	0	0	0	0	0	Chloroflexi	Thermomicrobia	Sphaerobacterales	Sphaerobacteraceae
Otu17832	Nitrolancea	2	0	0	1	0	0	1	1	1	2	1	0	1	Chloroflexi	Thermomicrobia	Sphaerobacterales	Sphaerobacteraceae
Otu18308	Nitrolancea	1	1	0	1	1	0	0	0	0	0	0	0	0	Chloroflexi	Thermomicrobia	Sphaerobacterales	Sphaerobacteraceae
Otu13409	Nitrolancea	3	1	3	1	1	2	1	2	0	1	2	0	2	Chloroflexi	Thermomicrobia	Sphaerobacterales	Sphaerobacteraceae
Otu13934	Nitrolancea	1	0	0	0	0	0	0	1	0	0	0	0	1	Chloroflexi	Thermomicrobia	Sphaerobacterales	Sphaerobacteraceae
Otu14322	Nitrolancea	12	6	0	0	0	0	0	12	0	0	0	0	2	Chloroflexi	Thermomicrobia	Sphaerobacterales	Sphaerobacteraceae
Otu14326	Nitrolancea	7	0	0	0	0	1	0	0	0	10	0	0	0	Chloroflexi	Thermomicrobia	Sphaerobacterales	Sphaerobacteraceae
Otu14908	Nitrolancea	2	0	0	0	0	0	0	1	2	0	2	0	0	Chloroflexi	Thermomicrobia	Sphaerobacterales	Sphaerobacteraceae
Otu10633	Nitrolancea	1	0	1	0	1	0	0	0	0	0	0	0	0	Chloroflexi	Thermomicrobia	Sphaerobacterales	Sphaerobacteraceae
Otu10856	Nitrolancea	7	1	3	1	1	1	3	5	6	0	1	3	7	Chloroflexi	Thermomicrobia	Sphaerobacterales	Sphaerobacteraceae
Otu11647	Nitrolancea	1	0	1	0	1	0	1	0	0	0	0	0	1	Chloroflexi	Thermomicrobia	Sphaerobacterales	Sphaerobacteraceae
Otu12152	Nitrolancea	2	1	0	0	3	0	2	0	0	1	0	0	0	Chloroflexi	Thermomicrobia	Sphaerobacterales	Sphaerobacteraceae
Otu12688	Nitrolancea	4	0	0	0	0	0	0	1	3	0	0	1	0	Chloroflexi	Thermomicrobia	Sphaerobacterales	Sphaerobacteraceae
Otu12931	Nitrolancea	2	0	1	0	2	0	1	0	0	0	1	0	0	Chloroflexi	Thermomicrobia	Sphaerobacterales	Sphaerobacteraceae
Otu8669	Nitrolancea	3	0	0	1	0	0	0	1	0	0	2	1	1	Chloroflexi	Thermomicrobia	Sphaerobacterales	Sphaerobacteraceae
Otu8905	Nitrolancea	6	0	0	3	6	0	5	0	0	0	0	0	0	Chloroflexi	Thermomicrobia	Sphaerobacterales	Sphaerobacteraceae
Otu9008	Nitrolancea	2	0	0	2	1	0	0	0	0	0	0	0	0	Chloroflexi	Thermomicrobia	Sphaerobacterales	Sphaerobacteraceae
Otu9028	Nitrolancea	6	2	1	1	2	2	2	0	0	0	0	1	0	Chloroflexi	Thermomicrobia	Sphaerobacterales	Sphaerobacteraceae
Otu9159	Nitrolancea	1	1	0	0	0	0	1	0	0	0	0	1	1	Chloroflexi	Thermomicrobia	Sphaerobacterales	Sphaerobacteraceae
Otu9259	Nitrolancea	9	5	1	8	9	1	0	4	0	0	0	1	0	Chloroflexi	Thermomicrobia	Sphaerobacterales	Sphaerobacteraceae
Otu9357	Nitrolancea	1	0	0	1	0	0	0	0	1	0	0	0	0	Chloroflexi	Thermomicrobia	Sphaerobacterales	Sphaerobacteraceae
Otu9627	Nitrolancea	4	3	1	0	1	0	2	0	0	1	0	3	5	Chloroflexi	Thermomicrobia	Sphaerobacterales	Sphaerobacteraceae
Otu10150	Nitrolancea	1	1	0	0	0	1	1	0	0	0	0	0	0	Chloroflexi	Thermomicrobia	Sphaerobacterales	Sphaerobacteraceae
Otu10360	Nitrolancea	2	2	0	0	0	0	0	1	2	0	3	0	0	Chloroflexi	Thermomicrobia	Sphaerobacterales	Sphaerobacteraceae
Otu5883	Nitrolancea	2	0	0	0	0	0	1	2	2	0	0	0	0	Chloroflexi	Thermomicrobia	Sphaerobacterales	Sphaerobacteraceae
Otu5888	Nitrolancea	2	2	2	0	0	2	3	1	0	0	0	1	0	Chloroflexi	Thermomicrobia	Sphaerobacterales	Sphaerobacteraceae
Otu5910	Nitrolancea	3	0	0	0	1	1	0	2	2	2	0	2	2	Chloroflexi	Thermomicrobia	Sphaerobacterales	Sphaerobacteraceae
Otu6099	Nitrolancea	8	0	0	0	0	0	0	0	0	0	0	0	9	Chloroflexi	Thermomicrobia	Sphaerobacterales	Sphaerobacteraceae
Otu6134	Nitrolancea	1	0	1	0	0	0	0	0	0	0	0	1	0	Chloroflexi	Thermomicrobia	Sphaerobacterales	Sphaerobacteraceae
Otu6244	Nitrolancea	1	1	0	0	1	0	0	1	0	1	0	0	1	Chloroflexi	Thermomicrobia	Sphaerobacterales	Sphaerobacteraceae
Otu6953	Nitrolancea	1	0	0	0	0	0	0	0	0	0	0	0	2	Chloroflexi	Thermomicrobia	Sphaerobacterales	Sphaerobacteraceae
Otu7075	Nitrolancea	1	0	0	1	0	0	0	0	0	0	0	0	1	Chloroflexi	Thermomicrobia	Sphaerobacterales	Sphaerobacteraceae
Otu7536	Nitrolancea	8	0	5	1	2	0	3	3	0	0	1	4	1	Chloroflexi	Thermomicrobia	Sphaerobacterales	Sphaerobacteraceae
Otu7574	Nitrolancea	2	0	2	0	1	0	0	0	0	0	0	0	0	Chloroflexi	Thermomicrobia	Sphaerobacterales	Sphaerobacteraceae
Otu8163	Nitrolancea	2	1	0	1	1	0	1	0	0	0	0	0	0	Chloroflexi	Thermomicrobia	Sphaerobacterales	Sphaerobacteraceae
Otu8452	Nitrolancea	2	0	0	0	0	0	0	0	1	0	0	0	2	Chloroflexi	Thermomicrobia	Sphaerobacterales	Sphaerobacteraceae
Otu8625	Nitrolancea	1	0	1	0	0	1	0	0	0	0	0	0	0	Chloroflexi	Thermomicrobia	Sphaerobacterales	Sphaerobacteraceae
Otu8669	Nitrolancea	3	0	0	1	0	0	0	1	0	0	2	1	1	Chloroflexi	Thermomicrobia	Sphaerobacterales	Sphaerobacteraceae
Otu8905	Nitrolancea	6	0	0	3	6	0	5	0	0	0	0	0	0	Chloroflexi	Thermomicrobia	Sphaerobacterales	Sphaerobacteraceae
Otu9008	Nitrolancea	2	0	0	2	1	0	0	0	0	0	0	0	0	Chloroflexi	Thermomicrobia	Sphaerobacterales	Sphaerobacteraceae
Otu9028	Nitrolancea	6	2	1	1	2	2	2	0	0	0	0	1	0	Chloroflexi	Thermomicrobia	Sphaerobacterales	Sphaerobacteraceae
Otu9159	Nitrolancea	1	1	0	0	0	0	1	0	0	0	0	1	1	Chloroflexi	Thermomicrobia	Sphaerobacterales	Sphaerobacteraceae
Otu9259	Nitrolancea	9	5	1	8	9	1	0	4	0	0	0	1	0	Chloroflexi	Thermomicrobia	Sphaerobacterales	Sphaerobacteraceae
Otu9357	Nitrolancea	1	0	0	1	0	0	0	0	1	0	0	0	0	Chloroflexi	Thermomicrobia	Sphaerobacterales	Sphaerobacteraceae
Otu9627	Nitrolancea	4	3	1	0	1	0	2	0	0	1	0	3	5	Chloroflexi	Thermomicrobia	Sphaerobacterales	Sphaerobacteraceae
Otu10150	Nitrolancea	1	1	0	0	0	1	1	0	0	0	0	0	0	Chloroflexi	Thermomicrobia	Sphaerobacterales	Sphaerobacteraceae
Otu10360	Nitrolancea	2	2	0	0	0	0	0	1	2	0	3	0	0	Chloroflexi	Thermomicrobia	Sphaerobacterales	Sphaerobacteraceae
Otu3691	Nitrolancea	17	1	1	0	1	0	0	10	12	9	6	1	18	Chloroflexi	Thermomicrobia	Sphaerobacterales	Sphaerobacteraceae
Otu3913	Nitrolancea	2	0	0	0	0	2	0	0	0	0	0	0	0	Chloroflexi	Thermomicrobia	Sphaerobacterales	Sphaerobacteraceae
Otu4231	Nitrolancea	1	0	0	0	1	0	1	0	0	0	0	0	0	Chloroflexi	Thermomicrobia	Sphaerobacterales	Sphaerobacteraceae
Otu4233	Nitrolancea	1	0	0	0	0	0	0	0	2	0	1	0	0	Chloroflexi	Thermomicrobia	Sphaerobacterales	Sphaerobacteraceae
Otu4290	Nitrolancea	1	0	1	0	0	0	0	0	0	0	0	0	1	Chloroflexi	Thermomicrobia	Sphaerobacterales	Sphaerobacteraceae
Otu4496	Nitrolancea	2	0	0	0	0	0	2	0	0	1	1	0	0	Chloroflexi	Thermomicrobia	Sphaerobacterales	Sphaerobacteraceae
Otu4561	Nitrolancea	1	1	0	0	2	0	0	0	0	0	0	0	0	Chloroflexi	Thermomicrobia	Sphaerobacterales	Sphaerobacteraceae
Otu4683	Nitrolancea	12	1	0	3	8	2	18	0	2	0	3	0	0	Chloroflexi	Thermomicrobia	Sphaerobacterales	Sphaerobacteraceae
Otu4782	Nitrolancea	8	5	4	2	4	3	1	0	2	0	0	1	0	Chloroflexi	Thermomicrobia	Sphaerobacterales	Sphaerobacteraceae
Otu4799	Nitrolancea	4	0	4	1	0	0	0	0	0	0	0	0	0	Chloroflexi	Thermomicrobia	Sphaerobacterales	Sphaerobacteraceae
Otu4865	Nitrolancea	4	4	4	3	2	3	0	2	0	1	1	0	0	Chloroflexi	Thermomicrobia	Sphaerobacterales	Sphaerobacteraceae
Otu5321	Nitrolancea	2	0	1	0	2	0	1	0	0	0	0	0	0	Chloroflexi	Thermomicrobia	Sphaerobacterales	Sphaerobacteraceae
Otu5322	Nitrolancea	1	1	0	0	1	1	0	0	0	2	1	0	0	Chloroflexi	Thermomicrobia	Sphaerobacterales	Sphaerobacteraceae
Otu5325	Nitrolancea	1	1	0	0	0	0	0	1	0	0	0	0	0	Chloroflexi	Thermomicrobia	Sphaerobacterales	Sphaerobacteraceae
Otu5687	Nitrolancea	8	1	4	5	4	1	1	2	3	1	8	3	5	Chloroflexi	Thermomicrobia	Sphaerobacterales	Sphaerobacteraceae
Otu5692	Nitrolancea	12	6	6	4	8	0	13	2	1	1	0	0	3	Chloroflexi	Thermomicrobia	Sphaerobacterales	Sphaerobacteraceae
Otu5701	Nitrolancea	12	6	10	8	16	1	3	0	6	3	5	7	3	Chloroflexi	Thermomicrobia	Sphaerobacterales	Sphaerobacteraceae
Otu2640	Nitrolancea	10	1	3	8	7	0	10	2	3	2	3	1	5	Chloroflexi	Thermomicrobia	Sphaerobacterales	Sphaerobacteraceae
Otu2649	Nitrolancea	6	1	3	0	6	5	5	0	3	0	3	2	1	Chloroflexi	Thermomicrobia	Sphaerobacterales	Sphaerobacteraceae
Otu2742	Nitrolancea	7	0	0	0	1	0	0	7	0	0	2	2	1	Chloroflexi	Thermomicrobia	Sphaerobacterales	Sphaerobacteraceae
Otu2856	Nitrolancea	2	0	0	0	0	0	0	0	0	0	1	0	2	Chloroflexi	Thermomicrobia	Sphaerobacterales	Sphaerobacteraceae
Otu3026	Nitrolancea	1	1	0	1	0	0	0	1	0	0	0	0	0	Chloroflexi	Thermomicrobia	Sphaerobacterales	Sphaerobacteraceae
Otu3088	Nitrolancea	1	0	0	0	0	0	0	1	1	0	0	1	1	Chloroflexi	Thermomicrobia	Sphaerobacterales	Sphaerobacteraceae
Otu3195	Nitrolancea	1	1	0	0	0	0	1	0	0	1	0	0	0	Chloroflexi	Thermomicrobia	Sphaerobacterales	Sphaerobacteraceae
Otu3224	Nitrolancea	1	2	0	0	0	0	1	0	0	0	0	0	0	Chloroflexi	Thermomicrobia	Sphaerobacterales	Sphaerobacteraceae
Otu3323	Nitrolancea	5	0	5	0	1	0	0	0	0	0	0	0	0	Chloroflexi	Thermomicrobia	Sphaerobacterales	Sphaerobacteraceae
Otu3405	Nitrolancea	11	1	0	0	0	1	1	2	12	1	0	5	1	Chloroflexi	Thermomicrobia	Sphaerobacterales	Sphaerobacteraceae
Otu3626	Nitrolancea	17	0	0	0	0	0	0	4	17	6	0	0	9	Chloroflexi	Thermomicrobia	Sphaerobacterales	Sphaerobacteraceae
Otu3691	Nitrolancea	17	1	1	0	1	0	0	10	12	9	6	1	18	Chloroflexi	Thermomicrobia	Sphaerobacterales	Sphaerobacteraceae
Otu3913	Nitrolancea	2	0	0	0	0	2	0	0	0	0	0	0	0	Chloroflexi	Thermomicrobia	Sphaerobacterales	Sphaerobacteraceae
Otu4231	Nitrolancea	1	0	0	0	1	0	1	0	0	0	0	0	0	Chloroflexi	Thermomicrobia	Sphaerobacterales	Sphaerobacteraceae
Otu4233	Nitrolancea	1	0	0	0	0	0	0	0	2	0	1	0	0	Chloroflexi	Thermomicrobia	Sphaerobacterales	Sphaerobacteraceae
Otu4290	Nitrolancea	1	0	1	0	0	0	0	0	0	0	0	0	1	Chloroflexi	Thermomicrobia	Sphaerobacterales	Sphaerobacteraceae
Otu4496	Nitrolancea	2	0	0	0	0	0	2	0	0	1	1	0	0	Chloroflexi	Thermomicrobia	Sphaerobacterales	Sphaerobacteraceae
Otu4561	Nitrolancea	1	1	0	0	2	0	0	0	0	0	0	0	0	Chloroflexi	Thermomicrobia	Sphaerobacterales	Sphaerobacteraceae
Otu4683	Nitrolancea	12	1	0	3	8	2	18	0	2	0	3	0	0	Chloroflexi	Thermomicrobia	Sphaerobacterales	Sphaerobacteraceae
Otu4782	Nitrolancea	8	5	4	2	4	3	1	0	2	0	0	1	0	Chloroflexi	Thermomicrobia	Sphaerobacterales	Sphaerobacteraceae
Otu4799	Nitrolancea	4	0	4	1	0	0	0	0	0	0	0	0	0	Chloroflexi	Thermomicrobia	Sphaerobacterales	Sphaerobacteraceae
Otu4865	Nitrolancea	4	4	4	3	2	3	0	2	0	1	1	0	0	Chloroflexi	Thermomicrobia	Sphaerobacterales	Sphaerobacteraceae
Otu5321	Nitrolancea	2	0	1	0	2	0	1	0	0	0	0	0	0	Chloroflexi	Thermomicrobia	Sphaerobacterales	Sphaerobacteraceae
Otu5322	Nitrolancea	1	1	0	0	1	1	0	0	0	2	1	0	0	Chloroflexi	Thermomicrobia	Sphaerobacterales	Sphaerobacteraceae
Otu5325	Nitrolancea	1	1	0	0	0	0	0	1	0	0	0	0	0	Chloroflexi	Thermomicrobia	Sphaerobacterales	Sphaerobacteraceae
Otu5687	Nitrolancea	8	1	4	5	4	1	1	2	3	1	8	3	5	Chloroflexi	Thermomicrobia	Sphaerobacterales	Sphaerobacteraceae
Otu5692	Nitrolancea	12	6	6	4	8	0	13	2	1	1	0	0	3	Chloroflexi	Thermomicrobia	Sphaerobacterales	Sphaerobacteraceae
Otu5701	Nitrolancea	12	6	10	8	16	1	3	0	6	3	5	7	3	Chloroflexi	Thermomicrobia	Sphaerobacterales	Sphaerobacteraceae
Otu1522	Nitrolancea	4	0	0	0	0	0	1	3	1	1	1	0	0	Chloroflexi	Thermomicrobia	Sphaerobacterales	Sphaerobacteraceae
Otu1685	Nitrolancea	2	0	0	1	1	1	0	1	0	0	0	2	0	Chloroflexi	Thermomicrobia	Sphaerobacterales	Sphaerobacteraceae
Otu1937	Nitrolancea	7	3	1	3	1	5	2	1	0	2	3	1	0	Chloroflexi	Thermomicrobia	Sphaerobacterales	Sphaerobacteraceae
Otu2640	Nitrolancea	10	1	3	8	7	0	10	2	3	2	3	1	5	Chloroflexi	Thermomicrobia	Sphaerobacterales	Sphaerobacteraceae
Otu2649	Nitrolancea	6	1	3	0	6	5	5	0	3	0	3	2	1	Chloroflexi	Thermomicrobia	Sphaerobacterales	Sphaerobacteraceae
Otu2742	Nitrolancea	7	0	0	0	1	0	0	7	0	0	2	2	1	Chloroflexi	Thermomicrobia	Sphaerobacterales	Sphaerobacteraceae
Otu2856	Nitrolancea	2	0	0	0	0	0	0	0	0	0	1	0	2	Chloroflexi	Thermomicrobia	Sphaerobacterales	Sphaerobacteraceae
Otu3026	Nitrolancea	1	1	0	1	0	0	0	1	0	0	0	0	0	Chloroflexi	Thermomicrobia	Sphaerobacterales	Sphaerobacteraceae
Otu3088	Nitrolancea	1	0	0	0	0	0	0	1	1	0	0	1	1	Chloroflexi	Thermomicrobia	Sphaerobacterales	Sphaerobacteraceae
Otu3195	Nitrolancea	1	1	0	0	0	0	1	0	0	1	0	0	0	Chloroflexi	Thermomicrobia	Sphaerobacterales	Sphaerobacteraceae
Otu3224	Nitrolancea	1	2	0	0	0	0	1	0	0	0	0	0	0	Chloroflexi	Thermomicrobia	Sphaerobacterales	Sphaerobacteraceae
Otu3323	Nitrolancea	5	0	5	0	1	0	0	0	0	0	0	0	0	Chloroflexi	Thermomicrobia	Sphaerobacterales	Sphaerobacteraceae
Otu3405	Nitrolancea	11	1	0	0	0	1	1	2	12	1	0	5	1	Chloroflexi	Thermomicrobia	Sphaerobacterales	Sphaerobacteraceae
Otu3626	Nitrolancea	17	0	0	0	0	0	0	4	17	6	0	0	9	Chloroflexi	Thermomicrobia	Sphaerobacterales	Sphaerobacteraceae
Otu3691	Nitrolancea	17	1	1	0	1	0	0	10	12	9	6	1	18	Chloroflexi	Thermomicrobia	Sphaerobacterales	Sphaerobacteraceae
Otu3913	Nitrolancea	2	0	0	0	0	2	0	0	0	0	0	0	0	Chloroflexi	Thermomicrobia	Sphaerobacterales	Sphaerobacteraceae
Otu4231	Nitrolancea	1	0	0	0	1	0	1	0	0	0	0	0	0	Chloroflexi	Thermomicrobia	Sphaerobacterales	Sphaerobacteraceae
Otu4233	Nitrolancea	1	0	0	0	0	0	0	0	2	0	1	0	0	Chloroflexi	Thermomicrobia	Sphaerobacterales	Sphaerobacteraceae
Otu4290	Nitrolancea	1	0	1	0	0	0	0	0	0	0	0	0	1	Chloroflexi	Thermomicrobia	Sphaerobacterales	Sphaerobacteraceae
Otu4496	Nitrolancea	2	0	0	0	0	0	2	0	0	1	1	0	0	Chloroflexi	Thermomicrobia	Sphaerobacterales	Sphaerobacteraceae
Otu4561	Nitrolancea	1	1	0	0	2	0	0	0	0	0	0	0	0	Chloroflexi	Thermomicrobia	Sphaerobacterales	Sphaerobacteraceae
Otu4683	Nitrolancea	12	1	0	3	8	2	18	0	2	0	3	0	0	Chloroflexi	Thermomicrobia	Sphaerobacterales	Sphaerobacteraceae
Otu4782	Nitrolancea	8	5	4	2	4	3	1	0	2	0	0	1	0	Chloroflexi	Thermomicrobia	Sphaerobacterales	Sphaerobacteraceae
Otu4799	Nitrolancea	4	0	4	1	0	0	0	0	0	0	0	0	0	Chloroflexi	Thermomicrobia	Sphaerobacterales	Sphaerobacteraceae
Otu4865	Nitrolancea	4	4	4	3	2	3	0	2	0	1	1	0	0	Chloroflexi	Thermomicrobia	Sphaerobacterales	Sphaerobacteraceae
Otu5321	Nitrolancea	2	0	1	0	2	0	1	0	0	0	0	0	0	Chloroflexi	Thermomicrobia	Sphaerobacterales	Sphaerobacteraceae
Otu5322	Nitrolancea	1	1	0	0	1	1	0	0	0	2	1	0	0	Chloroflexi	Thermomicrobia	Sphaerobacterales	Sphaerobacteraceae
Otu5325	Nitrolancea	1	1	0	0	0	0	0	1	0	0	0	0	0	Chloroflexi	Thermomicrobia	Sphaerobacterales	Sphaerobacteraceae
Otu5687	Nitrolancea	8	1	4	5	4	1	1	2	3	1	8	3	5	Chloroflexi	Thermomicrobia	Sphaerobacterales	Sphaerobacteraceae
Otu5692	Nitrolancea	12	6	6	4	8	0	13	2	1	1	0	0	3	Chloroflexi	Thermomicrobia	Sphaerobacterales	Sphaerobacteraceae
Otu5701	Nitrolancea	12	6	10	8	16	1	3	0	6	3	5	7	3	Chloroflexi	Thermomicrobia	Sphaerobacterales	Sphaerobacteraceae
Otu1329	Nitrolancea	2	1	0	0	2	0	1	0	0	0	0	0	0	Chloroflexi	Thermomicrobia	Sphaerobacterales	Sphaerobacteraceae
Otu1378	Nitrolancea	2	1	1	0	2	0	0	0	0	0	0	1	0	Chloroflexi	Thermomicrobia	Sphaerobacterales	Sphaerobacteraceae
Otu1426	Nitrolancea	2	1	2	0	0	0	2	0	1	1	1	1	2	Chloroflexi	Thermomicrobia	Sphaerobacterales	Sphaerobacteraceae
Otu1452	Nitrolancea	12	5	1	4	4	2	7	0	3	2	3	5	1	Chloroflexi	Thermomicrobia	Sphaerobacterales	Sphaerobacteraceae
Otu1466	Nitrolancea	3	0	0	1	0	0	0	3	3	2	1	0	2	Chloroflexi	Thermomicrobia	Sphaerobacterales	Sphaerobacteraceae
Otu894	Nitrosococcus	6	0	0	0	0	0	0	0	7	1	0	3	3	Proteobacteria	Gammaproteobacteria	Chromatiales	Chromatiaceae
Otu1001	Nitrosococcus	4	0	0	4	0	2	0	0	2	0	0	0	1	Proteobacteria	Gammaproteobacteria	Chromatiales	Chromatiaceae
Otu18421	Nitrosococcus	2	0	0	0	2	0	0	0	0	0	0	0	0	Proteobacteria	Gammaproteobacteria	Chromatiales	Chromatiaceae
Otu20014	Nitrosococcus	1	0	0	0	1	0	0	0	0	0	1	0	0	Proteobacteria	Gammaproteobacteria	Chromatiales	Chromatiaceae
Otu21221	Nitrosococcus	2	0	0	0	0	1	2	1	0	0	2	1	0	Proteobacteria	Gammaproteobacteria	Chromatiales	Chromatiaceae
Otu15385	Nitrosococcus	2	0	0	2	0	0	0	0	0	0	0	0	0	Proteobacteria	Gammaproteobacteria	Chromatiales	Chromatiaceae
Otu13205	Nitrosococcus	6	8	1	1	1	1	4	1	0	4	0	1	0	Proteobacteria	Gammaproteobacteria	Chromatiales	Chromatiaceae
Otu12207	Nitrosococcus	1	0	0	0	0	0	0	0	1	0	0	1	1	Proteobacteria	Gammaproteobacteria	Chromatiales	Chromatiaceae
Otu9525	Nitrosococcus	3	0	1	0	0	0	0	3	0	0	0	0	0	Proteobacteria	Gammaproteobacteria	Chromatiales	Chromatiaceae
Otu7496	Nitrosococcus	4	0	1	0	0	0	4	2	3	2	0	1	0	Proteobacteria	Gammaproteobacteria	Chromatiales	Chromatiaceae
Otu9525	Nitrosococcus	3	0	1	0	0	0	0	3	0	0	0	0	0	Proteobacteria	Gammaproteobacteria	Chromatiales	Chromatiaceae
Otu1339	Nitrosococcus	8	0	10	0	0	0	0	4	0	0	0	2	3	Proteobacteria	Gammaproteobacteria	Chromatiales	Chromatiaceae
Otu311	Nitrosomonas	25	0	0	0	6	4	3	18	21	12	11	16	25	Proteobacteria	Betaproteobacteria	Nitrosomonadales	Nitrosomonadaceae
Otu22968	Nitrosomonas	2	0	0	0	0	0	0	2	0	0	0	0	0	Proteobacteria	Betaproteobacteria	Nitrosomonadales	Nitrosomonadaceae
Otu22968	Nitrosomonas	2	0	0	0	0	0	0	2	0	0	0	0	0	Proteobacteria	Betaproteobacteria	Nitrosomonadales	Nitrosomonadaceae
Otu10247	Nitrosomonas	5	5	0	0	0	1	0	0	0	0	0	0	0	Proteobacteria	Betaproteobacteria	Nitrosomonadales	Nitrosomonadaceae
Otu10247	Nitrosomonas	5	5	0	0	0	1	0	0	0	0	0	0	0	Proteobacteria	Betaproteobacteria	Nitrosomonadales	Nitrosomonadaceae
Otu1061	Nitrosopumilus	10	0	0	0	0	4	0	10	0	1	0	0	1	Thaumarchaeota	NA	Nitrosopumilales	Nitrosopumilaceae
Otu24748	Nitrosopumilus	2	0	0	0	0	2	0	0	0	0	0	0	0	Thaumarchaeota	NA	Nitrosopumilales	Nitrosopumilaceae
Otu85	Nitrososphaera	89	89	87	86	96	59	45	16	13	13	41	40	15	Thaumarchaeota	NA	Nitrososphaerales	Nitrososphaeraceae
Otu342	Nitrososphaera	38	24	17	9	20	23	39	25	20	22	24	29	23	Thaumarchaeota	NA	Nitrososphaerales	Nitrososphaeraceae
Otu367	Nitrososphaera	21	16	22	17	14	13	22	12	6	16	13	13	6	Thaumarchaeota	NA	Nitrososphaerales	Nitrososphaeraceae
Otu535	Nitrososphaera	13	5	10	8	11	9	5	2	3	2	13	2	4	Thaumarchaeota	NA	Nitrososphaerales	Nitrososphaeraceae
Otu971	Nitrososphaera	23	10	11	27	15	7	16	6	3	5	12	4	8	Thaumarchaeota	NA	Nitrososphaerales	Nitrososphaeraceae
Otu26027	Nitrososphaera	2	0	2	1	0	0	1	0	0	0	0	0	0	Thaumarchaeota	NA	Nitrososphaerales	Nitrososphaeraceae
Otu22862	Nitrososphaera	1	0	0	0	0	0	0	0	0	1	0	1	0	Thaumarchaeota	NA	Nitrososphaerales	Nitrososphaeraceae
Otu19928	Nitrososphaera	1	1	0	0	0	0	0	0	0	0	0	1	0	Thaumarchaeota	NA	Nitrososphaerales	Nitrososphaeraceae
Otu22862	Nitrososphaera	1	0	0	0	0	0	0	0	0	1	0	1	0	Thaumarchaeota	NA	Nitrososphaerales	Nitrososphaeraceae
Otu11671	Nitrososphaera	1	0	0	0	1	0	0	0	0	1	1	0	0	Thaumarchaeota	NA	Nitrososphaerales	Nitrososphaeraceae
Otu11787	Nitrososphaera	1	0	0	0	0	0	1	0	0	0	0	0	1	Thaumarchaeota	NA	Nitrososphaerales	Nitrososphaeraceae
Otu13088	Nitrososphaera	1	0	0	1	1	0	0	0	0	1	0	0	0	Thaumarchaeota	NA	Nitrososphaerales	Nitrososphaeraceae
Otu5757	Nitrososphaera	4	1	0	1	2	2	4	1	1	0	0	0	0	Thaumarchaeota	NA	Nitrososphaerales	Nitrososphaeraceae
Otu2660	Nitrososphaera	14	5	5	14	9	4	3	2	1	0	3	5	2	Thaumarchaeota	NA	Nitrososphaerales	Nitrososphaeraceae
Otu2836	Nitrososphaera	5	0	0	4	0	0	2	1	0	2	4	0	5	Thaumarchaeota	NA	Nitrososphaerales	Nitrososphaeraceae
Otu2660	Nitrososphaera	14	5	5	14	9	4	3	2	1	0	3	5	2	Thaumarchaeota	NA	Nitrososphaerales	Nitrososphaeraceae
Otu2836	Nitrososphaera	5	0	0	4	0	0	2	1	0	2	4	0	5	Thaumarchaeota	NA	Nitrososphaerales	Nitrososphaeraceae
Otu6613	Nitrosospira	6	2	0	1	4	3	4	2	4	3	2	2	2	Proteobacteria	Betaproteobacteria	Nitrosomonadales	Nitrosomonadaceae
Otu2193	Nitrosospira	33	3	2	3	28	10	27	9	7	2	9	2	2	Proteobacteria	Betaproteobacteria	Nitrosomonadales	Nitrosomonadaceae
Otu148	Nitrospira	52	40	54	46	57	46	42	42	27	16	29	32	12	Nitrospirae	Nitrospira	Nitrospirales	Nitrospiraceae
Otu450	Nitrospira	20	4	3	3	7	7	11	20	22	13	17	20	17	Nitrospirae	Nitrospira	Nitrospirales	Nitrospiraceae
Otu634	Nitrospira	22	5	9	23	11	17	10	6	6	2	2	3	3	Nitrospirae	Nitrospira	Nitrospirales	Nitrospiraceae
Otu30496	Nitrospira	1	0	0	0	0	0	0	0	0	0	1	0	1	Nitrospirae	Nitrospira	Nitrospirales	Nitrospiraceae
Otu25177	Nitrospira	1	0	0	0	0	1	0	0	0	1	0	0	0	Nitrospirae	Nitrospira	Nitrospirales	Nitrospiraceae
Otu17606	Nitrospira	1	0	0	1	0	0	0	0	0	0	1	0	0	Nitrospirae	Nitrospira	Nitrospirales	Nitrospiraceae
Otu13526	Nitrospira	4	0	1	0	0	4	1	0	0	4	0	0	0	Nitrospirae	Nitrospira	Nitrospirales	Nitrospiraceae
Otu12485	Nitrospira	3	0	1	1	1	1	1	0	0	0	1	1	2	Nitrospirae	Nitrospira	Nitrospirales	Nitrospiraceae
Otu8598	Nitrospira	2	0	2	1	0	2	0	0	0	0	1	0	1	Nitrospirae	Nitrospira	Nitrospirales	Nitrospiraceae
Otu4097	Nitrospira	1	0	0	0	1	1	1	0	0	0	0	0	0	Nitrospirae	Nitrospira	Nitrospirales	Nitrospiraceae
Otu4616	Nitrospira	8	0	8	0	0	0	0	0	1	0	0	0	0	Nitrospirae	Nitrospira	Nitrospirales	Nitrospiraceae
Otu4699	Nitrospira	13	3	4	1	9	8	3	1	2	3	2	10	6	Nitrospirae	Nitrospira	Nitrospirales	Nitrospiraceae
Otu4802	Nitrospira	4	1	1	0	0	0	2	0	1	0	3	4	1	Nitrospirae	Nitrospira	Nitrospirales	Nitrospiraceae
Otu5736	Nitrospira	10	0	5	3	10	7	8	1	0	0	0	1	1	Nitrospirae	Nitrospira	Nitrospirales	Nitrospiraceae
Otu3177	Nitrospira	3	0	2	0	0	0	3	0	0	0	0	0	0	Nitrospirae	Nitrospira	Nitrospirales	Nitrospiraceae
Otu3555	Nitrospira	19	0	4	1	0	1	3	8	8	1	3	7	27	Nitrospirae	Nitrospira	Nitrospirales	Nitrospiraceae
Otu4097	Nitrospira	1	0	0	0	1	1	1	0	0	0	0	0	0	Nitrospirae	Nitrospira	Nitrospirales	Nitrospiraceae
Otu4616	Nitrospira	8	0	8	0	0	0	0	0	1	0	0	0	0	Nitrospirae	Nitrospira	Nitrospirales	Nitrospiraceae
Otu4699	Nitrospira	13	3	4	1	9	8	3	1	2	3	2	10	6	Nitrospirae	Nitrospira	Nitrospirales	Nitrospiraceae
Otu4802	Nitrospira	4	1	1	0	0	0	2	0	1	0	3	4	1	Nitrospirae	Nitrospira	Nitrospirales	Nitrospiraceae
Otu5736	Nitrospira	10	0	5	3	10	7	8	1	0	0	0	1	1	Nitrospirae	Nitrospira	Nitrospirales	Nitrospiraceae
Otu1862	Nitrospira	17	5	1	4	0	9	9	18	10	7	5	8	6	Nitrospirae	Nitrospira	Nitrospirales	Nitrospiraceae
Otu2100	Nitrospira	2	0	1	0	2	0	0	0	0	0	0	0	0	Nitrospirae	Nitrospira	Nitrospirales	Nitrospiraceae
Otu3177	Nitrospira	3	0	2	0	0	0	3	0	0	0	0	0	0	Nitrospirae	Nitrospira	Nitrospirales	Nitrospiraceae
Otu3555	Nitrospira	19	0	4	1	0	1	3	8	8	1	3	7	27	Nitrospirae	Nitrospira	Nitrospirales	Nitrospiraceae
Otu4097	Nitrospira	1	0	0	0	1	1	1	0	0	0	0	0	0	Nitrospirae	Nitrospira	Nitrospirales	Nitrospiraceae
Otu4616	Nitrospira	8	0	8	0	0	0	0	0	1	0	0	0	0	Nitrospirae	Nitrospira	Nitrospirales	Nitrospiraceae
Otu4699	Nitrospira	13	3	4	1	9	8	3	1	2	3	2	10	6	Nitrospirae	Nitrospira	Nitrospirales	Nitrospiraceae
Otu4802	Nitrospira	4	1	1	0	0	0	2	0	1	0	3	4	1	Nitrospirae	Nitrospira	Nitrospirales	Nitrospiraceae
Otu18877	Nitrospirillum	2	0	0	0	2	0	2	0	0	0	0	0	0	Proteobacteria	Alphaproteobacteria	Rhodospirillales	Rhodospirillaceae
Otu10876	Nitrospirillum	5	4	1	0	0	0	3	0	0	0	1	0	0	Proteobacteria	Alphaproteobacteria	Rhodospirillales	Rhodospirillaceae
Otu12248	Nitrospirillum	4	1	0	1	1	0	1	0	1	0	0	2	0	Proteobacteria	Alphaproteobacteria	Rhodospirillales	Rhodospirillaceae
Otu12804	Nitrospirillum	1	2	0	0	0	1	0	0	0	0	0	0	0	Proteobacteria	Alphaproteobacteria	Rhodospirillales	Rhodospirillaceae
Otu8920	Nitrospirillum	25	4	0	0	0	2	0	6	9	7	6	7	5	Proteobacteria	Alphaproteobacteria	Rhodospirillales	Rhodospirillaceae
Otu9030	Nitrospirillum	2	0	1	1	0	0	1	0	0	0	0	1	1	Proteobacteria	Alphaproteobacteria	Rhodospirillales	Rhodospirillaceae
Otu10491	Nitrospirillum	2	1	0	0	2	0	0	0	0	0	0	0	0	Proteobacteria	Alphaproteobacteria	Rhodospirillales	Rhodospirillaceae
Otu8920	Nitrospirillum	25	4	0	0	0	2	0	6	9	7	6	7	5	Proteobacteria	Alphaproteobacteria	Rhodospirillales	Rhodospirillaceae
Otu9030	Nitrospirillum	2	0	1	1	0	0	1	0	0	0	0	1	1	Proteobacteria	Alphaproteobacteria	Rhodospirillales	Rhodospirillaceae
Otu10491	Nitrospirillum	2	1	0	0	2	0	0	0	0	0	0	0	0	Proteobacteria	Alphaproteobacteria	Rhodospirillales	Rhodospirillaceae
Otu1797	Nitrospirillum	8	1	0	0	0	0	1	2	1	3	0	4	3	Proteobacteria	Alphaproteobacteria	Rhodospirillales	Rhodospirillaceae
Otu1485	Nitrospirillum	6	0	0	0	0	0	1	2	0	1	1	3	2	Proteobacteria	Alphaproteobacteria	Rhodospirillales	Rhodospirillaceae
Otu4798	unclassified	4	2	2	2	0	1	0	0	4	1	2	2	0	Proteobacteria	Alphaproteobacteria	unclassified	unclassified
Otu4798	unclassified	4	2	2	2	0	1	0	0	4	1	2	2	0	Proteobacteria	Alphaproteobacteria	unclassified	unclassified
Otu4798	unclassified	4	2	2	2	0	1	0	0	4	1	2	2	0	Proteobacteria	Alphaproteobacteria	unclassified	unclassified
